# Supplementary material for: Ellinaite, CaCr&lt;sub&gt;2&lt;/sub&gt;O&lt;sub&gt;4&lt;/sub&gt;, a new natural post-spinel oxide from Hatrurim Basin, Israel, and Juína kimberlite field, Brazil
Source: Copernicus journal article supplement (doi:10.5194/ejm-33-727-2021), 2021-12-03

# checkCIF/PLATON report

Structure factors have been supplied for datablock(s) Ellinaite

THIS REPORT IS FOR GUIDANCE ONLY. IF USED AS PART OF A REVIEW PROCEDURE FOR PUBLICATION, IT SHOULD NOT REPLACE THE EXPERTISE OF AN EXPERIENCED CRYSTALLOGRAPHIC REFEREE.

No syntax errors found.      CIF dictionary      Interpreting this report

## Datablock: Ellinaite

---

Bond precision:    Cr- O = 0.0050 A                      Wavelength=0.71073

Cell:                      a=8.868(9)              b=2.885(3)              c=10.355(11)  
                            alpha=90              beta=90              gamma=90  
Temperature:              296 K

|                | Calculated    | Reported    |
|----------------|---------------|-------------|
| Volume         | 264.9(5)      | 264.9(5)    |
| Space group    | P n m a       | P n m a     |
| Hall group     | -P 2ac 2n     | ?           |
| Moiety formula | Cr4 O8, 2(Ca) | ?           |
| Sum formula    | Ca2 Cr4 O8    | Ca Cr2 O4   |
| Mr             | 416.16        | 208.08      |
| Dx,g cm-3      | 5.218         | 5.217       |
| Z              | 2             | 4           |
| Mu (mm-1)      | 9.936         | 9.935       |
| F000           | 400.0         | 400.0       |
| F000'          | 403.63        |             |
| h,k,lmax       | 11,3,13       | 11,3,13     |
| Nref           | 351           | 348         |
| Tmin,Tmax      | 0.788,0.820   | 0.273,1.000 |
| Tmin'          | 0.742         |             |

Correction method= # Reported T Limits: Tmin=0.273 Tmax=1.000  
AbsCorr = MULTI-SCAN

Data completeness= 0.991                      Theta(max)= 26.983

R(reflections)= 0.0588( 312)                      wR2(reflections)= 0.1572( 348)

S = 1.105                      Npar= 43

---

The following ALERTS were generated. Each ALERT has the format

**test-name\_ALERT\_alert-type\_alert-level.**

Click on the hyperlinks for more details of the test.

---

### ● Alert level C

DIFMN02\_ALERT\_2\_C The minimum difference density is < -0.1\*ZMAX\*0.75  
\_refine\_diff\_density\_min given = -1.834  
Test value = -1.800

DIFMN03\_ALERT\_1\_C The minimum difference density is < -0.1\*ZMAX\*0.75  
The relevant atom site should be identified.

|                   |                                                 |        |        |
|-------------------|-------------------------------------------------|--------|--------|
| PLAT088_ALERT_3_C | Poor Data / Parameter Ratio .....               | 8.09   | Note   |
| PLAT098_ALERT_2_C | Large Reported Min. (Negative) Residual Density | -1.83  | eA-3   |
| PLAT148_ALERT_3_C | s.u. on the a - Axis is (Too) Large ...         | 0.009  | Ang.   |
| PLAT148_ALERT_3_C | s.u. on the b - Axis is (Too) Large ...         | 0.0030 | Ang.   |
| PLAT148_ALERT_3_C | s.u. on the c - Axis is (Too) Large ...         | 0.011  | Ang.   |
| PLAT250_ALERT_2_C | Large U3/U1 Ratio for Average U(i,j) Tensor ... | 2.3    | Note   |
| PLAT911_ALERT_3_C | Missing FCF Refl Between Thmin & STh/L= 0.600   | 3      | Report |
| PLAT973_ALERT_2_C | Check Calcd Positive Resid. Density on Cr1      | 1.13   | eA-3   |
| PLAT973_ALERT_2_C | Check Calcd Positive Resid. Density on Ca1      | 1.06   | eA-3   |
| PLAT975_ALERT_2_C | Check Calcd Resid. Dens. 0.70A From O1          | 0.72   | eA-3   |
| PLAT976_ALERT_2_C | Check Calcd Resid. Dens. 1.03A From O3          | -0.88  | eA-3   |

---

### ● Alert level G

|                   |                                                  |      |        |
|-------------------|--------------------------------------------------|------|--------|
| PLAT004_ALERT_5_G | Polymeric Structure Found with Maximum Dimension | 3    | Info   |
| PLAT045_ALERT_1_G | Calculated and Reported Z Differ by a Factor ... | 0.50 | Check  |
| PLAT072_ALERT_2_G | SHELXL First Parameter in WGHT Unusually Large   | 0.12 | Report |
| PLAT794_ALERT_5_G | Tentative Bond Valency for Cr1 (IV) .            | 4.12 | Info   |
| PLAT794_ALERT_5_G | Tentative Bond Valency for Cr2 (IV) .            | 3.97 | Info   |
| PLAT933_ALERT_2_G | Number of OMIT Records in Embedded .res File ... | 3    | Note   |

---

- 0 **ALERT level A** = Most likely a serious problem - resolve or explain  
0 **ALERT level B** = A potentially serious problem, consider carefully  
13 **ALERT level C** = Check. Ensure it is not caused by an omission or oversight  
6 **ALERT level G** = General information/check it is not something unexpected
- 2 **ALERT type 1** CIF construction/syntax error, inconsistent or missing data  
9 **ALERT type 2** Indicator that the structure model may be wrong or deficient  
5 **ALERT type 3** Indicator that the structure quality may be low  
0 **ALERT type 4** Improvement, methodology, query or suggestion  
3 **ALERT type 5** Informative message, check
- 
-

It is advisable to attempt to resolve as many as possible of the alerts in all categories. Often the minor alerts point to easily fixed oversights, errors and omissions in your CIF or refinement strategy, so attention to these fine details can be worthwhile. In order to resolve some of the more serious problems it may be necessary to carry out additional measurements or structure refinements. However, the purpose of your study may justify the reported deviations and the more serious of these should normally be commented upon in the discussion or experimental section of a paper or in the "special\_details" fields of the CIF. checkCIF was carefully designed to identify outliers and unusual parameters, but every test has its limitations and alerts that are not important in a particular case may appear. Conversely, the absence of alerts does not guarantee there are no aspects of the results needing attention. It is up to the individual to critically assess their own results and, if necessary, seek expert advice.

### **Publication of your CIF in IUCr journals**

A basic structural check has been run on your CIF. These basic checks will be run on all CIFs submitted for publication in IUCr journals (*Acta Crystallographica*, *Journal of Applied Crystallography*, *Journal of Synchrotron Radiation*); however, if you intend to submit to *Acta Crystallographica Section C* or *E* or *IUCrData*, you should make sure that full publication checks are run on the final version of your CIF prior to submission.

### **Publication of your CIF in other journals**

Please refer to the *Notes for Authors* of the relevant journal for any special instructions relating to CIF submission.

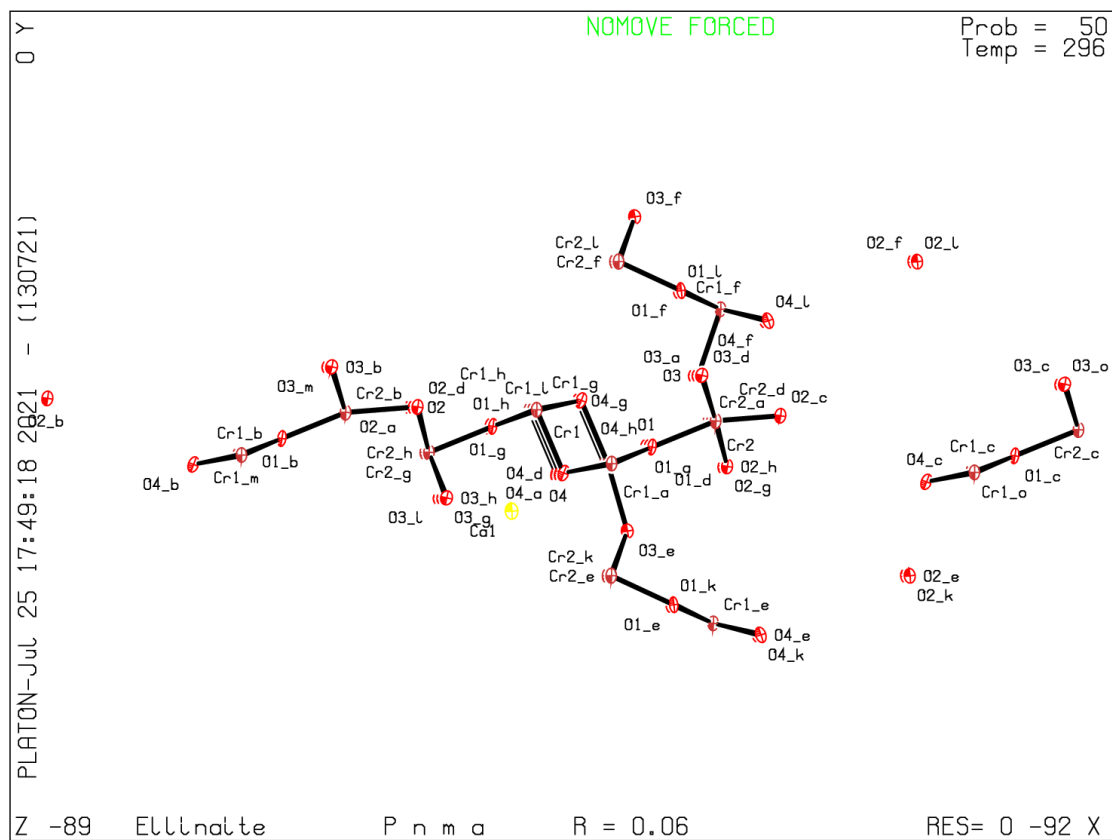

Supplement: Supplementary file 1 [file ejm-33-727-2021-supplement.zip › Ellinaite_checkcif.pdf]
