# Supplementary material for: Ellinaite, CaCr&lt;sub&gt;2&lt;/sub&gt;O&lt;sub&gt;4&lt;/sub&gt;, a new natural post-spinel oxide from Hatrurim Basin, Israel, and Juína kimberlite field, Brazil
Source: Copernicus journal article supplement (doi:10.5194/ejm-33-727-2021), 2021-12-03
Supplement: Supplementary file 1 [file ejm-33-727-2021-supplement.zip]

Archive with 5 entries (5 files):
- ejm-33-727-2021-supplement-title-page.pdf
- Ellinaite.cif
- Ellinaite_checkcif.pdf
- Tables-Suppl-Eln-EJM-21-07-2021.pdf
- Suppl-Figs-Ellinaite-pap-EJM-21-07-2121.pdf
