# Supplementary material for: Ellinaite, CaCr&lt;sub&gt;2&lt;/sub&gt;O&lt;sub&gt;4&lt;/sub&gt;, a new natural post-spinel oxide from Hatrurim Basin, Israel, and Juína kimberlite field, Brazil
Source: Copernicus journal article supplement (doi:10.5194/ejm-33-727-2021), 2021-12-03
Supplement: Supplementary file 1 [file ejm-33-727-2021-supplement.zip › ejm-33-727-2021-supplement-title-page.pdf]

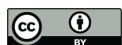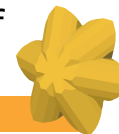

*Supplement of*

**Ellinaite,  $\text{CaCr}_2\text{O}_4$ , a new natural post-spinel oxide from Hatrurim Basin, Israel, and Juína kimberlite field, Brazil**

**Victor V. Sharygin et al.**

*Correspondence to:* Victor V. Sharygin ([sharygin@igm.nsc.ru](mailto:sharygin@igm.nsc.ru))

- [ejm-33-727-2021-supplement-title-page.pdf](#)
- [Ellinaite.cif](#)
- [Ellinaite\\_checkcif.pdf](#)
- [Suppl-Figs-Ellinaite-pap-EJM-21-07-2121.pdf](#)
- [Tables-Suppl-Eln-EJM-21-07-2021.pdf](#)

The copyright of individual parts of the supplement might differ from the article licence.
