# Supplementary material for: Ellinaite, CaCr&lt;sub&gt;2&lt;/sub&gt;O&lt;sub&gt;4&lt;/sub&gt;, a new natural post-spinel oxide from Hatrurim Basin, Israel, and Juína kimberlite field, Brazil
Source: Copernicus journal article supplement (doi:10.5194/ejm-33-727-2021), 2021-12-03
Supplement: Supplementary file 1 [file ejm-33-727-2021-supplement.zip › Ellinaite.cif]

data_Ellinaite

_chemical_name_mineral             'Ellinaite'
_chemical_formula_sum              'Ca Cr2 O4'
_chemical_formula_weight           208.08


loop_
  _atom_type_symbol
  _atom_type_description
  _atom_type_scat_dispersion_real
  _atom_type_scat_dispersion_imag
  _atom_type_scat_source
 'Ca' 'Ca' 0.2262 0.3064 'International Tables Vol C Tables 4.2.6.8 and 6.1.1.4'
 'Cr' 'Cr' 0.3209 0.6236 'International Tables Vol C Tables 4.2.6.8 and 6.1.1.4'
 'O' 'O' 0.0106 0.0060 'International Tables Vol C Tables 4.2.6.8 and 6.1.1.4'

_symmetry_cell_setting           orthorhombic
_space_group_IT_number           62
_symmetry_space_group_name_H-M   'P n m a'

loop_
  _symmetry_equiv_pos_as_xyz
 'x, y, z'
 '-x+1/2, -y, z+1/2'
 '-x, y+1/2, -z'
 'x+1/2, -y+1/2, -z+1/2'
 '-x, -y, -z'
 'x-1/2, y, -z-1/2'
 'x, -y-1/2, z'
 '-x-1/2, y-1/2, z-1/2'

_cell_length_a                     8.868(9)
_cell_length_b                     2.885(3)
_cell_length_c                     10.355(11)
_cell_angle_alpha                  90
_cell_angle_beta                   90
_cell_angle_gamma                  90
_cell_volume                       264.9(5)
_cell_formula_units_Z              4
_cell_measurement_reflns_used      856
_cell_measurement_temperature      296(2)
_cell_measurement_theta_min        3.94
_cell_measurement_theta_max        30.46
_exptl_absorpt_coefficient_mu      9.935
_exptl_absorpt_correction_T_min    0.27316
_exptl_absorpt_correction_T_max    1.00000
_exptl_absorpt_correction_type     multi-scan
_exptl_absorpt_process_details
;
CrysAlisPro 1.171.39.44a (Rigaku Oxford Diffraction, 2018)
Empirical absorption correction using spherical harmonics,
 implemented in SCALE3 ABSPACK scaling algorithm.
;
_exptl_crystal_colour              'black'
_exptl_crystal_density_diffrn      5.217
_exptl_crystal_density_meas        .
_exptl_crystal_density_method      'not measured'
_exptl_crystal_description         'block'
_exptl_crystal_F_000               400
_exptl_crystal_size_max            0.03
_exptl_crystal_size_mid            0.02
_exptl_crystal_size_min            0.02
_diffrn_reflns_av_R_equivalents    0.0801
_diffrn_reflns_av_unetI/netI       0.0311
_diffrn_reflns_Laue_measured_fraction_full  0.990
_diffrn_reflns_Laue_measured_fraction_max  0.991
_diffrn_reflns_limit_h_max         11
_diffrn_reflns_limit_h_min         -11
_diffrn_reflns_limit_k_max         3
_diffrn_reflns_limit_k_min         -3
_diffrn_reflns_limit_l_max         13
_diffrn_reflns_limit_l_min         -13
_diffrn_reflns_number              2189
_diffrn_reflns_point_group_measured_fraction_full  0.990
_diffrn_reflns_point_group_measured_fraction_max  0.991
_diffrn_reflns_theta_full          25.242
_diffrn_reflns_theta_max           26.983
_diffrn_reflns_theta_min           3.024
_diffrn_ambient_temperature        296(2)
_diffrn_measured_fraction_theta_full  0.990
_diffrn_measured_fraction_theta_max  0.991
_diffrn_measurement_device         'four-circle diffractometer'
_diffrn_measurement_device_type    'Bruker Kappa APEX2 DUO CCD'
_diffrn_measurement_method         '\w and \f scans'
_diffrn_radiation_monochromator    mirror
_diffrn_radiation_probe            x-ray
_diffrn_radiation_type             MoK\a
_diffrn_radiation_wavelength       0.71073
_diffrn_source                     'fine-focus sealed X-ray tube'
_diffrn_source_type                'Enhance (Mo) X-ray Source'

_reflns_Friedel_coverage           0.000
_reflns_Friedel_fraction_full      .
_reflns_Friedel_fraction_max       .
_reflns_number_gt                  312
_reflns_number_total               348
_reflns_special_details
;
 Reflections were merged by SHELXL according to the crystal
 class for the calculation of statistics and refinement.
 
 _reflns_Friedel_fraction is defined as the number of unique
 Friedel pairs measured divided by the number that would be
 possible theoretically, ignoring centric projections and
 systematic absences.
;
_reflns_threshold_expression       'I > 2\s(I)'
_computing_cell_refinement         'Bruker APEX2'
_computing_data_collection         'Bruker APEX2'
_computing_data_reduction          'CrysAlisPro 1.171.40.67a (Rigaku OD, 2019)'
_computing_molecular_graphics      'Olex2 (Dolomanov et al., 2009)'
_computing_structure_refinement    'ShelXL (Sheldrick, 2015)'
_computing_structure_solution      'ShelXT (Sheldrick, 2015)'
_refine_diff_density_max           1.563
_refine_diff_density_min           -1.834
_refine_diff_density_rms           0.543
_refine_ls_extinction_coef         .
_refine_ls_extinction_method       none
_refine_ls_goodness_of_fit_ref     1.105
_refine_ls_matrix_type             full
_refine_ls_number_parameters       43
_refine_ls_number_reflns           348
_refine_ls_number_restraints       0
_refine_ls_R_factor_all            0.0627
_refine_ls_R_factor_gt             0.0588
_refine_ls_restrained_S_all        1.105
_refine_ls_shift/su_max            0.000
_refine_ls_shift/su_mean           0.000
_refine_ls_structure_factor_coef   Fsqd
_refine_ls_weighting_details      
 'w=1/[\s^2^(Fo^2^)+(0.1172P)^2^+1.0107P] where P=(Fo^2^+2Fc^2^)/3'
_refine_ls_weighting_scheme        calc
_refine_ls_wR_factor_gt            0.1459
_refine_ls_wR_factor_ref           0.1572

_atom_sites_solution_primary       dual
_atom_sites_solution_secondary     difmap

loop_
  _atom_site_label
  _atom_site_type_symbol
  _atom_site_fract_x
  _atom_site_fract_y
  _atom_site_fract_z
  _atom_site_U_iso_or_equiv
  _atom_site_adp_type
  _atom_site_occupancy
  _atom_site_site_symmetry_order
  _atom_site_calc_flag
  _atom_site_refinement_flags_posn
  _atom_site_refinement_flags_adp
  _atom_site_refinement_flags_occupancy
  _atom_site_disorder_assembly
  _atom_site_disorder_group
 Ca1 Ca 0.2589(2) 0.750000 0.34162(17) 0.0222(7) Uani 1 2 d S T P . .
 Cr1 Cr 0.41706(16) 0.750000 0.60142(13) 0.0160(6) Uani 1 2 d S T P . .
 Cr2 Cr 0.56064(17) 0.250000 0.88744(13) 0.0163(6) Uani 1 2 d S T P . .
 O1 O 0.4729(6) 0.250000 0.7152(5) 0.0160(12) Uani 1 2 d S T P . .
 O2 O 0.5828(6) 0.250000 0.0733(6) 0.0179(13) Uani 1 2 d S T P . .
 O3 O 0.7043(7) 0.750000 0.8416(5) 0.0165(12) Uani 1 2 d S T P . .
 O4 O 0.3837(6) 0.250000 0.4759(5) 0.0170(12) Uani 1 2 d S T P . .

loop_
  _atom_site_aniso_label
  _atom_site_aniso_U_11
  _atom_site_aniso_U_22
  _atom_site_aniso_U_33
  _atom_site_aniso_U_23
  _atom_site_aniso_U_13
  _atom_site_aniso_U_12
 Ca1 0.0220(10) 0.0315(11) 0.0133(11) 0.000 -0.0007(6) 0.000
 Cr1 0.0181(9) 0.0209(9) 0.0091(9) 0.000 -0.0002(4) 0.000
 Cr2 0.0196(9) 0.0200(9) 0.0094(9) 0.000 0.0001(4) 0.000
 O1 0.021(3) 0.020(3) 0.006(2) 0.000 0.002(2) 0.000
 O2 0.018(3) 0.027(3) 0.010(3) 0.000 0.001(2) 0.000
 O3 0.017(3) 0.021(3) 0.012(3) 0.000 0.001(2) 0.000
 O4 0.020(3) 0.021(3) 0.010(3) 0.000 0.004(2) 0.000

_geom_special_details
;
 All esds (except the esd in the dihedral angle between two l.s. planes)
 are estimated using the full covariance matrix.  The cell esds are taken
 into account individually in the estimation of esds in distances, angles
 and torsion angles; correlations between esds in cell parameters are only
 used when they are defined by crystal symmetry.  An approximate (isotropic)
 treatment of cell esds is used for estimating esds involving l.s. planes.
;
loop_
  _geom_bond_atom_site_label_1
  _geom_bond_atom_site_label_2
  _geom_bond_distance
  _geom_bond_site_symmetry_2
  _geom_bond_publ_flag
 Ca1 Ca1 2.885(3) 1_545 ?
 Ca1 Ca1 2.885(3) 1_565 ?
 Ca1 Cr2 2.873(4) 2_564 ?
 Ca1 Cr2 2.861(3) 5_666 ?
 Ca1 O1 2.450(6) 5_666 ?
 Ca1 O1 2.438(6) 2_564 ?
 Ca1 O2 2.301(5) 6_556 ?
 Ca1 O2 2.301(5) 6_566 ?
 Ca1 O3 2.405(5) 5_676 ?
 Ca1 O3 2.405(5) 5_666 ?
 Ca1 O4 2.289(5) 1_565 ?
 Ca1 O4 2.289(5) . ?
 Cr1 Cr1 2.942(3) 5_666 ?
 Cr1 Cr1 2.885(3) 1_545 ?
 Cr1 Cr1 2.885(3) 1_565 ?
 Cr1 Cr1 2.942(3) 5_676 ?
 Cr1 O1 1.927(4) . ?
 Cr1 O1 1.927(4) 1_565 ?
 Cr1 O3 1.977(7) 6_557 ?
 Cr1 O4 1.964(4) . ?
 Cr1 O4 1.940(6) 5_666 ?
 Cr1 O4 1.964(4) 1_565 ?
 Cr2 Cr2 2.945(3) 5_667 ?
 Cr2 Cr2 2.885(3) 1_545 ?
 Cr2 Cr2 2.885(3) 1_565 ?
 Cr2 Cr2 2.945(3) 5_657 ?
 Cr2 O1 1.946(6) . ?
 Cr2 O2 1.935(7) 1_556 ?
 Cr2 O2 1.965(4) 5_656 ?
 Cr2 O2 1.965(4) 5_666 ?
 Cr2 O3 1.982(4) . ?
 Cr2 O3 1.982(4) 1_545 ?

loop_
  _geom_angle_atom_site_label_1
  _geom_angle_atom_site_label_2
  _geom_angle_atom_site_label_3
  _geom_angle
  _geom_angle_site_symmetry_1
  _geom_angle_site_symmetry_3
  _geom_angle_publ_flag
 Ca1 Ca1 Ca1 180.0 1_565 1_545 ?
 Cr2 Ca1 Ca1 90.0 5_666 1_565 ?
 Cr2 Ca1 Ca1 90.0 2_564 1_565 ?
 Cr2 Ca1 Ca1 90.0 2_564 1_545 ?
 Cr2 Ca1 Ca1 90.0 5_666 1_545 ?
 Cr2 Ca1 Cr2 133.51(8) 5_666 2_564 ?
 O1 Ca1 Ca1 90.0 2_564 1_565 ?
 O1 Ca1 Ca1 90.0 2_564 1_545 ?
 O1 Ca1 Ca1 90.0 5_666 1_545 ?
 O1 Ca1 Ca1 90.0 5_666 1_565 ?
 O1 Ca1 Cr2 42.00(14) 2_564 2_564 ?
 O1 Ca1 Cr2 175.61(14) 5_666 2_564 ?
 O1 Ca1 Cr2 42.10(13) 5_666 5_666 ?
 O1 Ca1 Cr2 91.52(17) 2_564 5_666 ?
 O1 Ca1 O1 133.62(10) 2_564 5_666 ?
 O2 Ca1 Ca1 128.81(10) 6_566 1_545 ?
 O2 Ca1 Ca1 51.19(10) 6_556 1_545 ?
 O2 Ca1 Ca1 51.19(10) 6_566 1_565 ?
 O2 Ca1 Ca1 128.81(10) 6_556 1_565 ?
 O2 Ca1 Cr2 134.17(13) 6_566 5_666 ?
 O2 Ca1 Cr2 134.17(13) 6_556 5_666 ?
 O2 Ca1 Cr2 42.89(11) 6_556 2_564 ?
 O2 Ca1 Cr2 42.89(11) 6_566 2_564 ?
 O2 Ca1 O1 68.47(18) 6_556 2_564 ?
 O2 Ca1 O1 138.66(12) 6_556 5_666 ?
 O2 Ca1 O1 68.47(18) 6_566 2_564 ?
 O2 Ca1 O1 138.66(12) 6_566 5_666 ?
 O2 Ca1 O2 77.6(2) 6_556 6_566 ?
 O2 Ca1 O3 140.3(2) 6_566 5_666 ?
 O2 Ca1 O3 91.04(18) 6_556 5_666 ?
 O2 Ca1 O3 91.04(18) 6_566 5_676 ?
 O2 Ca1 O3 140.3(2) 6_556 5_676 ?
 O3 Ca1 Ca1 53.15(9) 5_666 1_545 ?
 O3 Ca1 Ca1 126.85(9) 5_666 1_565 ?
 O3 Ca1 Ca1 126.85(9) 5_676 1_545 ?
 O3 Ca1 Ca1 53.15(9) 5_676 1_565 ?
 O3 Ca1 Cr2 43.14(12) 5_676 5_666 ?
 O3 Ca1 Cr2 43.14(12) 5_666 5_666 ?
 O3 Ca1 Cr2 105.32(16) 5_666 2_564 ?
 O3 Ca1 Cr2 105.32(16) 5_676 2_564 ?
 O3 Ca1 O1 72.00(19) 5_666 2_564 ?
 O3 Ca1 O1 72.00(19) 5_676 2_564 ?
 O3 Ca1 O1 71.26(18) 5_676 5_666 ?
 O3 Ca1 O1 71.26(18) 5_666 5_666 ?
 O3 Ca1 O3 73.70(18) 5_666 5_676 ?
 O4 Ca1 Ca1 129.07(10) 1_565 1_545 ?
 O4 Ca1 Ca1 50.93(10) 1_565 1_565 ?
 O4 Ca1 Ca1 50.93(10) . 1_545 ?
 O4 Ca1 Ca1 129.07(10) . 1_565 ?
 O4 Ca1 Cr2 112.13(15) 1_565 2_564 ?
 O4 Ca1 Cr2 103.47(16) . 5_666 ?
 O4 Ca1 Cr2 103.48(16) 1_565 5_666 ?
 O4 Ca1 Cr2 112.13(15) . 2_564 ?
 O4 Ca1 O1 137.24(13) . 2_564 ?
 O4 Ca1 O1 71.11(18) . 5_666 ?
 O4 Ca1 O1 137.24(13) 1_565 2_564 ?
 O4 Ca1 O1 71.12(18) 1_565 5_666 ?
 O4 Ca1 O2 72.59(18) 1_565 6_566 ?
 O4 Ca1 O2 119.4(2) 1_565 6_556 ?
 O4 Ca1 O2 119.4(2) . 6_566 ?
 O4 Ca1 O2 72.59(18) . 6_556 ?
 O4 Ca1 O3 142.3(2) 1_565 5_666 ?
 O4 Ca1 O3 92.03(17) . 5_666 ?
 O4 Ca1 O3 92.03(17) 1_565 5_676 ?
 O4 Ca1 O3 142.3(2) . 5_676 ?
 O4 Ca1 O4 78.1(2) . 1_565 ?
 Ca1 Cr1 Ca1 124.50(5) . 5_676 ?
 Cr1 Cr1 Ca1 84.58(9) 5_666 5_676 ?
 Cr1 Cr1 Ca1 90.0 1_565 . ?
 Cr1 Cr1 Ca1 116.18(4) 1_545 5_676 ?
 Cr1 Cr1 Ca1 66.30(9) 5_666 . ?
 Cr1 Cr1 Ca1 58.19(7) 5_676 5_676 ?
 Cr1 Cr1 Ca1 66.30(9) 5_676 . ?
 Cr1 Cr1 Ca1 63.82(4) 1_565 5_676 ?
 Cr1 Cr1 Ca1 90.0 1_545 . ?
 Cr1 Cr1 Cr1 180.0 1_565 1_545 ?
 Cr1 Cr1 Cr1 58.72(8) 5_666 5_676 ?
 Cr1 Cr1 Cr1 119.36(4) 1_545 5_676 ?
 Cr1 Cr1 Cr1 119.36(4) 1_565 5_666 ?
 Cr1 Cr1 Cr1 60.64(4) 1_545 5_666 ?
 Cr1 Cr1 Cr1 60.64(4) 1_565 5_676 ?
 O1 Cr1 Ca1 131.37(13) 1_565 . ?
 O1 Cr1 Ca1 48.19(17) 1_565 5_676 ?
 O1 Cr1 Ca1 89.65(17) . 5_676 ?
 O1 Cr1 Ca1 131.37(13) . . ?
 O1 Cr1 Cr1 138.46(13) . 1_565 ?
 O1 Cr1 Cr1 41.54(13) . 1_545 ?
 O1 Cr1 Cr1 86.60(16) . 5_666 ?
 O1 Cr1 Cr1 132.43(19) . 5_676 ?
 O1 Cr1 Cr1 138.46(13) 1_565 1_545 ?
 O1 Cr1 Cr1 86.60(16) 1_565 5_676 ?
 O1 Cr1 Cr1 132.43(19) 1_565 5_666 ?
 O1 Cr1 Cr1 41.54(13) 1_565 1_565 ?
 O1 Cr1 O1 96.9(3) . 1_565 ?
 O1 Cr1 O3 93.6(2) 1_565 6_557 ?
 O1 Cr1 O3 93.6(2) . 6_557 ?
 O1 Cr1 O4 173.2(2) 1_565 . ?
 O1 Cr1 O4 83.89(18) 1_565 1_565 ?
 O1 Cr1 O4 173.2(2) . 1_565 ?
 O1 Cr1 O4 83.89(18) . . ?
 O1 Cr1 O4 91.0(2) 1_565 5_666 ?
 O1 Cr1 O4 91.0(2) . 5_666 ?
 O3 Cr1 Ca1 141.73(13) 6_557 5_676 ?
 O3 Cr1 Ca1 79.84(17) 6_557 . ?
 O3 Cr1 Cr1 133.66(13) 6_557 5_676 ?
 O3 Cr1 Cr1 133.66(13) 6_557 5_666 ?
 O3 Cr1 Cr1 90.000(1) 6_557 1_545 ?
 O3 Cr1 Cr1 90.000(1) 6_557 1_565 ?
 O4 Cr1 Ca1 85.85(16) 1_565 5_676 ?
 O4 Cr1 Ca1 93.16(19) 5_666 . ?
 O4 Cr1 Ca1 125.15(17) . 5_676 ?
 O4 Cr1 Ca1 48.97(14) 1_565 . ?
 O4 Cr1 Ca1 48.97(14) . . ?
 O4 Cr1 Ca1 43.43(14) 5_666 5_676 ?
 O4 Cr1 Cr1 41.40(12) 5_666 5_676 ?
 O4 Cr1 Cr1 40.78(16) 1_565 5_676 ?
 O4 Cr1 Cr1 42.74(13) . 1_545 ?
 O4 Cr1 Cr1 90.0 5_666 1_565 ?
 O4 Cr1 Cr1 137.26(13) . 1_565 ?
 O4 Cr1 Cr1 41.40(12) 5_666 5_666 ?
 O4 Cr1 Cr1 40.77(16) . 5_666 ?
 O4 Cr1 Cr1 87.87(16) . 5_676 ?
 O4 Cr1 Cr1 42.74(13) 1_565 1_565 ?
 O4 Cr1 Cr1 90.0 5_666 1_545 ?
 O4 Cr1 Cr1 137.26(13) 1_565 1_545 ?
 O4 Cr1 Cr1 87.87(16) 1_565 5_666 ?
 O4 Cr1 O3 173.0(2) 5_666 6_557 ?
 O4 Cr1 O3 93.1(2) 1_565 6_557 ?
 O4 Cr1 O3 93.1(2) . 6_557 ?
 O4 Cr1 O4 82.2(2) 5_666 . ?
 O4 Cr1 O4 94.5(3) 1_565 . ?
 O4 Cr1 O4 82.2(2) 5_666 1_565 ?
 Ca1 Cr2 Ca1 114.50(8) 5_666 2_565 ?
 Ca1 Cr2 Cr2 90.0 2_565 1_545 ?
 Ca1 Cr2 Cr2 149.37(5) 5_666 5_657 ?
 Ca1 Cr2 Cr2 90.0 5_666 1_565 ?
 Ca1 Cr2 Cr2 76.73(8) 2_565 5_667 ?
 Ca1 Cr2 Cr2 90.0 2_565 1_565 ?
 Ca1 Cr2 Cr2 76.73(8) 2_565 5_657 ?
 Ca1 Cr2 Cr2 90.0 5_666 1_545 ?
 Ca1 Cr2 Cr2 149.37(5) 5_666 5_667 ?
 Cr2 Cr2 Cr2 119.33(4) 1_545 5_667 ?
 Cr2 Cr2 Cr2 60.67(4) 1_565 5_667 ?
 Cr2 Cr2 Cr2 119.33(4) 1_565 5_657 ?
 Cr2 Cr2 Cr2 60.67(4) 1_545 5_657 ?
 Cr2 Cr2 Cr2 58.66(9) 5_667 5_657 ?
 Cr2 Cr2 Cr2 180.0 1_565 1_545 ?
 O1 Cr2 Ca1 56.94(17) . 2_565 ?
 O1 Cr2 Ca1 57.56(18) . 5_666 ?
 O1 Cr2 Cr2 90.000(1) . 1_545 ?
 O1 Cr2 Cr2 125.43(16) . 5_657 ?
 O1 Cr2 Cr2 90.001(1) . 1_565 ?
 O1 Cr2 Cr2 125.43(16) . 5_667 ?
 O1 Cr2 O2 86.0(2) . 5_656 ?
 O1 Cr2 O2 86.0(2) . 5_666 ?
 O1 Cr2 O3 92.1(2) . . ?
 O1 Cr2 O3 92.1(2) . 1_545 ?
 O2 Cr2 Ca1 105.32(18) 1_556 2_565 ?
 O2 Cr2 Ca1 122.22(16) 5_666 5_666 ?
 O2 Cr2 Ca1 140.17(19) 1_556 5_666 ?
 O2 Cr2 Ca1 52.84(14) 5_656 2_565 ?
 O2 Cr2 Ca1 122.22(16) 5_656 5_666 ?
 O2 Cr2 Ca1 52.84(15) 5_666 2_565 ?
 O2 Cr2 Cr2 89.999(1) 1_556 1_545 ?
 O2 Cr2 Cr2 40.59(18) 5_656 5_657 ?
 O2 Cr2 Cr2 42.78(13) 5_666 1_565 ?
 O2 Cr2 Cr2 42.78(13) 5_656 1_545 ?
 O2 Cr2 Cr2 89.999(1) 1_556 1_565 ?
 O2 Cr2 Cr2 137.22(13) 5_666 1_545 ?
 O2 Cr2 Cr2 41.37(12) 1_556 5_657 ?
 O2 Cr2 Cr2 41.37(12) 1_556 5_667 ?
 O2 Cr2 Cr2 87.68(17) 5_666 5_657 ?
 O2 Cr2 Cr2 87.68(17) 5_656 5_667 ?
 O2 Cr2 Cr2 137.22(13) 5_656 1_565 ?
 O2 Cr2 Cr2 40.59(18) 5_666 5_667 ?
 O2 Cr2 O1 162.3(3) 1_556 . ?
 O2 Cr2 O2 94.4(3) 5_656 5_666 ?
 O2 Cr2 O2 82.0(2) 1_556 5_666 ?
 O2 Cr2 O2 82.0(2) 1_556 5_656 ?
 O2 Cr2 O3 86.05(19) 5_656 1_545 ?
 O2 Cr2 O3 86.05(19) 5_666 . ?
 O2 Cr2 O3 178.1(2) 5_656 . ?
 O2 Cr2 O3 100.0(2) 1_556 . ?
 O2 Cr2 O3 100.0(2) 1_556 1_545 ?
 O2 Cr2 O3 178.1(2) 5_666 1_545 ?
 O3 Cr2 Ca1 56.08(14) 1_545 5_666 ?
 O3 Cr2 Ca1 126.45(15) . 2_565 ?
 O3 Cr2 Ca1 56.07(14) . 5_666 ?
 O3 Cr2 Ca1 126.45(15) 1_545 2_565 ?
 O3 Cr2 Cr2 141.35(17) 1_545 5_667 ?
 O3 Cr2 Cr2 43.30(13) 1_545 1_545 ?
 O3 Cr2 Cr2 136.70(13) . 1_545 ?
 O3 Cr2 Cr2 136.70(13) 1_545 1_565 ?
 O3 Cr2 Cr2 43.30(13) . 1_565 ?
 O3 Cr2 Cr2 93.90(15) 1_545 5_657 ?
 O3 Cr2 Cr2 141.35(17) . 5_657 ?
 O3 Cr2 Cr2 93.90(15) . 5_667 ?
 O3 Cr2 O3 93.4(3) 1_545 . ?
 Ca1 O1 Ca1 161.4(2) 2_565 5_666 ?
 Cr1 O1 Ca1 95.91(19) . 5_666 ?
 Cr1 O1 Ca1 96.4(2) . 2_565 ?
 Cr1 O1 Ca1 95.91(19) 1_545 5_666 ?
 Cr1 O1 Ca1 96.4(2) 1_545 2_565 ?
 Cr1 O1 Cr1 96.9(3) . 1_545 ?
 Cr1 O1 Cr2 131.53(13) 1_545 . ?
 Cr1 O1 Cr2 131.53(13) . . ?
 Cr2 O1 Ca1 80.3(2) . 5_666 ?
 Cr2 O1 Ca1 81.1(2) . 2_565 ?
 Ca1 O2 Ca1 77.6(2) 6_656 6_646 ?
 Cr2 O2 Ca1 116.7(2) 1_554 6_656 ?
 Cr2 O2 Ca1 116.7(2) 1_554 6_646 ?
 Cr2 O2 Ca1 84.27(12) 5_656 6_646 ?
 Cr2 O2 Ca1 145.1(3) 5_656 6_656 ?
 Cr2 O2 Ca1 84.27(12) 5_666 6_656 ?
 Cr2 O2 Ca1 145.1(3) 5_666 6_646 ?
 Cr2 O2 Cr2 98.0(2) 1_554 5_666 ?
 Cr2 O2 Cr2 98.0(2) 1_554 5_656 ?
 Cr2 O2 Cr2 94.4(3) 5_656 5_666 ?
 Ca1 O3 Ca1 73.70(18) 5_666 5_676 ?
 Cr1 O3 Ca1 96.1(2) 6_657 5_676 ?
 Cr1 O3 Ca1 96.1(2) 6_657 5_666 ?
 Cr1 O3 Cr2 122.80(19) 6_657 . ?
 Cr1 O3 Cr2 122.80(19) 6_657 1_565 ?
 Cr2 O3 Ca1 135.5(3) 1_565 5_666 ?
 Cr2 O3 Ca1 80.79(12) 1_565 5_676 ?
 Cr2 O3 Ca1 135.5(3) . 5_676 ?
 Cr2 O3 Ca1 80.79(12) . 5_666 ?
 Cr2 O3 Cr2 93.4(3) . 1_565 ?
 Ca1 O4 Ca1 78.1(2) 1_545 . ?
 Cr1 O4 Ca1 90.68(10) . . ?
 Cr1 O4 Ca1 100.9(2) 5_666 . ?
 Cr1 O4 Ca1 159.7(3) 1_545 . ?
 Cr1 O4 Ca1 100.9(2) 5_666 1_545 ?
 Cr1 O4 Ca1 159.7(3) . 1_545 ?
 Cr1 O4 Ca1 90.68(10) 1_545 1_545 ?
 Cr1 O4 Cr1 97.8(2) 5_666 . ?
 Cr1 O4 Cr1 97.8(2) 5_666 1_545 ?
 Cr1 O4 Cr1 94.5(3) 1_545 . ?

_shelx_res_file
;
TITL CaCr2O4_Hatrurim
    cacr2o4_hatrurim.res
    created by SHELXL-2018/3 at 12:44:29 on 05-Aug-2019
CELL 0.71073 8.8681 2.8849 10.3548 90 90 90
ZERR 4 0.009 0.003 0.011 0 0 0
LATT 1
SYMM 0.5-X,-Y,0.5+Z
SYMM -X,0.5+Y,-Z
SYMM 0.5+X,0.5-Y,0.5-Z
SFAC Ca Cr O
UNIT 4 8 16

L.S. 20
PLAN  10
LIST 6
fmap 2
acta
OMIT -4 54
OMIT 1 0 2
OMIT 2 0 0
OMIT 3 0 3
REM <olex2.extras>
REM <HklSrc "%.\\CaCr2O4_Hatrurim.hkl">
REM </olex2.extras>

WGHT    0.117200    1.010700
FVAR       1.11438
CA1   1    0.258904    0.750000    0.341624    10.50000    0.02202    0.03145 =
         0.01327    0.00000   -0.00068    0.00000
CR1   2    0.417059    0.750000    0.601420    10.50000    0.01811    0.02085 =
         0.00912    0.00000   -0.00019    0.00000
CR2   2    0.560638    0.250000    0.887439    10.50000    0.01957    0.02004 =
         0.00940    0.00000    0.00015    0.00000
O1    3    0.472942    0.250000    0.715166    10.50000    0.02137    0.02043 =
         0.00605    0.00000    0.00221    0.00000
O2    3    0.582759    0.250000    0.073327    10.50000    0.01758    0.02673 =
         0.00951    0.00000    0.00134    0.00000
O3    3    0.704253    0.750000    0.841551    10.50000    0.01719    0.02062 =
         0.01160    0.00000    0.00127    0.00000
O4    3    0.383727    0.250000    0.475882    10.50000    0.01974    0.02142 =
         0.00983    0.00000    0.00399    0.00000
HKLF 4


REM  CaCr2O4_Hatrurim
REM wR2 = 0.1572, GooF = S = 1.105, Restrained GooF = 1.105 for all data
REM R1 = 0.0588 for 312 Fo > 4sig(Fo) and 0.0627 for all 348 data
REM 43 parameters refined using 0 restraints

END

WGHT      0.1172      1.0107

REM Highest difference peak  1.563,  deepest hole -1.834,  1-sigma level  0.543
Q1    1   0.5121 -0.0180  0.8967  11.00000  0.05    1.56
Q2    1   0.2916  1.0333  0.3096  11.00000  0.05    1.55
Q3    1   0.3607  1.0124  0.6076  11.00000  0.05    1.42
Q4    1   0.6334  0.0026  0.8734  11.00000  0.05    1.42
Q5    1   0.4414  1.0443  0.5610  11.00000  0.05    1.35
Q6    1   0.2254  1.0198  0.3081  11.00000  0.05    1.25
Q7    1   0.4658  0.9949  0.6159  11.00000  0.05    1.23
Q8    1   0.3258  0.0120  0.4817  11.00000  0.05    1.05
Q9    1   0.4722  0.0373  0.7412  11.00000  0.05    0.94
Q10   1   0.2063  1.0130  0.3651  11.00000  0.05    0.92
;
_shelx_res_checksum                77071
_shelx_hkl_file
;
   0   0  -2 798.625 9.23800   2
   0   0  -2 654.515 16.3520   1
   0   0   3 4.82478 5.72043   1
   0   0  -3 5.42268 4.59096   2
   0   0  -3 0.43440 5.93020   4
   0   0  -3 0.10727 13.3082   1
   0   0  -4 41281.9 159.854   1
   0   0  -4 41524.3 113.084   4
   0   0  -5-0.55767 6.52397   2
   0   0   5 4.27751 8.56175   1
   0   0  -6 854.082 20.8756   4
   0   0  -6 818.899 30.5208   1
   0   0  -7 18.5986 16.9270   1
   0   0   7 2.57952 8.08525   1
   0   0  -7 6.78793 7.71553   2
   0   0  -7 4.14827 8.20872   4
   0   0  -8 2390.42 49.5899   1
   0   0  -8 2532.95 39.7698   4
   0   0   9 10.9031 10.2702   1
   0   0  -9 4.58605 9.38492   2
   0   0  -9-6.61706 15.5799   1
   0   0  -9-3.05821 9.13354   4
   0   0  10 1640.55 39.2078   1
   0   0 -10 1698.56 38.8021   4
   0   0  11 20.4103 12.7740   1
   0   0 -11 23.2485 13.4768   4
   0   0 -11 8.10794 11.8968   2
   0   0 -12 101.632 19.8082   4
   0   0  12 79.3070 16.3143   1
   0   0  13-7.59321 18.9924   1
   0   0 -13 26.7141 18.6455   4
   0   0 -13-3.12107 16.7666   2
   0   0 -14 1346.18 58.5913   4
   0   0 -15 42.8358 26.3854   2
   0   0 -17 253.543 104.964   2
   1   0  -1 9.36684 8.06488   1
  -1   0   1 10.5236 7.70809   2
   1   0  -1-0.93147 4.74157   2
  -1   0   1 8.57019 4.25500   1
   1   0  -2 1492.98 16.3354   4
  -1   0  -3 526.550 7.10903   2
   1   0   3 393.993 9.45413   1
   1   0  -4 1587.69 22.0047   4
  -1   0  -4 1468.17 14.0776   2
   1   0  -5 2580.94 31.0800   4
  -1   0  -5 2302.10 19.7001   2
   1   0  -6 2192.86 54.4020   1
   1   0  -6 2259.91 31.7990   4
  -1   0  -6 2151.03 22.3692   2
  -1   0  -6 2234.91 35.1822   4
   1   0  -7 627.738 20.7311   4
   1   0  -7 654.366 35.1981   1
  -1   0  -7 613.833 20.4280   4
   1   0  -8 4911.61 48.5482   2
  -1   0   8 4684.92 56.6430   1
  -1   0  -8 4905.28 40.7434   2
  -1   0  -8 5220.49 56.6941   4
   1   0  -8 5177.12 83.6465   1
   1   0  -8 5523.65 60.3806   4
   1   0  -9 94.6496 14.0805   4
   1   0  -9 92.7700 23.6239   1
  -1   0 -10 520.280 22.5507   4
   1   0 -10 538.220 33.9919   1
   1   0 -10 523.250 24.7645   4
  -1   0  10 436.707 21.7187   1
   1   0 -11 122.416 16.4467   4
  -1   0 -11 128.577 15.5901   4
   1   0  12 1046.03 36.7226   1
   1   0 -12 1088.51 39.7074   4
  -1   0  12 1211.99 43.9322   1
  -1   0 -12 1175.59 39.8089   4
  -1   0 -13 57.9173 22.0120   4
   1   0 -13 111.238 19.9517   2
  -1   0 -14 192.232 31.9044   4
  -1   0  14 317.836 38.1549   1
  -1   0  15 438.862 51.6747   1
  -2   0   0 7652.20 28.1757   3
  -2   0   0 7335.43 36.0079   2
  -2   0  -1 18.2448 5.30837   2
  -2   0   1 6.37376 10.9565   2
  -2   0   1 16.3168 6.54104   1
  -2   0  -1 7.87897 5.10510   3
   2   0  -1 1.09970 8.02763   2
   2   0  -1 7.14403 11.7658   1
  -2   0   2 3450.26 31.2033   1
  -2   0   2 3254.23 33.0030   2
  -2   0  -3 364.190 4.21201   2
  -2   0  -4 373.515 6.54088   2
   2   0   4 313.703 7.85422   1
   2   0   5 1183.55 19.0857   1
   2   0  -5 1021.00 36.4814   1
  -2   0  -6 18601.8 58.4260   2
   2   0  -6 19913.0 100.321   4
   2   0  -6 12689.9 126.683   1
  -2   0  -7 1127.30 16.5622   2
  -2   0   7 1025.63 29.1088   1
   2   0  -7 1081.96 46.1997   1
   2   0  -7 1093.23 26.8774   4
  -2   0  -7 1059.51 28.4333   4
  -2   0   8 1459.37 35.8386   1
   2   0   8 1359.10 27.6185   1
   2   0  -8 1391.04 32.6653   4
  -2   0  -8 1568.66 34.9164   4
  -2   0  -8 1513.30 21.1330   2
   2   0  -8 1487.22 54.8113   1
   2   0  -8 1358.58 29.5248   2
   2   0  -9 1991.84 61.8608   1
  -2   0  -9 2035.82 40.2902   4
  -2   0  -9 1996.69 26.8548   2
   2   0  -9 1842.72 38.7833   4
   2   0   9 1862.23 34.0784   1
  -2   0   9 1788.07 41.6152   1
  -2   0  10 5028.38 71.2009   1
   2   0 -10 5271.49 97.0043   1
  -2   0  11 59.8020 15.2460   1
   2   0 -11 83.2521 15.6448   2
  -2   0 -11 65.0028 14.8842   4
   2   0 -11 75.8668 25.8003   1
  -2   0 -12 1315.06 40.8610   4
  -2   0  12 1351.31 46.2665   1
   2   0 -13 88.0755 21.7327   2
  -2   0 -13 35.9831 18.2989   4
  -2   0  13 47.7076 20.7941   1
  -2   0 -13 61.0723 15.0112   2
  -2   0 -14 681.211 44.3056   4
  -2   0  14 574.338 43.7701   1
  -2   0 -15 52.8362 24.3319   2
  -2   0 -15 83.8162 38.2957   4
   2   0 -15 51.6534 37.8758   2
  -2   0 -16 7.48718 72.7500   4
  -2   0 -16 91.6358 38.0680   2
  -2   0 -17-4.16043 73.5575   2
  -3   0   0-0.56339 7.30555   2
  -3   0   0 2.26890 4.72546   3
  -3   0   0-4.49951 6.07474   2
  -3   0   0-1.82155 4.99520   1
   3   0   0 1.38820 10.6665   1
  -3   0  -1 1496.63 18.2991   3
  -3   0   1 1328.35 20.4310   2
  -3   0   1 1368.08 12.4484   3
  -3   0  -1 1235.22 14.1735   2
   3   0   1 1160.64 19.8571   1
   3   0  -1 1136.66 17.2630   2
  -3   0   1 1333.01 18.5630   1
   3   0  -2 35934.8 107.017   2
  -3   0   2 36318.7 110.699   2
   3   0  -3 507.528 17.5373   2
   3   0  -3 363.562 21.6886   1
  -3   0   3 440.866 18.6323   2
  -3   0   3 507.814 17.3481   1
  -3   0  -3 424.834 5.30069   2
   3   0  -4 27.9781 16.6884   1
  -3   0  -4 55.3311 2.67139   2
  -3   0   5 1148.06 27.6548   1
   3   0   5 924.590 13.7170   1
  -3   0   5 1132.35 29.1020   2
  -3   0  -5 1126.33 9.79585   2
   3   0  -5 814.658 36.2833   1
   3   0  -5 1315.23 27.5611   2
   3   0   6 9981.92 52.6574   1
   3   0  -6 9534.96 118.162   1
   3   0   7 230.661 10.3557   1
  -3   0   7 249.363 17.0151   1
   3   0  -8 2424.11 75.8735   1
  -3   0   8 2047.64 43.9085   1
   3   0   8 2162.39 33.8399   1
  -3   0  -8 2860.90 26.4668   2
  -3   0  -8 2611.19 47.8396   4
  -3   0  -9 149.289 9.38010   2
  -3   0  -9 116.432 14.9638   4
  -3   0   9 116.180 15.0552   1
  -3   0 -10 433.168 14.0994   2
   3   0 -10 445.357 38.7215   1
  -3   0 -10 398.569 22.7776   4
   3   0 -11 10.0775 27.2578   1
  -3   0 -11 19.9850 13.3300   4
  -3   0  11 15.4750 14.0500   1
   3   0 -11 48.8292 15.7801   2
  -3   0  12 1395.24 46.2083   1
   3   0 -12 1348.73 58.0974   1
  -3   0 -12 1529.90 46.2177   4
  -3   0 -13 105.974 19.7567   4
  -3   0  13 198.442 25.4199   1
   3   0 -13 205.227 30.0621   1
   3   0 -13 166.764 26.5413   2
  -3   0  14 159.415 27.6773   1
  -3   0 -14 73.9239 27.0913   4
   3   0 -14 162.735 36.3496   2
  -3   0 -15 10.3228 21.7872   2
  -3   0  15 17.5343 37.8418   1
  -3   0 -15-25.2927 38.6830   4
  -3   0  16 4569.21 182.981   1
  -3   0 -16 4069.41 172.192   4
  -3   0  17 499.977 279.094   1
  -3   0 -17-311.029 258.085   4
  -4   0   0 366.617 10.1170   3
  -4   0   0 176.794 6.20133   1
  -4   0  -1 2223.05 24.3281   3
   4   0   1 1785.11 30.0770   1
   4   0  -1 2119.01 41.2431   1
  -4   0  -1 1917.32 20.4989   2
  -4   0   1 2289.41 19.8580   3
  -4   0   2 5578.37 24.0848   3
  -4   0   2 7430.65 52.5167   1
  -4   0  -2 6153.87 27.3085   2
   4   0   2 6941.69 44.3483   1
   4   0  -2 6984.33 48.9713   2
   4   0  -3 72.6800 11.9351   2
  -4   0   3 92.1930 10.1090   1
   4   0  -3 57.7042 16.3346   1
  -4   0  -3 58.1123 4.78166   2
  -4   0  -3 78.4774 4.07895   2
  -4   0   4 289.267 16.5766   1
   4   0  -4 219.941 22.3598   1
  -4   0   4 272.322 17.5604   2
  -4   0  -4 230.472 4.30008   2
  -4   0  -5 85.9401 3.52111   2
  -4   0   6 3017.06 44.4339   2
  -4   0  -6 3270.04 17.6491   2
   4   0   6 2815.07 26.4192   1
  -4   0   6 3060.06 49.7059   1
   4   0  -6 3028.14 74.3101   1
  -4   0  -7 247.001 7.80101   2
  -4   0   7 218.326 17.3287   1
   4   0  -8 142.076 32.8528   1
  -4   0   8 113.301 14.5987   1
  -4   0  -8 126.779 16.2435   4
  -4   0  -8 174.344 8.04164   2
  -4   0  -9 683.376 14.0788   2
  -4   0  -9 603.154 27.5269   4
   4   0  -9 640.430 47.7107   1
  -4   0 -10 1317.76 39.7472   4
  -4   0 -10 1426.80 21.2906   2
   4   0 -10 1263.69 57.2758   1
   4   0 -11 730.931 31.6283   2
   4   0 -11 650.338 47.0224   1
  -4   0 -11 660.541 30.4507   4
  -4   0  11 631.824 30.8702   1
  -4   0 -11 737.771 18.6027   2
   4   0 -12 75.5774 22.5986   2
   4   0 -12 52.5616 28.0710   1
  -4   0 -12 118.518 19.3420   4
  -4   0  12 99.5314 19.3508   1
  -4   0 -13 110.621 21.7524   4
   4   0 -13 157.400 33.5781   1
  -4   0 -13 154.620 14.3854   2
  -4   0  13 189.225 26.6231   1
   4   0 -14 248.620 32.8377   1
  -4   0 -14 188.026 33.6760   4
  -4   0 -15 694.331 62.2345   4
  -4   0  15 1047.21 78.9942   1
  -4   0  16 68.3145 81.7283   1
  -4   0 -16 109.158 32.7650   2
  -4   0 -16 132.040 82.9861   4
  -5   0   0 28.4792 8.87717   2
  -5   0   0 0.34223 4.63060   1
  -5   0   0 6.26996 4.81638   3
  -5   0   0 6.89260 8.37317   2
   5   0   0 1.84884 13.4275   1
  -5   0  -1 1088.39 18.9948   3
  -5   0   1 1034.48 21.4697   2
  -5   0   1 1074.91 15.9077   3
  -5   0   1 943.539 18.6745   1
   5   0  -1 926.882 30.6899   1
   5   0   1 916.101 26.1230   1
  -5   0   2 2677.58 21.8825   3
  -5   0   2 2613.43 33.8466   1
   5   0   2 2650.37 36.8162   1
   5   0  -2 2439.79 47.9584   1
  -5   0  -2 2587.22 22.0605   2
  -5   0   3 28.2582 3.21159   3
  -5   0   3 41.0592 11.3891   2
   5   0  -3 25.8569 10.0847   2
  -5   0   3 26.4593 8.60568   1
  -5   0  -3 31.2660 4.42948   2
   5   0  -3 25.2616 15.3684   1
   5   0  -4 2220.77 55.2166   1
   5   0   4 2886.12 26.4614   1
  -5   0   4 2416.65 41.6923   1
  -5   0  -4 2628.49 16.0887   2
   5   0   5 411.649 11.0743   1
  -5   0  -5 314.249 5.25772   2
  -5   0   6 996.110 26.2602   2
   5   0  -6 1246.16 52.0318   1
  -5   0   6 1305.14 35.9731   1
  -5   0  -6 1086.44 9.70758   2
  -5   0   7 50.7744 13.2950   2
   5   0  -7 25.9189 15.4184   2
  -5   0   7 61.5404 15.1970   1
   5   0  -7 36.7935 26.3463   1
  -5   0  -7 61.8720 4.69700   2
   5   0  -8 4699.50 108.097   1
  -5   0   8 4168.13 68.7703   1
  -5   0  -9 245.613 9.20263   2
  -5   0   9 211.929 19.9047   1
  -5   0  10 1914.42 49.9796   1
  -5   0 -10 2096.55 51.2821   4
   5   0 -10 1952.65 73.5338   1
  -5   0 -10 2167.49 24.5604   2
  -5   0 -11 335.957 12.2054   2
   5   0 -11 357.215 38.9017   1
  -5   0  11 348.822 26.5399   1
   5   0 -12 2094.40 78.4882   1
  -5   0 -12 2104.09 56.0020   4
  -5   0 -12 2151.14 30.4061   2
  -5   0 -13 29.8375 19.6236   4
  -5   0 -13 50.6722 10.9226   2
  -5   0  13 65.4179 24.8449   1
   5   0 -14 219.633 34.4788   1
  -5   0  14 371.659 41.4242   1
  -5   0 -15 419.403 59.0966   4
  -5   0  15 678.718 68.0827   1
  -5   0  16 1394.59 140.134   1
  -5   0 -16 940.766 130.473   4
  -6   0   0 16232.5 58.7601   1
  -6   0   0 16730.0 69.0001   2
  -6   0   1 1169.25 21.7543   2
  -6   0  -1 1221.63 18.8703   2
  -6   0   1 1084.98 20.4569   1
  -6   0   1 1274.74 18.8926   3
  -6   0  -1 1472.79 24.4669   3
   6   0   1 1129.33 29.5270   1
  -6   0  -1 1465.66 22.1558   2
   6   0  -1 1088.52 33.2509   1
  -6   0   2 647.745 18.4679   1
   6   0  -2 583.732 28.5734   1
   6   0   2 685.365 22.0052   1
  -6   0   2 676.106 12.5182   3
  -6   0   3 1368.00 16.4205   3
  -6   0  -3 1329.08 14.9049   2
  -6   0  -4 9063.19 33.6016   2
  -6   0   4 9122.61 40.3551   3
   6   0  -4 9264.12 112.319   1
  -6   0  -5 1768.44 13.0727   2
   6   0  -5 1921.75 57.7718   1
  -6   0   5 2025.19 42.4078   1
  -6   0   5 1622.37 31.3257   2
  -6   0   6 501.869 23.4105   1
  -6   0  -6 477.036 6.95497   2
   6   0  -6 530.923 39.4437   1
  -6   0   6 528.526 21.0113   2
  -6   0   7 533.188 23.9601   2
  -6   0   7 526.743 26.9693   1
  -6   0  -7 472.958 7.52175   2
  -6   0  -7 415.762 10.3417   2
   6   0  -7 527.013 42.2221   1
  -6   0   8 534.114 27.7509   1
   6   0  -8 564.523 45.5007   1
  -6   0  -8 632.250 10.1374   2
  -6   0   9 31.0037 16.2561   1
   6   0  -9 18.8672 32.0028   1
  -6   0  -9 31.1878 15.2036   4
  -6   0  -9 26.2547 6.07182   2
  -6   0 -10 577.254 13.0980   2
   6   0 -10 535.341 45.6355   1
  -6   0  10 426.460 27.5484   1
  -6   0 -10 440.271 27.2337   4
   6   0 -11-12.6857 27.9337   1
  -6   0 -11 7.22638 14.6005   4
  -6   0 -11 9.93288 7.22378   2
  -6   0  11 4.23028 16.8448   1
   6   0 -12 225.202 38.3763   1
  -6   0 -12 179.982 22.8449   4
  -6   0  12 250.345 27.1471   1
  -6   0  13 68.8549 25.6976   1
   6   0 -13 19.8652 30.2513   1
  -6   0 -13 34.2771 11.1739   2
  -6   0 -13 61.1063 23.1366   4
   6   0 -14 514.046 46.0208   1
  -6   0 -14 672.231 51.2630   4
   6   0 -15 115.501 24.9186   1
  -6   0 -15 81.2382 55.4635   4
  -7   0   0-3.60731 5.86980   3
  -7   0   0 19.1538 7.75278   2
   7   0   0 21.2155 14.1251   1
  -7   0   0-0.71510 10.3938   2
  -7   0   0 4.52979 4.40474   1
  -7   0   1 91.3492 5.84402   3
  -7   0   1 68.7359 6.26928   1
   7   0  -1 100.713 17.4183   1
   7   0   2 1763.52 39.0689   1
   7   0  -2 1638.43 47.2123   1
  -7   0   3-3.31684 8.72589   1
   7   0   3 12.6546 11.8537   1
  -7   0  -3-1.87760 7.47886   2
  -7   0  -3 6.65825 5.73336   2
  -7   0   3 7.06955 4.53161   3
  -7   0   4 708.709 21.0784   2
  -7   0   4 793.771 13.2167   3
   7   0  -4 761.663 37.2298   1
  -7   0  -4 709.498 11.2946   2
  -7   0   4 701.687 23.6089   1
  -7   0  -4 762.508 14.8849   2
   7   0  -5 21.0839 21.9919   1
  -7   0   5 6.91967 10.5577   2
  -7   0  -5 5.21355 6.17734   2
  -7   0  -5-1.36577 4.17570   2
  -7   0   5-0.13619 11.2518   1
  -7   0   6-7.47355 12.6056   1
  -7   0  -6 1.54547 3.05831   2
  -7   0  -6 9.43865 5.87508   2
   7   0  -6-6.54059 23.4895   1
  -7   0   6 5.59642 11.9735   2
  -7   0   7 45.9527 13.9321   2
   7   0  -7 35.6624 25.6790   1
  -7   0  -7 7.55489 5.96026   2
  -7   0   7 8.49848 14.4006   1
  -7   0  -7 10.8598 3.14711   2
  -7   0  -8 728.098 10.1959   2
   7   0  -8 835.826 55.5355   1
  -7   0   8 768.966 32.4189   1
  -7   0   9 43.5830 16.5375   1
   7   0  -9 63.4528 31.4056   1
  -7   0  -9 15.8478 16.0233   4
  -7   0  -9 20.7602 6.97424   2
  -7   0  10 14.1647 15.8409   1
  -7   0 -10-8.68334 15.8042   4
  -7   0 -10 16.8446 5.92062   2
   7   0 -10 6.08357 31.6040   1
  -7   0  11 172.704 20.3514   1
  -7   0 -11 141.409 20.7129   4
   7   0 -12 123.730 34.0325   1
  -7   0  12 130.640 21.8636   1
  -7   0 -12 56.4062 20.5519   4
  -7   0 -13 69.5304 26.5491   4
  -7   0  13 59.4637 24.7605   1
   7   0 -13 28.4448 32.4816   1
   7   0 -14 53.9406 28.3850   1
  -7   0 -14 90.4475 35.0750   4
  -7   0  14 134.158 38.5461   1
  -7   0 -15 233.601 61.5453   4
   7   0 -15 139.145 28.4445   1
  -8   0   0 975.920 20.9985   2
   8   0   0 1092.86 37.7412   1
   8   0   1-4.48494 15.0554   1
  -8   0   1 0.40811 8.46664   2
   8   0  -1-1.29658 17.3441   1
  -8   0  -1-4.76042 7.72793   2
  -8   0   1 4.48481 5.88464   1
  -8   0   1 6.37874 6.09098   3
  -8   0   2 240.987 9.30095   3
  -8   0  -2 351.048 15.2181   2
  -8   0   2 181.037 10.4332   1
   8   0   2 306.742 23.2303   1
   8   0  -2 238.289 23.5137   1
  -8   0   3 1492.51 30.7109   1
   8   0  -3 1527.34 49.3562   1
  -8   0  -3 1544.73 19.0357   2
  -8   0   3 1430.91 27.8761   2
  -8   0   4 1761.63 32.9013   2
  -8   0   4 1638.15 33.6568   1
  -8   0  -5 141.886 6.28377   2
  -8   0   5 135.233 14.8472   1
  -8   0   5 118.302 13.0547   2
  -8   0  -5 160.487 9.36243   2
   8   0  -5 172.379 28.4666   1
  -8   0   6 2466.13 41.4935   2
  -8   0   6 2325.83 46.4925   1
  -8   0  -6 2462.72 25.0043   2
  -8   0  -7 1274.52 12.5875   2
  -8   0   7 1343.54 38.2427   1
  -8   0  -7 1416.97 18.9259   2
  -8   0  -8 555.983 31.8222   4
   8   0  -8 579.361 47.7912   1
  -8   0   8 544.590 27.5541   1
  -8   0  -8 485.853 8.23705   2
  -8   0  -9 353.541 27.0537   4
  -8   0   9 355.505 24.4524   1
  -8   0  -9 398.066 9.06812   2
   8   0 -10 1475.51 69.7755   1
  -8   0 -10 1362.54 48.0084   4
  -8   0  10 1334.05 44.9405   1
  -8   0  11 285.322 27.1349   1
   8   0 -11 285.664 42.6269   1
  -8   0 -11 276.134 10.1813   2
   8   0 -12 142.642 37.0428   1
  -8   0  12 267.713 30.1602   1
  -8   0  13 180.325 31.2334   1
   8   0 -13 179.901 39.1703   1
  -8   0 -14 486.697 55.8931   4
   8   0 -14 315.224 39.2328   1
  -9   0   0 3.51609 8.22773   2
   9   0   1 1336.94 45.2872   1
   9   0  -1 1272.14 48.4784   1
  -9   0   1 1039.12 23.0673   2
  -9   0  -1 1055.36 20.5336   2
  -9   0   2 3038.97 38.9536   2
  -9   0  -2 2802.17 28.7222   2
  -9   0   3 306.017 16.1295   2
  -9   0  -3 231.762 9.07080   2
  -9   0   3 213.127 14.3542   1
   9   0  -3 287.763 29.4915   1
  -9   0   4-3.93587 10.9748   1
   9   0  -4-21.0436 24.9063   1
  -9   0   4 6.75656 10.9973   2
  -9   0  -4 3.33186 5.49552   2
  -9   0  -5 270.994 8.19656   2
  -9   0   5 258.915 18.5318   1
  -9   0   6 1116.32 32.6782   1
  -9   0  -6 1095.69 12.4769   2
  -9   0  -7 134.884 5.20177   2
  -9   0   7 169.743 18.6676   1
  -9   0  -8 9.54369 4.03236   2
  -9   0   8 16.9172 14.1132   1
   9   0  -8-0.58456 30.2041   1
  -9   0  -8 18.9627 17.0707   4
  -9   0  -9 252.050 26.6781   4
   9   0  -9 212.747 39.4101   1
  -9   0  -9 248.049 7.63760   2
  -9   0   9 220.472 20.9681   1
  -9   0 -10-2.47763 5.96617   2
  -9   0  10-4.52239 16.2104   1
  -9   0 -10-0.37774 18.6066   4
   9   0 -10 36.9909 33.1722   1
  -9   0 -11-26.4586 21.8545   4
  -9   0  11 13.6857 18.3254   1
  -9   0 -11 18.6565 5.78523   2
   9   0 -11-12.6830 35.1305   1
  -9   0 -12 268.841 35.5851   4
  -9   0  12 341.417 31.6987   1
   9   0 -12 387.684 49.9282   1
  -9   0  13 210.111 33.5605   1
 -10   0   0 188.155 11.4445   2
  10   0  -1 142.790 26.9044   1
  10   0  -2 119.757 28.6220   1
 -10   0   2 67.5751 10.6714   2
 -10   0   3 408.490 18.3285   2
 -10   0  -3 357.419 11.0044   2
 -10   0   4 301.574 17.7264   1
 -10   0   4 290.645 17.8370   2
 -10   0   5 2.63903 13.0708   2
  10   0  -5 8.97255 30.0503   1
 -10   0   5-1.83669 11.3331   1
  10   0  -6 182.398 41.6862   1
 -10   0   6 131.540 16.4373   1
 -10   0  -7 12.2453 3.89044   2
 -10   0  -7 23.2353 17.7707   4
  10   0  -7-3.20792 33.7851   1
 -10   0   7 23.0922 15.6294   1
 -10   0   8 92.9649 17.2712   1
 -10   0  -8 55.3974 20.6749   4
  10   0  -9-25.3681 36.7088   1
 -10   0   9-2.20294 16.2584   1
 -10   0  -9 11.2742 18.4149   4
  10   0 -10 75.4381 42.8738   1
 -10   0  10 50.4024 18.5109   1
 -10   0 -10 18.1583 18.8416   4
  10   0 -11 166.339 51.8383   1
 -10   0  11 94.8502 21.8652   1
 -10   0 -11 92.9115 25.4163   4
 -10   0 -12 1.39356 5.66794   2
 -10   0 -12 49.2088 24.3913   4
 -10   0  12 6.50996 19.4272   1
  10   0 -12 4.45887 42.4814   1
 -11   0   0 9.23023 8.23706   2
  11   0  -1 317.328 42.3700   1
  11   0  -2 151.742 40.1824   1
 -11   0  -3-6.31563 6.65086   2
  11   0  -3 16.2960 37.7675   1
 -11   0   4 1064.34 31.7915   2
 -11   0  -4 823.716 15.5813   2
 -11   0   5 1040.27 35.2613   2
  11   0  -5 1152.73 73.5436   1
 -11   0  -5 670.131 12.3335   2
 -11   0   5 750.084 27.0307   1
 -11   0  -5 676.618 35.3350   4
 -11   0  -6 288.118 8.25662   2
 -11   0   6 341.191 20.7749   1
 -11   0  -6 332.539 28.7536   4
 -11   0  -7-17.7679 21.1045   4
  11   0  -7 5.73690 42.6422   1
 -11   0   7 66.6628 17.1073   1
 -11   0  -7 24.4400 4.27528   2
 -11   0  -8 546.154 36.3149   4
 -11   0   8 559.298 27.8709   1
 -11   0  -8 592.923 10.3327   2
 -11   0  -9 741.679 11.1339   2
 -11   0  -9 721.362 38.2954   4
 -11   0   9 743.816 33.2435   1
 -11   0  10 356.246 24.2286   1
 -11   0 -10 331.609 30.9769   4
 -11   0 -10 422.193 9.94621   2
 -11   0  11 90.5575 17.0665   1
  11   0 -11 102.895 63.6506   1
 -12   0   0 537.887 18.6341   2
 -12   0  -1 396.731 15.3031   2
 -12   0   1 386.426 17.3913   2
  12   0  -2 14.4030 48.9642   1
 -12   0   2 16.4866 11.3798   2
  12   0  -3 215.578 55.3720   1
 -12   0   3 119.955 15.2378   2
 -12   0  -4 628.713 17.5042   2
 -12   0  -4 480.684 29.2755   4
 -12   0  -5 191.280 9.02497   2
 -12   0  -5 242.926 24.5794   4
  12   0  -6 96.1177 62.4491   1
 -12   0  -7 147.462 6.65765   2
 -12   0  -7 130.170 21.7818   4
  12   0  -8-0.68823 73.0111   1
 -12   0   8 4.17335 13.5829   1
 -12   0  -8 1.36764 17.0704   4
 -12   0  -8-1.54932 4.29597   2
 -12   0  -9-16.4268 19.1560   4
 -12   0  -9 0.51053 3.86487   2
 -12   0   9-5.46091 14.3355   1
 -12   0  10 43.9603 17.2959   1
 -12   0 -10 33.7425 18.4193   4
 -13   0   0-22.0634 13.3926   2
 -13   0   1 12.1179 14.7374   2
 -13   0  -1 33.0850 11.4621   2
 -13   0  -2 433.379 19.0657   2
  13   0  -3 1095.50 112.321   1
  13   0  -4 25.8156 78.1103   1
 -13   0   4 80.4580 25.3515   2
 -13   0  -4 13.2183 9.10222   2
  13   0  -5 419.904 104.870   1
 -13   0   5 186.270 35.6161   2
  13   0  -6 948.785 141.119   1
 -13   0  -7 24.6732 5.22977   2
 -13   0  -7 27.7243 17.1225   4
  13   0  -8 781.936 198.128   1
 -13   0  -8 77.8018 21.2118   4
 -14   0   0 109.226 23.2077   2
 -14   0  -2 40.7814 17.4658   2
 -14   0  -3 921.075 32.7968   2
 -14   0   4 597.695 66.1991   2
  14   0  -5 187.015 278.032   1
 -14   0  -5 26.1260 8.96348   2
  14   0  -6 4885.47 607.086   1
   0  -1   0-0.07184 6.64559   1
   0   1   0 0.63197 6.87960   2
   0   1   0-2.99209 9.70067   1
   0  -1   1 1964.85 18.7877   2
   0  -1  -1 1800.26 28.3050   1
   0   1  -2-6.39372 4.88406   3
   0   1  -2-3.31795 8.79486   1
   0  -1  -2 9.79958 10.0424   1
   0   1  -2-8.56085 6.70613   2
   0  -1   2 1.71301 7.71401   1
   0   1  -3 2525.74 34.3702   1
   0   1   3 3001.94 41.8156   1
   0  -1   3 3406.69 33.9256   1
   0   1  -3 2920.18 29.0808   3
   0  -1  -3 2979.31 28.5771   2
   0  -1  -4-3.14178 11.6572   1
   0   1  -4 6.06564 6.28448   2
   0  -1   4-7.65061 8.54642   1
   0   1  -4 14.5263 11.0771   1
   0   1  -4-9.57925 7.34503   2
   0   1  -4-7.31991 6.83967   3
   0   1   4-5.53537 9.80589   1
   0   1  -5 4070.23 38.8314   3
   0  -1   5 4275.96 48.9693   1
   0  -1  -6-0.17899 12.5641   1
   0   1   6 0.09252 10.4560   1
   0  -1  -7 24.5911 17.9979   1
   0  -1  -7 12.5146 8.17642   2
   0  -1   7 22.1477 10.5759   1
   0   1   7 20.2172 10.3151   1
   0   1  -7 35.3215 9.73956   1
   0  -1  -8 19.4963 7.60891   2
   0   1   8 3.56602 9.64550   1
   0  -1  -8 23.6393 20.0423   1
   0  -1   8 21.0922 11.5448   1
   0   1   9 968.542 29.3395   1
   0  -1   9 994.594 31.0937   1
   0  -1  10 2.96632 13.1214   1
   0   1 -10 18.4804 13.8177   2
   0  -1 -10 6.17191 8.24127   2
   0  -1 -10 10.3612 18.7653   1
   0   1  10 2.60949 12.4814   1
   0  -1 -11 3.24379 9.79086   2
   0  -1 -11 0.02789 10.4646   4
   0   1  11-11.5204 14.5272   1
   0  -1  11-3.31047 15.1347   1
   0  -1 -11-11.7571 21.9373   1
   0   1 -11 11.7229 13.4909   2
   0   1  12 50.4747 19.2783   1
   0  -1 -13 714.807 34.1839   4
   0   1 -14 2.57285 19.5768   2
   0   1  14 0.40715 27.9267   1
   0  -1 -14 8.41354 20.7640   2
   0   1  15 147.152 48.1899   1
   0  -1 -15 26.8929 34.5302   2
   0   1 -15 120.925 31.1106   2
   0   1 -16 15.3027 45.7914   2
   0  -1 -16 56.8351 66.0712   2
   0  -1 -17 324.324 249.400   2
   1   1   0 10.0194 7.41535   2
   1  -1   0-1.32069 4.95991   1
  -1   1   0-1.26206 6.90918   2
  -1  -1   0 0.73401 8.78198   1
  -1   1   0 6.18815 8.46916   1
   1  -1   0-3.53074 6.26338   2
   1   1   0 13.9301 10.7921   1
  -1  -1   0-4.81142 6.32866   2
   1  -1   1 461.671 12.3415   1
   1  -1  -1 464.230 16.3179   1
   1  -1  -1 618.660 13.1442   2
  -1   1   1 538.495 16.4714   1
  -1  -1   1 588.996 12.0038   2
   1   1   1 600.269 20.5830   1
   1   1   1 485.757 14.0385   2
   1   1  -1 593.269 22.1442   1
  -1   1  -1 462.691 12.7166   1
  -1  -1  -1 538.910 10.3241   2
  -1   1  -2 11620.1 54.5919   3
  -1  -1   2 12234.4 52.1012   2
   1   1   2 9910.01 67.6708   1
  -1  -1  -2 9609.11 41.2345   2
   1  -1  -2 8465.12 68.5265   1
  -1   1  -2 8474.60 40.4006   1
  -1   1   2 8648.35 61.4484   1
   1   1  -2 10011.1 37.2879   3
   1  -1  -2 12000.1 58.2609   2
  -1  -1   3 8808.23 49.5523   2
   1  -1  -3 7803.19 47.9633   2
   1  -1  -3 7061.99 73.7904   1
  -1   1  -3 7953.46 51.2808   3
   1  -1   3 8122.26 46.1695   1
  -1  -1  -3 7195.44 37.0367   2
  -1  -1  -3 9482.23 65.4882   1
   1   1  -3 8270.80 43.7127   3
   1   1   3 8228.34 66.8902   1
  -1   1   3 7719.73 63.6556   1
  -1   1   4 4079.77 48.5069   1
   1  -1  -4 4588.66 62.5170   1
  -1   1  -4 3093.93 26.8089   2
   1   1   4 4439.99 46.7879   1
  -1  -1  -4 4388.04 31.5979   2
   1   1  -4 3822.33 55.7587   1
   1  -1   4 4482.98 36.8025   1
   1   1  -4 4226.98 34.1142   3
  -1  -1   4 4932.88 47.0064   1
  -1  -1  -4 4654.86 45.8450   1
  -1   1  -4 4521.62 44.3355   3
   1  -1  -4 4463.62 37.5451   2
  -1   1  -4 3615.32 26.1411   2
   1   1  -5-4.51397 7.16168   3
  -1   1  -5-1.02801 5.30767   3
   1  -1   5-4.44807 8.27569   1
  -1  -1   5 0.30226 9.05129   1
  -1   1   5 16.2148 11.0202   1
   1   1  -5 10.1583 8.48918   2
  -1   1  -5 3.96791 5.01754   2
  -1  -1  -5-7.60705 6.16026   2
   1   1   5-3.90500 8.65468   1
   1  -1  -5-2.37726 18.7070   1
   1   1  -5 12.5094 16.2920   1
  -1  -1  -5-12.3836 15.2887   1
   1  -1  -6 6680.10 78.2543   1
  -1   1   6 7864.75 71.7913   1
   1   1  -6 6790.28 79.5221   1
  -1  -1  -6 7746.20 46.5722   2
  -1  -1   6 7613.58 68.6456   1
   1  -1   6 7582.75 60.3273   1
  -1  -1  -6 8955.01 76.1238   1
   1  -1  -6 7871.54 51.4366   2
  -1   1  -6 7495.98 63.9753   3
   1   1   7 1084.19 28.6264   1
   1  -1  -7 971.331 41.8044   1
  -1  -1  -7 990.067 19.2981   2
   1   1  -7 857.115 31.9867   1
  -1  -1   7 923.509 27.1427   1
   1  -1   7 876.668 23.2392   1
   1  -1  -7 992.528 22.9101   2
  -1   1   7 950.294 27.9923   1
   1   1   8 2346.57 42.4332   1
  -1   1   8 2170.71 45.0467   1
   1  -1   8 1954.77 36.5778   1
  -1  -1   8 1981.62 41.0552   1
   1   1  -8 1684.39 40.7715   1
   1  -1  -8 1962.08 56.3768   1
  -1  -1  -8 2038.58 28.5866   2
   1  -1  -9 921.618 22.5055   2
  -1  -1  -9 1002.86 20.9937   2
  -1   1   9 1070.63 32.9845   1
   1  -1   9 1082.95 30.3324   1
  -1  -1   9 1078.93 33.6270   1
   1   1   9 1214.89 32.0501   1
   1  -1  -9 1016.40 43.1175   1
  -1  -1  -9 1394.48 40.1401   1
   1   1  -9 729.914 25.1412   1
  -1  -1 -10 1655.02 46.6688   1
   1   1  10 1392.83 35.6352   1
  -1   1  10 1243.61 36.6257   1
   1  -1 -10 1093.89 43.6053   1
   1   1 -10 869.001 24.3891   1
   1  -1 -10 1016.40 26.9698   4
   1  -1  10 1361.64 36.3687   1
  -1  -1  10 1312.44 38.9144   1
   1   1 -11 54.5990 14.6501   2
  -1   1 -11 66.5808 15.5835   2
  -1   1  11 115.328 16.8718   1
  -1  -1  11 92.7472 18.4688   1
   1  -1 -11 77.6032 13.2142   2
   1   1  11 140.380 17.1207   1
   1  -1 -11 111.996 12.3493   4
  -1   1  12 4756.68 82.8340   1
   1  -1 -12 4426.10 64.3520   4
   1   1  12 5809.17 88.9879   1
  -1  -1 -12 4633.53 71.6999   4
  -1  -1  12 5437.84 92.8611   1
   1   1  13 949.580 45.2639   1
  -1  -1  13 945.730 49.4534   1
  -1  -1 -13 851.756 36.3040   4
  -1   1 -14 0.10802 18.4566   2
   1   1 -14 39.3050 21.5081   2
  -1   1  14 12.5323 25.0176   1
  -1  -1 -14 20.4874 18.6464   2
  -1  -1 -14 67.0492 27.5445   4
   1   1  14 61.5519 31.5885   1
   1  -1 -14 23.3724 25.2816   2
  -1   1  15 860.288 67.8089   1
  -1   1  16 3433.39 185.290   1
  -1   1  17 903.134 429.847   1
  -1  -1 -17 686.454 211.422   2
  -2   1   0 8475.23 45.7881   1
   2   1   0 8589.00 50.6771   2
  -2  -1   1-0.69111 6.64968   2
  -2  -1   1-1.17605 5.52491   1
  -2   1  -1 6.90564 6.39865   2
   2   1  -1-2.79397 13.0494   1
  -2   1  -1-6.24407 4.39365   1
   2   1  -1-2.02234 7.86732   2
  -2   1   1 8.26385 8.80669   1
   2  -1   1-1.42164 7.87640   1
  -2   1  -1 0.13594 5.13989   3
   2  -1  -1-5.90830 8.26802   2
   2  -1  -1-3.12911 9.50174   1
  -2  -1  -1 1.86833 9.16284   1
   2   1   2 588.912 19.3339   1
  -2   1  -2 622.611 15.2421   3
  -2  -1  -2 901.632 20.2812   1
  -2  -1   2 692.517 15.3063   2
   2  -1  -2 407.098 18.2158   1
   2  -1   2 636.326 13.1784   1
  -2  -1  -2 600.809 10.9268   2
  -2   1   2 603.987 19.6401   1
  -2   1  -2 354.850 9.23732   2
   2  -1  -2 597.294 15.6106   2
   2   1  -2 659.629 8.75795   3
  -2   1  -3 517.547 16.2438   3
   2  -1  -3 472.744 14.2013   2
   2  -1  -3 271.130 14.5362   1
  -2  -1  -3 871.714 22.4641   1
   2   1   3 641.128 21.6727   1
  -2   1  -3 337.289 9.04281   2
   2  -1   3 538.596 11.2290   1
  -2  -1   3 749.605 18.1756   2
  -2   1   3 556.214 20.1872   1
   2   1  -3 596.186 10.9055   3
  -2  -1  -3 596.521 11.6202   2
  -2   1  -3 333.205 6.07561   2
  -2  -1  -4 13854.9 73.7391   1
  -2   1  -4 12565.0 77.9701   3
  -2   1  -4 13391.3 99.4077   4
   2   1   4 13914.1 85.1479   1
   2  -1  -4 12657.1 71.3805   2
  -2  -1  -4 11211.7 45.0336   2
   2  -1   4 13308.8 57.3916   1
   2  -1  -4 11601.4 112.051   1
  -2  -1   4 13581.9 81.4619   1
  -2   1   4 12761.3 90.2858   1
   2   1  -4 14074.4 57.5005   3
   2   1  -5 105.467 18.4932   1
  -2   1  -5 148.995 6.16352   2
  -2  -1   5 156.859 12.9714   1
   2  -1  -5 194.767 24.8905   1
  -2  -1   5 304.628 16.4350   2
  -2   1   5 160.496 14.5164   1
  -2  -1  -5 182.845 8.11409   2
   2   1   5 238.301 15.4698   1
  -2   1  -5 143.025 17.4295   4
  -2  -1  -5 326.837 20.6476   1
   2  -1   5 167.757 8.91518   1
  -2   1  -5 145.522 8.39857   2
  -2   1  -5 151.459 10.7901   3
  -2   1  -6 4749.35 51.3826   3
  -2   1  -6 5692.48 76.6426   4
  -2   1   6 5501.06 64.3235   1
   2  -1  -6 5926.11 48.9152   2
  -2  -1   6 5613.21 61.5438   1
   2   1   6 5519.39 51.4439   1
  -2  -1  -6 6238.28 40.4689   2
   2   1  -6 4497.38 70.0002   1
   2  -1  -6 4985.31 79.1407   1
   2  -1   6 5538.91 44.6446   1
  -2   1   7 705.688 25.6071   1
   2   1  -7 664.392 31.4934   1
   2  -1  -7 759.923 20.5510   2
   2  -1   7 730.383 20.3472   1
  -2  -1  -7 779.383 16.2734   2
  -2   1  -7 789.945 19.9766   2
   2   1  -7 577.727 18.6613   2
   2   1   7 862.072 23.7533   1
  -2   1  -7 589.277 29.7186   4
  -2   1  -7 621.922 12.8752   2
   2  -1  -7 686.776 37.9502   1
  -2  -1   7 681.698 24.4072   1
  -2  -1  -8 959.168 19.7162   2
  -2   1   8 723.547 27.7617   1
   2   1  -8 687.552 21.3035   2
   2   1  -8 642.402 31.7487   1
  -2   1  -8 683.074 33.1445   4
   2  -1   8 832.150 24.0445   1
   2   1   8 1056.71 29.1220   1
  -2  -1   8 685.894 26.9492   1
   2  -1  -8 696.883 39.3156   1
  -2  -1  -8 1249.33 32.4074   1
   2  -1  -9-1.43303 20.8939   1
  -2   1  -9-10.7483 11.4305   2
  -2   1   9-5.45296 11.6328   1
  -2  -1  -9 30.7943 16.9548   1
  -2  -1  -9 21.8978 7.83321   2
  -2  -1   9 6.18401 11.8954   1
   2   1  -9 7.90179 17.7642   1
   2  -1  -9-7.42302 10.2949   2
   2  -1  -9 1.93594 8.05864   4
   2   1   9-3.31327 11.4869   1
  -2   1  -9 13.1566 15.9197   4
   2   1 -10 1725.36 46.4143   1
  -2  -1 -10 2237.54 31.7787   2
   2   1  10 2616.93 46.9597   1
   2  -1 -10 1770.09 33.0793   4
  -2  -1  10 2030.68 49.5638   1
  -2   1  10 2179.68 50.1332   1
   2  -1 -10 1627.89 53.9623   1
  -2   1  11 1524.26 45.7073   1
   2   1  11 1792.79 43.3875   1
   2  -1 -11 1352.22 34.1491   2
   2   1 -11 1287.69 42.5511   1
  -2  -1  11 1595.07 48.5057   1
   2  -1 -11 1215.63 49.8267   1
  -2  -1 -11 1605.09 32.0392   2
  -2  -1  12 19.7824 21.2930   1
  -2   1 -12-19.4367 14.8040   2
   2  -1 -12-8.60097 32.2985   1
  -2  -1 -12-3.77331 15.1282   4
  -2  -1 -12 12.3186 10.5281   2
  -2  -1 -13 323.002 19.3097   2
  -2   1  13 367.753 32.5979   1
  -2  -1 -13 361.357 27.5979   4
  -2  -1  14 1368.19 72.0947   1
  -2  -1 -14 1167.33 49.6274   4
  -2  -1 -15 909.081 63.9259   4
  -2   1  15 715.546 67.7355   1
   2   1 -16-8.06229 68.2510   2
  -2   1 -16 58.1016 33.3772   2
  -2   1  16 12.8286 76.6312   1
  -2  -1 -16 0.61789 48.1774   2
   2   1 -17 192.378 415.659   2
  -2   1  17 276.006 378.961   1
   3   1   0-8.51546 8.33167   2
  -3  -1   0 12.0353 8.97089   1
   3   1   0-2.99227 13.0938   1
   3  -1   0 2.68918 7.96050   1
  -3   1   0 2.40035 5.96917   1
   3   1  -1 4015.46 55.7683   1
  -3  -1   1 4331.85 33.4190   2
  -3   1  -1 3841.30 25.2562   2
  -3   1  -1 4024.83 36.9552   3
  -3  -1  -1 3598.74 26.0283   2
   3   1   1 4157.30 51.2403   1
  -3   1   1 4393.44 38.3830   1
   3   1  -1 4153.72 37.9136   2
   3   1   1 4664.50 39.4438   2
   3  -1  -1 3124.05 40.7270   1
  -3  -1   1 4783.70 37.8412   1
  -3  -1  -1 4844.09 38.0907   1
   3  -1   1 3570.16 32.3515   1
  -3   1   2 1403.24 26.0848   1
   3  -1   2 1170.50 15.6133   1
  -3  -1  -2 1268.19 15.2609   2
   3   1  -2 1373.71 36.1858   1
  -3   1  -2 1068.02 11.4332   2
  -3  -1   2 2150.32 31.4439   2
  -3  -1  -2 1916.91 30.5608   1
  -3  -1   2 2165.79 33.1687   1
   3  -1  -2 1175.45 32.1043   1
   3   1   2 1369.17 29.1070   1
  -3   1  -2 1235.14 22.3386   3
   3   1  -2 1290.26 22.7543   2
   3   1  -2 1492.54 10.2406   3
  -3   1  -3 3280.53 47.6655   4
   3   1   3 3575.93 46.8252   1
  -3   1   3 3128.10 42.4145   1
   3   1  -3 2732.59 33.7544   2
   3  -1  -3 3162.06 35.7782   2
   3  -1   3 3124.26 21.6287   1
  -3  -1  -3 3681.20 41.4552   1
   3  -1  -3 2140.96 41.0785   1
   3   1  -3 3408.59 17.4581   3
  -3  -1  -3 3066.96 24.0842   2
  -3   1  -3 2957.56 37.2326   3
  -3   1  -4 9.19968 5.03560   2
  -3   1  -4-1.55666 8.30906   3
  -3  -1  -4 1.80506 7.01093   1
  -3  -1   4-0.37821 9.27069   1
  -3   1  -4 0.35556 2.49147   2
  -3  -1  -4 5.53242 4.55292   2
   3   1  -4-10.3369 18.7102   1
   3  -1  -4-1.93802 17.0323   1
   3  -1  -4 5.50077 8.84402   2
   3   1  -4 0.44138 8.80500   2
  -3  -1   4 6.07920 10.1401   2
   3   1   4 7.29827 10.8841   1
   3  -1   4 0.30323 3.61511   1
  -3   1  -4-10.6271 12.5719   4
  -3   1   4 0.99779 9.91145   1
   3  -1  -5 633.127 32.1786   1
   3   1   5 831.334 21.6996   1
  -3  -1  -5 730.038 12.4846   2
  -3   1  -5 640.995 20.0655   3
  -3   1   5 736.450 25.1674   1
  -3  -1  -5 695.844 18.0292   2
   3  -1   5 727.892 12.3539   1
   3   1  -5 739.530 19.9088   2
  -3   1  -5 863.100 31.5685   4
  -3   1  -5 454.648 6.39594   2
   3   1  -5 675.172 35.8246   1
  -3   1  -6 1477.40 30.8405   3
   3  -1   6 1712.67 22.7805   1
  -3   1   6 1482.90 35.8012   1
  -3  -1  -6 1790.93 21.1632   2
   3   1  -6 1444.23 49.2226   1
  -3  -1   6 1586.77 35.7362   1
   3   1   6 2190.72 38.1434   1
   3  -1  -6 1413.45 46.7944   1
  -3  -1  -6 2191.15 36.8287   1
  -3   1  -6 1708.38 45.4675   4
  -3  -1  -7 1882.95 23.3243   2
   3   1   7 1833.12 33.7711   1
  -3   1  -7 1741.83 48.6758   4
   3   1  -7 1295.12 47.5147   1
  -3   1   7 1558.34 38.8528   1
  -3  -1  -7 1872.75 29.6845   1
  -3  -1   7 1381.15 36.2047   1
   3  -1  -7 1519.13 54.4615   1
   3  -1  -8 30.3065 22.7172   1
   3  -1  -8 9.87947 11.0778   2
   3   1  -8 20.8445 11.5832   2
  -3  -1  -8 22.5177 6.43112   2
  -3   1  -8 17.0479 5.60646   2
   3   1  -8 13.5322 19.7070   1
  -3   1   8 18.8926 13.2956   1
   3   1   8 43.7450 10.5468   1
   3  -1  -8 7.99903 7.24215   4
  -3   1  -8 54.1957 17.2163   4
  -3  -1   8 12.8943 12.0234   1
  -3   1  -8 31.0172 10.4370   2
   3   1  -9 520.599 32.9648   1
   3   1   9 901.961 29.3034   1
  -3  -1  -9 773.697 18.7052   2
  -3   1   9 636.015 28.6683   1
   3  -1  -9 640.099 39.0998   1
  -3  -1   9 544.422 24.4872   1
  -3   1  -9 454.515 30.0964   4
  -3  -1  10 15.5529 12.9826   1
   3   1 -10 28.5445 13.2265   2
   3  -1 -10-2.23328 14.3846   2
  -3  -1 -10 13.8687 7.89991   2
  -3   1 -10 46.4109 12.2207   2
   3   1 -10 67.9542 22.1969   1
  -3   1  10 11.8857 14.2114   1
  -3   1 -10 30.6564 17.9744   4
   3  -1 -10-1.36130 21.0088   1
   3   1  10 18.2744 12.5225   1
   3   1 -11 361.050 29.1710   1
  -3  -1 -11 522.648 17.6332   2
  -3  -1  11 440.095 29.3231   1
  -3   1  11 448.547 27.1899   1
  -3   1 -11 362.712 30.4600   4
   3   1  11 594.283 26.6229   1
   3  -1 -11 398.417 34.8297   1
  -3  -1  12 28.2828 18.4412   1
  -3   1 -12 3.89025 17.8129   4
   3  -1 -12-0.04137 19.3394   2
  -3   1 -12-0.93616 12.6721   2
   3   1 -12 59.1442 18.4198   2
  -3   1  12 22.6785 18.5021   1
   3  -1 -12 54.2598 28.4670   1
  -3  -1 -12 33.3774 11.2168   2
   3   1 -12 27.9882 20.0106   1
  -3  -1 -13 224.188 24.7530   4
  -3  -1  13 225.582 29.9217   1
  -3   1  13 149.138 25.7230   1
  -3  -1  14 14.6065 28.2819   1
   3  -1 -14 12.6437 26.5598   1
   3   1 -14 76.9267 31.1343   2
  -3  -1 -14 24.2416 24.5355   4
  -3   1 -14 8.15776 16.6116   2
  -3   1  14-6.12591 28.3422   1
  -3  -1 -14-24.7072 16.3255   2
  -3  -1 -15-18.4873 38.6280   4
  -3  -1 -15 47.6273 23.5148   2
   3   1 -15 61.8901 44.9356   2
  -3   1 -15-26.3870 23.4826   2
  -3   1  15-14.5586 41.3470   1
  -3  -1  15-3.49925 49.9327   1
  -3   1 -16 129.726 33.5364   2
  -3   1  16 393.828 91.8952   1
  -3  -1  16 691.909 151.828   1
  -3  -1 -16 957.779 111.688   4
  -4  -1   0 13269.4 55.7773   2
  -4   1   0 14236.1 55.8698   2
  -4   1   0 14293.1 48.1008   1
   4  -1   0 13041.6 82.6075   1
   4   1   0 13636.4 99.4568   1
   4   1  -1 4926.37 68.5260   1
  -4  -1  -1 4587.98 32.0698   2
  -4   1  -1 4462.39 41.6103   3
  -4   1  -1 4462.23 28.9144   2
   4  -1  -1 4465.68 56.1606   1
   4  -1   1 4167.62 40.3871   1
   4   1  -1 5367.51 45.0079   2
   4   1   1 5026.52 59.4569   1
  -4   1   1 4732.31 39.1376   1
  -4  -1  -1 5473.79 40.5462   1
  -4  -1  -2 1201.05 15.3315   2
  -4   1   2 1401.19 26.9314   1
   4   1  -2 1365.76 25.0022   2
  -4  -1  -2 1695.81 28.6165   1
  -4   1  -2 1052.21 12.2662   2
  -4  -1   2 1935.65 33.0837   1
   4  -1  -2 776.332 23.4849   1
   4  -1   2 1158.98 16.2762   1
  -4   1  -2 1350.39 30.1912   4
   4   1   2 1296.16 29.9159   1
  -4   1  -2 1191.77 24.3430   3
  -4   1  -3 1453.55 33.5836   4
   4   1   3 1499.08 30.7601   1
  -4   1  -3 1206.13 11.9561   2
  -4  -1  -3 1368.14 15.8253   2
   4  -1   3 1331.84 13.2260   1
  -4   1   3 1578.12 32.3679   1
   4   1  -3 1415.87 26.4470   2
  -4  -1  -3 1421.67 22.7441   2
  -4  -1  -3 1673.72 27.7598   1
   4  -1  -3 1244.93 39.1136   1
  -4   1  -3 1321.76 26.1289   3
   4   1   4 12324.8 82.9304   1
  -4  -1  -4 11024.0 61.4872   2
  -4  -1   4 12760.4 85.8077   1
  -4  -1  -4 12388.2 69.7175   1
  -4   1   4 11296.0 90.4991   1
   4  -1  -4 9861.46 112.481   1
  -4   1  -4 11508.7 83.3425   3
  -4   1  -4 11447.1 97.1059   4
  -4  -1  -4 11887.8 47.4791   2
   4   1   5 312.144 18.3477   1
  -4   1  -5 172.280 17.8017   4
  -4  -1  -5 193.460 7.52883   2
  -4   1  -5 123.682 3.32614   2
   4   1  -5 175.467 13.6877   2
  -4  -1   5 306.667 16.3015   2
  -4   1   5 209.818 17.8296   1
  -4  -1  -5 220.081 12.2516   2
  -4  -1   5 222.923 16.1563   1
  -4  -1  -5 267.635 13.2237   1
  -4   1  -5 196.090 13.3604   3
  -4  -1   6 4124.51 51.3742   2
   4   1   6 4042.35 47.4369   1
  -4   1   6 3811.38 62.3127   1
  -4  -1  -6 3505.81 26.4982   2
  -4   1  -6 3343.26 60.7997   4
  -4   1  -6 3016.60 47.6445   3
  -4  -1   6 3177.47 51.5594   1
   4  -1  -6 3028.59 73.1244   1
   4   1  -6 3507.54 82.7320   1
  -4  -1  -7 0.70635 5.62214   2
   4   1  -7 5.56645 24.6209   1
   4  -1  -7 54.9748 15.2927   2
  -4   1  -7-9.65935 7.03006   2
  -4   1  -7 5.02393 3.67581   2
  -4   1  -7 27.8850 16.9448   4
   4   1   7 4.14970 10.7116   1
  -4   1   7 20.0679 15.2763   1
  -4  -1   7 19.2296 12.3550   1
   4  -1  -7 26.2251 23.0373   1
   4   1  -8 1194.26 51.3162   1
  -4   1  -8 1244.23 44.6662   4
  -4   1   8 1268.52 39.8519   1
   4   1   8 1642.41 33.9728   1
  -4  -1   8 1181.58 36.5305   1
   4  -1  -8 1248.09 53.1810   1
  -4  -1  -8 1548.57 21.9215   2
   4   1   9 12.2767 10.4048   1
  -4  -1   9 25.9126 14.7093   1
   4  -1  -9 10.8234 24.2955   1
  -4   1  -9 11.7140 7.12514   2
  -4  -1  -9-2.44817 6.54265   2
  -4   1  -9 11.3908 9.76977   2
   4   1  -9 9.81123 12.1654   2
   4   1  -9 39.9254 26.1454   1
  -4   1   9 5.81448 15.3118   1
   4  -1  -9 21.7270 15.6986   2
  -4   1  -9 16.7000 16.6269   4
  -4   1 -10 1756.04 55.0690   4
  -4  -1  10 1948.86 52.3487   1
   4  -1 -10 1792.94 60.3856   1
  -4  -1  11 23.6419 17.2924   1
   4   1 -11 17.0764 16.5101   2
   4  -1 -11 7.23857 24.6720   1
  -4   1 -11 20.8909 19.6399   4
  -4  -1 -11-7.14558 8.69424   2
  -4   1 -11-16.1257 11.9270   2
  -4   1  11 18.2147 17.6556   1
   4   1 -11 63.3366 22.9301   1
  -4   1 -12 22.1615 19.6552   4
   4  -1 -12 44.2222 28.7478   1
  -4  -1 -12 14.8105 8.92754   2
  -4  -1  12 7.56653 19.4657   1
  -4   1 -12 19.4484 11.8494   2
   4   1 -12 14.8606 23.0660   1
  -4   1  12 3.58099 17.6211   1
  -4  -1 -13 353.116 30.0858   4
  -4  -1 -13 319.467 18.2796   2
  -4   1  13 272.130 30.3660   1
  -4  -1  13 318.636 34.7295   1
   4  -1 -13 375.468 44.4497   1
  -4   1 -13 277.924 33.2522   4
  -4  -1 -14 1678.02 41.5510   2
  -4   1  14 1888.32 75.5193   1
  -4  -1  14 1940.12 87.8361   1
  -4   1 -15 104.368 22.5373   2
  -4   1  15 384.431 54.9245   1
  -4  -1  16-11.7610 137.923   1
  -4  -1 -16-72.7988 46.2749   2
  -4   1 -16-42.8424 26.8841   2
  -4   1  16 49.4254 86.0129   1
   5  -1   0 7.33508 11.5656   1
  -5   1   0 2.95623 5.64834   3
  -5  -1   0 13.6200 8.34888   2
  -5   1   0-3.60729 6.79933   2
   5   1   0-9.39885 13.4647   1
  -5  -1   0-1.21066 9.23335   1
  -5   1  -1 5.97422 7.42597   3
  -5   1   1 4.92787 6.49375   1
  -5  -1  -1 15.1586 5.77574   2
  -5  -1  -1 24.3437 8.38183   1
  -5   1   1 7.31419 6.50384   2
   5   1   1 19.7571 12.0161   1
  -5   1  -1 7.36249 9.96612   4
  -5   1   1 1.63961 5.45596   3
   5  -1  -1 7.19462 9.57971   1
   5  -1   2 5678.38 45.1804   1
  -5   1  -2 6030.30 55.1420   3
  -5   1   2 6485.37 54.9076   1
  -5  -1  -2 6069.06 35.8282   2
  -5  -1  -2 6724.65 50.5510   1
   5  -1  -2 6976.47 86.5494   1
  -5   1  -2 6439.11 64.5730   4
   5   1   2 6871.94 68.9584   1
   5  -1  -3 66.1939 18.5157   1
  -5  -1  -3 83.9962 9.16903   2
  -5   1   3 101.409 11.2249   1
  -5  -1  -3 84.6661 8.47450   1
  -5  -1  -3 113.320 6.14005   2
   5  -1   3 96.7080 5.49676   1
  -5  -1  -4-11.1211 8.90872   2
  -5  -1  -4 9.34884 8.13680   1
  -5   1  -4 1.10168 8.17623   3
  -5  -1   4 2.03961 9.45716   2
  -5  -1  -4 8.27489 4.54987   2
   5   1  -4-18.3534 23.6621   1
   5  -1  -4-3.60741 12.7975   2
   5   1  -4 12.0677 10.8812   2
  -5   1  -4-8.53640 11.6247   4
  -5   1  -4-0.63739 3.16750   2
  -5  -1   4-18.7232 11.8748   1
   5   1   4 0.06650 9.78303   1
   5  -1  -4-12.5605 14.1288   1
  -5   1   4-18.9351 11.4705   1
  -5   1  -5 386.676 6.75704   2
   5   1  -5 739.052 48.0134   1
  -5   1  -5 562.038 26.3959   4
  -5  -1  -5 668.124 11.9753   2
  -5   1   5 724.563 27.5884   1
   5   1  -5 720.357 22.7331   2
  -5  -1   5 725.102 28.0063   1
  -5   1  -5 424.608 4.90586   2
  -5   1  -5 416.924 16.4102   3
   5  -1  -5 560.412 32.3520   1
   5   1   5 850.719 26.8008   1
   5   1  -6 1012.62 52.8180   1
  -5   1  -6 809.453 25.3548   3
  -5  -1   6 864.653 29.0801   1
   5   1   6 1348.61 33.9737   1
  -5  -1  -6 1011.52 15.5923   2
   5  -1  -6 886.779 42.6242   1
  -5   1  -6 839.499 33.1394   4
  -5   1   6 976.636 33.5574   1
  -5   1  -7 365.470 26.3455   4
  -5   1   7 478.633 26.0230   2
  -5   1   7 466.114 26.2841   1
  -5  -1  -7 501.692 11.4341   2
  -5   1  -7 386.734 8.73263   2
   5   1  -7 462.421 41.9879   1
   5  -1  -7 450.951 34.9072   1
  -5  -1   7 352.198 22.0333   1
  -5   1   8 208.261 20.7327   1
  -5  -1  -8 323.793 10.7835   2
  -5  -1   8 219.348 19.2491   1
   5   1  -8 302.575 35.6811   1
   5  -1  -8 243.117 31.4901   1
  -5   1  -8 205.630 23.1029   4
  -5  -1   9 1280.27 39.6336   1
  -5   1   9 1406.25 43.7129   1
   5  -1  -9 1331.65 55.9794   1
  -5   1  -9 1392.36 48.9220   4
   5   1  -9 1255.42 56.6772   1
   5  -1 -10 239.534 30.2504   1
  -5   1  10 263.020 23.8093   1
   5   1 -10 286.999 37.5562   1
  -5   1 -10 224.424 26.3933   4
  -5   1 -11 45.4741 20.3291   4
  -5  -1 -11 94.6119 9.56749   2
   5  -1 -11 74.9146 24.8821   1
  -5   1  11 104.391 19.3104   1
  -5  -1  11 58.0522 19.4684   1
  -5   1  12 701.430 36.3241   1
  -5   1 -12 619.008 38.6546   4
  -5  -1  12 797.373 43.1767   1
   5  -1 -12 709.437 50.6882   1
   5   1 -12 644.236 43.2016   1
  -5   1 -13 525.918 43.5870   4
  -5  -1  13 901.592 50.7503   1
  -5  -1 -13 1042.84 30.1333   2
  -5   1  13 782.786 44.6020   1
   5  -1 -13 694.268 53.2210   1
  -5  -1 -13 1138.23 51.0850   4
   5   1 -13 568.523 39.6682   1
  -5   1  14 399.875 43.1454   1
  -5  -1 -14 371.780 22.9566   2
  -5  -1  14 402.400 49.4374   1
  -5   1 -14 437.088 47.6121   4
  -5   1  15 386.396 54.3323   1
   5  -1 -15 199.959 32.5217   1
  -5  -1 -16 2836.55 245.635   4
   6  -1   0 1161.23 30.9645   1
  -6   1   0 1159.46 22.7002   3
  -6  -1  -1 122.882 8.37539   2
  -6   1  -1 66.4462 8.88350   3
  -6   1   1 66.3326 7.65687   3
   6   1  -1 82.6099 18.7213   1
  -6   1   1 63.5626 6.56100   1
   6  -1   1 79.4826 13.8517   1
   6  -1  -1 88.7739 18.3220   1
  -6  -1   1 78.6044 10.6865   1
  -6   1   2 483.977 14.0517   3
  -6  -1  -2 566.987 12.1207   2
  -6   1  -2 489.438 10.5580   2
  -6   1   2 556.200 17.4636   1
  -6  -1  -2 606.721 16.9941   1
   6  -1   2 586.096 19.0031   1
  -6  -1   2 389.465 14.1953   1
   6  -1  -2 653.751 32.4948   1
   6   1  -2 647.019 37.0001   1
  -6   1  -2 431.417 16.4284   3
  -6   1  -2 525.595 20.7692   4
   6   1  -3 471.721 35.5345   1
  -6   1  -3 283.195 17.7486   4
  -6  -1   3 394.416 15.3290   2
  -6   1   3 340.797 17.0382   1
  -6   1  -3 310.308 16.3751   3
  -6  -1   3 327.930 17.8242   1
   6  -1  -3 260.465 20.2988   1
  -6  -1  -3 361.889 9.87936   2
  -6  -1  -3 349.278 12.8411   1
   6   1   3 408.842 20.1789   1
  -6   1  -4 683.481 26.9696   4
  -6   1  -4 627.557 20.6837   3
  -6  -1   4 826.500 21.3175   2
  -6  -1   4 898.736 30.0004   1
  -6  -1  -4 751.095 12.7972   2
   6   1   4 938.146 27.8473   1
   6  -1  -4 674.821 33.5031   1
   6   1  -4 965.299 49.6067   1
  -6   1   4 794.468 25.8706   1
  -6   1  -5 1872.67 45.1408   4
  -6   1   5 2409.19 46.5393   1
   6   1  -5 2694.70 79.7334   1
   6   1   5 2521.37 41.7514   1
  -6   1  -5 1832.12 34.6786   3
  -6  -1   5 2098.95 44.0496   1
  -6  -1  -5 2258.98 21.5631   2
   6  -1  -5 2120.23 60.8060   1
  -6   1  -6 27.4264 15.3616   4
  -6   1  -6 26.1977 10.7475   3
   6   1   6 16.8133 10.0087   1
   6  -1  -6 22.6353 20.2704   1
  -6   1  -6 9.43929 2.73435   2
  -6  -1   6 39.9477 11.6588   2
   6   1  -6 33.2900 27.0413   1
  -6  -1   6 38.6360 13.8604   1
  -6  -1  -6 35.1581 5.14652   2
  -6   1   6 25.5611 15.5437   2
  -6   1   6 42.4722 13.3369   1
  -6   1   7 644.380 28.8334   1
  -6   1  -7 488.200 28.7835   4
   6  -1  -7 562.776 39.3812   1
  -6  -1   7 600.436 27.4713   1
  -6  -1  -7 699.245 13.2630   2
   6   1  -7 672.143 46.8660   1
  -6  -1  -8 580.471 12.8865   2
  -6  -1   8 447.672 25.2281   1
   6  -1  -8 482.770 38.0049   1
   6   1  -8 514.033 43.2788   1
  -6   1  -8 433.420 29.8721   4
  -6   1   8 490.875 27.8948   1
  -6   1  -9 882.318 40.0305   4
  -6   1   9 949.912 36.1467   1
   6   1  -9 915.126 51.9943   1
  -6  -1   9 808.095 32.8713   1
   6  -1  -9 929.010 46.4066   1
  -6  -1 -10 133.067 9.35273   2
  -6  -1  10 100.678 18.2331   1
   6   1 -10 80.4512 29.9209   1
  -6   1  10 119.936 17.1075   1
  -6   1 -10 70.8897 21.9843   4
   6   1 -11 263.432 37.2692   1
  -6   1  11 238.944 23.3878   1
  -6  -1  11 262.139 25.0924   1
  -6   1 -11 246.454 29.3999   4
   6  -1 -11 294.020 35.3992   1
  -6  -1  12 48.0210 22.6963   1
   6   1 -12 37.3302 27.6325   1
   6  -1 -12 14.0064 28.4536   1
  -6   1 -12-37.8044 27.0601   4
  -6  -1 -12 44.7368 10.9462   2
  -6   1  12 52.4921 19.7521   1
  -6   1  13 41.2415 24.5439   1
  -6   1 -13 26.6955 11.6884   2
   6   1 -13 43.7318 25.5412   1
  -6  -1  13 80.3995 32.2391   1
   6  -1 -13 60.8728 30.8142   1
  -6   1 -13 30.6531 27.6985   4
  -6  -1 -13 73.2337 27.4121   4
  -6  -1 -14 536.576 27.0147   2
  -6   1  14 528.147 48.2383   1
  -6  -1  14 446.439 52.7601   1
  -6  -1  15 70.5870 76.0143   1
   6  -1 -15 25.7182 25.2469   1
  -6  -1 -15 9.96583 24.4879   2
  -6   1 -15 8.87819 12.9479   2
  -6  -1 -15 78.0956 62.0888   4
  -6   1  15 28.9580 47.9732   1
   7  -1   0 26.4815 17.4669   1
  -7   1   0-4.06509 7.16852   3
  -7   1   0 17.5072 7.94461   2
  -7   1   0 15.0671 9.32581   4
   7   1   0 44.0687 17.5311   1
   7   1   1 936.059 35.1492   1
   7   1  -1 992.721 42.8538   1
  -7   1  -1 877.727 25.1738   4
  -7   1   1 769.391 19.3913   3
  -7  -1  -1 1067.64 24.4923   1
  -7   1  -1 795.300 21.7648   3
  -7   1   1 596.361 9.24656   1
   7  -1   1 1189.93 37.9842   1
   7  -1  -1 1221.23 43.5088   1
  -7  -1   1 885.033 23.6729   1
  -7   1  -2 1761.70 34.3947   3
  -7  -1   2 1800.73 28.2412   2
  -7  -1  -2 1741.63 21.0872   2
  -7   1   2 1802.12 27.9914   3
  -7   1  -2 1631.15 35.3397   4
  -7   1  -2 1701.81 20.4617   2
   7   1   2 2136.13 46.3525   1
  -7  -1  -2 1954.45 25.3224   1
  -7  -1   2 1510.62 30.6158   1
   7  -1  -2 1985.52 47.6310   1
   7   1  -2 2091.27 61.5220   1
  -7   1   2 1625.31 26.0521   1
  -7   1  -3 2024.99 36.3754   3
  -7  -1   3 2454.17 34.0323   2
  -7  -1  -3 2263.06 23.3797   2
  -7   1   3 1939.63 26.7730   3
  -7   1   3 2423.11 37.3296   1
  -7  -1   3 2398.76 44.9387   1
   7  -1  -3 2536.78 58.9155   1
  -7   1  -3 2011.32 41.3368   4
   7   1  -3 2972.93 74.7484   1
   7   1   3 2597.88 47.4328   1
  -7  -1   4 924.790 22.4015   2
  -7  -1  -4 783.798 13.3780   2
  -7   1  -4 686.143 10.5113   2
  -7   1  -4 639.004 21.2935   3
  -7   1   4 784.253 23.9913   1
  -7  -1   4 802.359 27.3258   1
   7  -1  -4 875.604 41.3503   1
  -7   1  -4 699.027 27.7937   4
   7   1  -4 966.519 47.6515   1
   7   1   4 917.003 28.6872   1
   7   1   5 682.793 27.8405   1
  -7   1  -5 366.794 18.0592   3
  -7   1   5 486.918 24.3474   2
  -7   1   5 525.224 24.1436   1
  -7  -1   5 455.456 24.2448   1
  -7  -1  -5 517.593 10.9965   2
   7  -1  -5 536.206 34.8001   1
   7   1  -5 484.333 40.9417   1
  -7   1  -5 346.724 21.3514   4
  -7   1  -6 1661.49 39.5515   3
  -7   1   6 1749.84 41.7728   2
  -7   1  -6 1530.42 45.0786   4
   7  -1  -6 1781.21 60.4496   1
  -7   1   6 2013.95 45.5498   1
  -7  -1  -6 1738.63 19.3881   2
  -7  -1   6 1562.79 40.8290   1
   7   1  -6 2083.69 74.4180   1
  -7  -1   7 46.9981 13.2472   1
  -7   1   7 63.5811 16.3842   1
   7  -1  -7 37.6332 24.1711   1
  -7   1   7 76.9451 19.0811   2
   7   1  -7 106.596 31.3132   1
  -7   1  -7 48.2880 17.7863   4
  -7  -1  -8 2943.80 25.6527   2
  -7  -1   8 2641.84 55.7776   1
  -7   1  -8 2608.44 63.1987   4
  -7   1   8 2945.37 60.7765   1
   7  -1  -8 2694.83 78.0095   1
   7   1  -8 2935.27 87.1632   1
  -7  -1  -9 206.431 9.27092   2
  -7   1   9 143.183 20.2436   1
  -7   1  -9 134.912 22.5443   4
  -7  -1   9 127.091 18.4456   1
   7  -1  -9 167.837 28.8293   1
   7   1  -9 156.860 32.9447   1
  -7  -1  10 635.537 32.1110   1
   7   1 -10 588.750 47.5574   1
   7  -1 -10 619.112 42.9717   1
  -7   1 -10 719.618 40.9568   4
  -7   1  10 636.727 33.4154   1
  -7   1  11 10.5033 18.4264   1
  -7   1 -11 11.8216 22.8800   4
  -7   1 -11 29.6258 7.21632   2
   7  -1 -11-19.7591 30.3199   1
  -7  -1  11-1.09444 17.7807   1
  -7  -1 -11 12.3246 9.08628   2
   7   1 -11 49.4960 28.6486   1
  -7   1  12 1768.39 62.8885   1
  -7  -1  12 1579.42 60.4014   1
   7  -1 -12 1444.42 71.6253   1
   7   1 -12 1234.03 61.1591   1
  -7   1 -12 1460.21 63.3944   4
  -7  -1 -13-5.71269 27.9831   4
  -7  -1  13-13.2919 29.3522   1
   7  -1 -13-28.5873 35.3490   1
  -7  -1 -13-4.44658 12.2593   2
  -7   1  13 0.32659 26.0674   1
   7   1 -13-13.0301 26.1343   1
  -7   1 -13-13.9138 8.88795   2
  -7   1 -13-3.32857 30.2018   4
  -7   1  14 104.874 37.1625   1
  -7  -1 -14 111.784 45.0506   4
  -7  -1  14 60.8976 42.2973   1
  -7   1 -14 14.8263 8.78416   2
   7   1 -14 69.5390 26.0003   1
  -7   1 -14 148.097 43.2077   4
  -8  -1   0 1805.07 26.6168   2
   8  -1   0 1692.06 43.7996   1
  -8   1   0 1631.82 30.2765   3
   8   1   0 1843.99 52.3966   1
  -8   1   0 1601.09 30.7677   4
  -8   1  -1 173.867 12.1449   3
  -8  -1   1 204.233 11.5719   2
  -8  -1  -1 343.411 14.3704   2
  -8  -1  -1 266.781 13.7598   1
   8  -1  -1 282.906 25.1329   1
  -8  -1   1 244.384 16.6850   1
  -8   1   1 223.598 12.9197   3
   8   1  -1 212.786 26.1581   1
   8   1   1 268.524 23.6334   1
  -8   1  -1 229.979 16.0405   4
  -8   1  -2 1.37890 6.74356   2
  -8   1   2-4.17409 12.4137   2
  -8  -1   2-14.1428 8.80376   2
  -8  -1  -2-3.30732 5.65652   2
   8   1  -2 9.35371 22.1453   1
   8   1   2-24.9159 15.1242   1
   8  -1  -2 31.7413 19.3317   1
  -8  -1   2-0.53991 9.21991   1
  -8   1   2 2.00899 7.05712   1
  -8   1   2 0.04836 6.66649   3
  -8   1  -2-3.93239 7.35386   3
  -8   1  -2 1.83267 11.4059   4
  -8   1   3 64.5215 14.5018   2
   8  -1  -3 38.7196 21.2791   1
  -8  -1  -3 59.7827 6.75851   2
  -8   1   3 46.4400 7.53123   3
  -8   1   3 53.6750 9.33461   1
  -8  -1   3 15.2793 9.45208   2
   8   1  -3 45.0020 22.7837   1
  -8  -1   3 12.2840 7.77699   1
  -8   1  -3 43.7545 8.66392   3
   8   1   3 46.3237 14.6623   1
  -8   1  -3 48.4764 12.8924   4
  -8   1  -4 395.081 17.8760   3
  -8   1   4 544.829 18.0747   3
  -8  -1   4 525.116 18.1951   2
  -8  -1  -4 507.049 11.6102   2
  -8   1  -4 491.732 10.5769   2
  -8   1  -4 383.924 23.1577   4
  -8  -1   4 461.476 22.9863   1
  -8   1   4 549.758 20.7412   1
   8  -1  -4 620.969 37.0606   1
   8   1  -4 615.794 42.1317   1
   8   1   4 553.133 25.8463   1
  -8  -1  -5 182.585 7.76604   2
  -8   1   5 172.956 10.4405   3
   8  -1  -5 178.577 26.5090   1
  -8   1   5 209.909 17.9627   1
  -8   1  -5 167.006 19.7389   4
  -8  -1   5 157.096 16.0028   1
  -8  -1   5 200.564 14.1878   2
  -8   1  -5 151.202 14.5149   3
   8   1  -5 186.405 30.8723   1
  -8   1  -6 354.731 26.3999   4
  -8   1   6 445.646 25.1120   1
  -8  -1   6 359.802 23.4502   1
  -8  -1  -6 462.657 11.3927   2
   8  -1  -6 491.833 39.5768   1
   8   1  -6 452.797 43.1264   1
  -8   1   7 418.121 24.0010   2
  -8   1  -7 335.989 27.7183   4
  -8   1   7 431.140 24.6481   1
  -8  -1   7 380.709 24.5001   1
   8  -1  -7 472.078 39.8819   1
   8   1  -7 543.164 46.5120   1
  -8  -1  -7 448.183 10.6402   2
  -8   1   8-19.8877 16.5903   1
   8  -1  -8 12.8045 22.2913   1
  -8  -1  -8 8.02052 4.98420   2
   8   1  -8-23.7845 26.9712   1
  -8   1  -8-3.52757 18.8088   4
  -8  -1   8 10.6741 15.0008   1
  -8  -1  -9 49.6020 6.20483   2
  -8   1   9 51.9397 18.1215   1
   8  -1  -9 46.7248 23.6496   1
   8   1  -9 73.2353 30.9988   1
  -8  -1   9 38.0410 13.4906   1
  -8   1  -9 52.5417 22.3754   4
  -8  -1 -10 296.795 11.5252   2
  -8   1  10 270.330 25.0229   1
  -8  -1  10 190.127 22.3469   1
   8  -1 -10 192.562 34.5734   1
   8   1 -10 244.063 37.7918   1
  -8   1 -10 104.939 25.5810   4
  -8   1  11 1179.65 48.8739   1
  -8  -1  11 1302.76 50.8724   1
   8  -1 -11 1327.06 73.0135   1
  -8   1 -11 1268.05 57.0927   4
   8  -1 -12 39.6201 37.0261   1
  -8   1 -12 48.2831 30.1119   4
  -8  -1  12 80.3033 27.1039   1
   8   1 -12-5.61405 27.8571   1
  -8   1  12 11.5706 22.4876   1
  -8   1  13 21.7470 25.9556   1
  -8  -1 -13 28.7613 30.6706   4
  -8   1 -13 24.6975 31.4098   4
   8  -1 -13 17.5380 36.0951   1
  -8  -1  13 19.3359 33.7905   1
  -8  -1 -13 14.5990 13.3870   2
   8   1 -13 27.7590 22.9983   1
   8   1 -14 18.9192 22.0738   1
  -9   1   0 11.2171 8.64724   3
  -9   1   0 8.95778 13.3676   2
  -9  -1   0-5.66624 8.14927   2
   9   1   0-16.0659 18.8721   1
  -9  -1   0 16.0017 10.3020   1
  -9   1  -1 49.6291 9.70162   3
  -9   1   1 29.7578 8.58037   3
  -9   1  -1 25.1368 12.4602   2
  -9   1   1 41.6403 14.1237   2
   9   1  -1 37.8526 22.7992   1
   9   1   1 36.4183 17.3342   1
  -9  -1  -1 62.6485 10.0496   2
  -9   1  -2 1123.06 27.8516   3
  -9   1   2 1591.81 30.5965   3
  -9  -1   2 1426.41 28.0608   2
  -9  -1  -2 1411.92 21.5036   2
  -9   1   2 1838.67 39.3900   2
  -9   1  -2 1295.30 33.4614   4
   9  -1  -2 1996.71 61.6958   1
  -9  -1   2 1428.49 32.2937   1
   9   1  -2 1800.99 63.9585   1
   9   1   2 1510.23 47.4204   1
   9   1   3 3.73094 14.1007   1
  -9   1  -3 8.38909 6.94627   3
   9  -1  -3 26.2979 22.6863   1
  -9   1   3 41.2754 16.0289   2
  -9  -1   3 30.1797 9.89263   2
  -9  -1   3 20.0266 11.3017   1
   9   1  -3 10.3035 24.2205   1
  -9   1   3 18.6767 7.78296   3
  -9   1   3 31.8311 8.84154   1
  -9  -1  -3 19.5638 6.25462   2
  -9   1  -3 25.6790 13.5594   4
   9  -1  -4 47.6467 25.9664   1
  -9   1   4 20.3149 7.86436   3
  -9  -1   4 7.15381 8.63683   1
  -9   1  -4 7.32446 9.18209   3
  -9   1  -4 13.5631 7.28744   2
  -9   1   4 29.0466 14.4247   2
  -9  -1   4-4.07462 10.9211   2
  -9  -1  -4 23.2238 5.28429   2
  -9   1  -4 14.5460 6.13317   2
   9   1  -4 37.4233 26.3639   1
  -9   1   4 22.8631 8.45853   1
  -9   1  -4 6.60192 13.8610   4
  -9   1   5 168.767 15.1996   1
  -9  -1  -5 155.961 7.62152   2
  -9  -1   5 144.114 17.1339   1
   9   1  -5 202.473 36.0593   1
  -9   1  -5 117.309 18.7864   4
  -9   1   6 959.789 33.8140   2
  -9  -1  -6 798.050 14.2216   2
  -9   1  -6 716.807 36.6908   4
  -9   1  -6 683.511 9.94021   2
  -9   1   6 929.408 32.1040   1
  -9  -1   6 711.813 29.9191   1
   9  -1  -6 1187.95 58.3826   1
   9   1  -6 995.809 58.7128   1
  -9  -1  -7 226.465 8.65458   2
  -9   1   7 320.572 23.4140   1
  -9  -1   7 218.720 20.8428   1
   9  -1  -7 362.138 38.0935   1
   9   1  -7 412.764 45.0256   1
  -9   1   8 62.4541 17.5876   1
   9  -1  -8 55.9759 29.0704   1
  -9  -1  -8 44.5264 5.84337   2
   9   1  -8 48.1542 29.3478   1
  -9  -1   8 35.6717 15.6721   1
  -9   1  -8 72.1856 22.4409   4
  -9  -1  -9 830.906 16.1344   2
  -9   1   9 852.084 39.4705   1
  -9  -1   9 741.150 34.2814   1
   9  -1  -9 863.947 57.4094   1
   9   1  -9 680.536 52.1727   1
  -9   1  -9 580.269 39.2382   4
  -9   1 -10 21.2031 23.7383   4
   9   1 -10 31.8970 34.8084   1
  -9  -1 -10 36.6182 7.80603   2
  -9  -1  10 38.8918 18.4647   1
   9  -1 -10 37.0392 36.9973   1
   9   1 -11 84.4812 34.5433   1
  -9   1  11 79.4897 20.3401   1
   9  -1 -11 94.7630 40.2837   1
  -9  -1  11 65.1119 22.4463   1
  -9  -1 -11 133.019 11.9238   2
  -9   1 -11 143.668 30.0417   4
  -9  -1 -12 76.4346 12.9184   2
   9  -1 -12 89.4514 49.6188   1
  -9   1  12 75.8964 23.0593   1
   9   1 -12 62.3466 30.7247   1
  -9  -1  12 66.7916 27.5127   1
  -9   1 -12 63.5859 29.7732   4
  -9   1  13 184.564 27.9905   1
  -9   1 -13 182.695 36.0844   4
 -10  -1   0 2445.16 35.5103   2
  10   1   0 2544.02 72.1186   1
 -10  -1  -1 1851.87 28.1963   2
 -10   1   1 1960.90 39.7498   3
  10   1  -1 2004.17 69.3993   1
  10   1   1 1989.39 62.7173   1
 -10   1  -2 156.551 14.3806   3
 -10  -1  -2 215.944 10.5637   2
 -10   1   2 284.477 16.1711   3
 -10  -1   2 168.757 14.1278   1
  10   1   2 257.299 27.1598   1
 -10   1  -3 943.181 29.8375   3
 -10   1  -3 953.547 33.1050   4
 -10  -1   3 939.354 27.4187   1
 -10  -1  -4 371.851 11.0990   2
 -10  -1   4 315.785 18.3415   1
 -10   1  -4 311.771 23.9385   4
 -10   1  -5 443.307 28.7189   4
 -10  -1  -5 480.258 11.8740   2
 -10   1   5 508.571 20.9820   1
 -10  -1   5 298.613 16.1465   1
  10  -1  -5 870.856 55.4595   1
  10   1  -5 688.825 53.3763   1
 -10   1  -6 788.035 11.9255   2
 -10   1   6 1445.47 46.4090   2
 -10   1   6 1046.55 34.3731   1
 -10  -1   6 952.777 37.6248   1
 -10  -1  -6 949.622 15.9640   2
  10  -1  -6 1588.66 73.0747   1
  10   1  -6 1251.81 70.6964   1
 -10   1  -6 918.120 41.3628   4
 -10  -1  -7 151.225 8.25163   2
  10  -1  -7 107.770 33.1886   1
 -10   1   7 158.287 18.2253   1
 -10  -1   7 141.058 19.8962   1
  10   1  -7 206.947 37.8716   1
 -10   1  -7 157.390 25.5329   4
 -10   1   8 204.665 19.6088   1
 -10  -1  -8 251.844 10.8040   2
 -10  -1   8 182.736 20.8505   1
  10   1  -8 265.010 43.6307   1
 -10   1  -8 181.063 26.7770   4
  10  -1  -9-32.8854 46.7143   1
 -10  -1  -9 14.6529 6.57865   2
  10   1  -9 43.4647 36.8199   1
 -10   1  -9-5.09807 22.6638   4
 -10   1   9-5.54144 15.8248   1
 -10  -1   9 20.2339 17.7776   1
 -10  -1 -10 1445.53 25.4761   2
 -10   1  10 847.903 36.3465   1
 -10  -1  10 913.318 42.3904   1
  10  -1 -10 1654.78 100.552   1
  10   1 -10 1095.37 73.0820   1
 -10   1 -10 832.142 46.0000   4
 -10   1  11 28.8447 14.8634   1
 -10  -1 -11 34.7291 10.7810   2
  10  -1 -11 34.6474 57.1815   1
  10   1 -11 54.4867 39.4827   1
 -10   1 -11 16.0651 23.7089   4
 -10  -1  11 34.9218 20.0814   1
 -10   1  12 55.6460 16.0940   1
 -10   1 -12 34.9334 25.6737   4
 -11   1   0 2.98244 11.2510   2
 -11  -1   0-13.4257 11.7587   2
 -11  -1  -1 16.1252 8.67748   2
 -11   1  -1-0.67812 11.0770   3
 -11   1   1-0.38206 12.3081   2
 -11   1  -1 15.4323 10.5294   2
 -11  -1   1 1.95255 10.6040   2
  11   1  -1-2.86154 29.9929   1
 -11  -1  -2 133.401 9.81773   2
 -11   1  -2 169.964 17.5734   3
  11  -1  -3 29.8843 35.1228   1
 -11   1   3 22.8657 16.1676   2
 -11   1  -3 4.74475 7.21070   2
 -11  -1   3-0.41999 13.5681   2
 -11  -1  -3 9.54996 6.83043   2
  11   1  -3-23.3709 32.3370   1
  11  -1  -4 18.3659 35.1790   1
 -11   1   4 41.8974 18.7326   2
 -11   1  -4 4.04010 6.77828   2
 -11  -1   4 39.1351 16.2057   2
 -11  -1  -4 14.8835 6.23007   2
  11   1  -4-9.31116 35.4202   1
 -11  -1   4 17.8876 12.2055   1
 -11  -1  -5 241.484 10.0774   2
 -11  -1   5 192.186 18.0272   1
 -11  -1   6 18.1445 10.7339   1
  11  -1  -6 78.9220 43.5119   1
 -11   1   6 76.3433 24.8783   2
  11   1  -6 46.3514 39.1935   1
 -11  -1  -6 33.8366 6.66647   2
 -11  -1   7 10.1519 12.7924   1
  11  -1  -7 32.1936 43.5953   1
 -11  -1  -7-10.7208 6.51179   2
 -11   1  -7 4.70908 3.70238   2
  11   1  -7-34.4538 41.3003   1
 -11   1  -7 8.54286 2.64229   2
  11  -1  -8 32.8172 55.0612   1
 -11   1   8 0.41566 12.4726   1
  11   1  -8 59.5143 47.1760   1
 -11   1  -8-16.2990 22.4599   4
 -11  -1   8-18.1981 17.8451   1
 -11  -1  -9 98.7414 9.66326   2
  11  -1  -9 65.8595 66.2433   1
 -11   1   9 53.0837 16.3094   1
  11   1  -9 151.732 52.7905   1
 -11  -1   9 37.5661 15.6005   1
 -11   1  -9 64.1628 23.5659   4
 -11   1  10 7.03771 15.2484   1
  11   1 -10 36.4579 46.9267   1
 -11  -1  10 8.89956 15.5593   1
 -11   1 -10 36.8677 24.4348   4
 -11   1  11-7.26223 15.9571   1
 -11   1 -11 32.9290 22.2759   4
 -12  -1   0 1600.34 34.4336   2
 -12   1   1 23.5538 12.7907   2
 -12  -1   1-6.17892 14.1667   2
 -12  -1  -1 30.3150 10.6982   2
  12   1  -1 17.3409 40.5788   1
 -12   1   2-22.6675 15.7121   2
 -12   1  -2-5.18834 9.54384   2
  12   1  -2-15.8443 41.5964   1
 -12  -1   2-21.9033 15.5533   2
 -12  -1  -2-8.11972 8.60836   2
 -12  -1   3 494.707 28.3381   2
 -12  -1  -3 365.805 15.5056   2
 -12  -1  -4 458.260 15.5291   2
  12   1  -4 719.283 71.6458   1
  12  -1  -5 627.639 84.1945   1
  12   1  -5 368.538 62.4504   1
  12  -1  -6-15.9799 70.0002   1
 -12   1  -6 3.71760 4.71166   2
  12   1  -6 9.21047 52.2835   1
 -12  -1   6 21.7203 13.3108   1
 -12  -1  -7 1262.10 23.7696   2
  12   1  -7 1954.62 120.007   1
 -12   1  -8 147.165 26.6086   4
 -12  -1  -8 216.482 13.3135   2
 -12  -1  -9 504.802 17.5407   2
  12   1  -9 718.159 97.9886   1
 -13  -1   0 9.74029 16.6928   2
 -13  -1   1 884.778 43.2519   2
 -13  -1  -1 612.035 25.5349   2
 -13   1   2 130.798 26.2474   2
 -13   1  -2 64.4532 13.4340   2
 -13  -1  -2 112.308 16.0721   2
 -13  -1   3 653.892 43.8074   2
  13   1  -3 715.930 101.218   1
 -13   1   4 171.959 39.2700   2
 -13   1  -4 15.2701 8.15678   2
 -13  -1  -4 68.4059 11.9952   2
  13   1  -4 120.710 84.0949   1
 -13   1   5 1691.20 86.0885   2
  13   1  -5 1683.35 150.498   1
 -13  -1  -6 243.871 15.7069   2
  13  -1  -6 1696.52 237.524   1
  13  -1  -7 1150.70 273.842   1
  13   1  -7 580.719 147.008   1
 -14   1   0 122.142 29.0688   2
 -14   1   1 17.8799 32.9157   2
 -14   1  -1 118.499 20.6928   2
 -14   1  -2 15.6109 14.7534   2
 -14  -1   2 53.1428 49.7999   2
 -14  -1  -2 37.9519 25.1488   2
 -14   1  -3-4.25371 11.7338   2
 -14  -1  -3 24.2047 20.4695   2
  14   1  -3 152.719 211.967   1
 -14   1   3 21.7415 53.8337   2
 -14   1   4 144.841 87.2125   2
  14   1  -4-333.091 289.986   1
 -14   1   5 370.473 230.785   2
   0   2   0 24953.5 127.626   1
   0  -2   0 23294.3 104.234   1
   0   2   2 87.3657 15.4257   1
   0  -2  -2 63.8348 12.6039   1
   0  -2   2 79.9433 10.6921   1
   0   2  -2 95.1905 8.28261   3
   0   2   3-3.44202 15.1873   1
   0   2  -3-5.36212 13.9620   1
   0   2  -3-7.13433 6.48677   3
   0  -2   3-7.21748 8.94755   1
   0  -2  -3-14.0405 9.49588   2
   0  -2  -3 1.18854 12.5316   1
   0   2  -4 8628.29 82.9675   1
   0   2   4 9680.18 99.5419   1
   0  -2  -4 10157.9 66.7850   2
   0   2  -4 9078.23 64.9876   3
   0  -2  -4 8920.19 92.0263   1
   0  -2   4 8546.07 78.8061   1
   0   2  -5-6.04592 12.5182   1
   0  -2  -5 16.6951 19.8546   1
   0   2  -5 12.1699 7.89064   3
   0   2   5-0.17940 13.2873   1
   0  -2  -5-0.83350 8.55971   2
   0   2  -5 11.9798 9.36013   2
   0  -2   5-4.88853 10.0980   1
   0   2  -6 338.552 16.2864   3
   0   2  -6 259.060 13.9817   1
   0   2   6 322.138 22.2346   1
   0  -2   6 332.182 19.7971   1
   0  -2  -6 309.753 23.0895   1
   0  -2  -7 12.2707 20.6398   1
   0   2  -7 6.71051 5.79512   3
   0   2   7 8.42614 14.0908   1
   0  -2  -7 2.30279 9.27150   2
   0  -2   7 34.3667 13.1897   1
   0   2  -7 0.52119 7.20045   1
   0   2  -8 909.693 25.9532   3
   0   2   8 998.408 35.9490   1
   0  -2   8 860.567 28.7098   1
   0  -2  -9 8.71467 18.3936   1
   0  -2   9 19.9966 14.3895   1
   0  -2  -9 21.7000 11.6615   2
   0   2  -9 6.01035 11.8253   2
   0   2   9-2.30551 13.8780   1
   0   2  10 930.421 38.9798   1
   0  -2  10 839.486 36.5087   1
   0  -2 -11 0.54684 20.8037   1
   0   2  11-19.5199 17.8859   1
   0   2 -11 31.2338 14.6195   2
   0  -2 -11 8.63879 16.1231   2
   0   2  12 77.7059 24.7186   1
   0   2 -12 81.3093 18.1321   2
   0  -2 -12 58.4390 21.5328   1
   0   2  13 7.58997 24.2651   1
   0   2 -13-9.03722 21.9479   2
   0   2  14 1582.61 91.0206   1
   0   2 -15 26.4319 51.0901   2
   0   2  15 65.8378 80.2294   1
  -1   2  -1-21.9568 13.6622   1
   1   2   1 14.7172 10.7385   2
  -1  -2  -1-7.91610 8.10988   2
   1   2   1-26.2274 17.6781   1
   1   2  -2 166.295 17.4144   1
  -1   2  -2 166.850 13.8865   1
  -1   2   2 204.151 19.0410   1
   1  -2  -2 217.477 13.2472   2
  -1  -2  -2 179.874 18.2037   1
   1  -2  -2 124.046 14.6585   1
  -1  -2   2 157.952 12.9521   1
   1  -2   2 177.119 13.4952   1
  -1   2  -2 144.426 10.1885   3
   1   2   3 49.3362 11.6128   1
  -1   2  -3 41.8348 10.0741   1
  -1   2   3 72.4880 14.9828   1
  -1   2  -3 70.3108 8.82685   3
  -1  -2   3 40.5405 8.45045   1
   1  -2  -3 40.7822 11.3087   2
   1  -2   3 46.9013 10.2227   1
   1   2  -3 71.9924 7.25430   3
   1   2  -3 39.9922 9.40221   2
  -1   2  -3 11.6454 9.74209   2
   1   2  -3 76.2753 14.7598   1
   1  -2  -3 55.1235 15.4433   1
  -1  -2  -3 58.2141 15.2150   1
   1   2   4 403.112 22.7742   1
  -1   2  -4 478.440 17.0081   1
  -1  -2  -4 570.946 17.1706   2
  -1  -2  -4 619.692 29.9063   1
   1  -2  -4 603.794 31.5583   1
   1   2  -4 465.724 15.6875   3
  -1  -2   4 466.854 22.0662   1
   1   2  -4 408.258 22.1789   1
  -1   2  -5 320.875 15.4492   3
   1   2   5 297.713 19.9385   1
  -1   2  -5 254.834 9.07921   1
  -1   2   5 316.397 21.6169   1
   1  -2  -5 385.823 17.3321   2
   1   2  -5 211.249 13.2030   2
  -1  -2   5 280.800 17.2549   1
   1  -2   5 286.989 16.8994   1
   1  -2  -5 247.307 21.7135   1
  -1  -2  -5 331.877 14.2050   2
   1   2  -5 305.513 13.4758   3
   1   2  -5 226.831 17.9409   1
  -1   2  -6 562.456 21.3969   3
   1   2  -6 353.641 21.0350   1
   1   2   6 697.673 34.1653   1
  -1   2   6 556.359 27.5308   1
  -1  -2  -6 537.741 18.2260   2
   1  -2  -6 651.462 21.2034   2
   1   2  -6 368.912 16.9379   2
  -1  -2   6 478.948 23.4009   1
   1  -2   6 470.632 22.7681   1
   1   2  -6 525.954 17.7857   3
   1  -2  -6 427.495 29.3493   1
   1  -2  -7 248.844 16.5493   2
   1   2  -7 175.401 16.9795   1
   1   2  -7 166.400 10.9611   3
   1   2   7 196.414 19.4408   1
  -1   2   7 206.542 20.4646   1
  -1  -2  -7 250.099 15.6945   2
   1  -2   7 199.785 17.6110   1
  -1  -2   7 168.107 16.1981   1
   1  -2  -7 233.951 29.1666   1
  -1   2  -7 153.383 12.0976   3
   1   2  -8 1360.85 31.9272   1
  -1   2  -8 1557.33 32.8215   3
   1   2   8 2157.45 50.7670   1
  -1   2   8 1940.52 48.5027   1
  -1  -2  -8 2102.94 33.9977   2
   1  -2  -8 2059.82 36.9616   2
   1  -2   8 1600.28 37.7054   1
  -1  -2   8 1391.21 36.3677   1
  -1  -2  -8 2673.16 69.8553   1
   1  -2  -8 1881.63 59.1933   1
   1   2   9 1.47720 15.6295   1
   1  -2  -9 15.5432 19.5153   1
  -1  -2  -9-1.85241 18.2273   1
  -1   2   9 31.9567 16.4398   1
   1  -2  -9 34.9264 11.7397   2
  -1  -2  -9 10.9119 11.0298   2
  -1  -2   9 26.3679 15.4528   1
  -1   2  -9 26.0799 12.0916   2
   1   2  -9 22.9928 13.1004   2
  -1  -2  10 263.588 26.8697   1
   1   2  11 88.6198 20.6965   1
  -1   2  11 90.4702 21.6441   1
  -1  -2 -11 80.9462 14.9461   2
  -1  -2  11 97.2460 24.1789   1
   1   2 -11 47.7763 15.5942   2
  -1   2 -11 47.0286 14.2892   2
   1  -2 -11 72.1613 26.5296   1
   1   2  12 821.968 46.2481   1
  -1   2  12 707.986 41.1387   1
  -1   2  13 131.614 29.2394   1
   1  -2 -13 28.9587 22.4340   1
  -1  -2 -13 77.2222 23.1595   2
   1   2  13 96.1177 34.8131   1
   1   2 -13 83.9686 25.4492   2
  -1   2 -13 9.15288 19.3629   2
   1   2 -14 104.121 37.7347   2
  -1   2 -14 123.451 30.0995   2
   1   2 -15 473.758 72.8476   2
  -1   2 -15 250.757 46.9463   2
  -2   2   0 945.752 24.9673   1
   2  -2   0 966.261 27.6532   1
  -2  -2   1-15.7965 12.2539   1
  -2   2   1 0.13971 10.7920   1
  -2   2  -1-1.63782 9.11540   1
  -2  -2   1-3.45764 8.60253   2
   2   2  -1-5.74613 9.45958   2
  -2  -2  -1 17.4473 12.6628   1
   2   2   1 17.0859 14.6276   1
   2  -2  -1 12.4114 11.0428   1
   2  -2   1-1.01710 6.94507   1
   2   2  -2 645.802 34.1535   1
   2  -2  -2 713.364 20.8341   2
   2   2   2 533.132 27.2477   1
  -2   2  -2 375.679 13.8052   1
  -2   2  -2 402.258 10.8695   2
  -2  -2  -2 544.029 14.9571   2
   2   2  -2 385.574 16.0002   2
  -2   2  -2 253.438 12.7359   2
  -2   2   2 576.170 24.3590   1
  -2  -2  -2 557.798 24.0208   1
   2  -2  -2 435.415 22.2834   1
  -2  -2   2 513.407 20.1231   1
   2  -2   2 485.983 18.4979   1
  -2   2  -2 418.171 14.9190   3
   2   2  -3 59.3156 10.4585   2
  -2   2  -3 88.1517 10.9460   3
  -2  -2   3 70.6305 10.1778   1
   2   2  -3 97.8410 23.7181   1
   2   2  -3 93.7789 7.75419   3
  -2   2  -4 251.134 14.9652   3
   2   2  -4 222.602 24.4255   1
   2   2  -4 278.002 11.3900   3
   2   2   4 277.187 22.1889   1
  -2   2  -4 144.537 6.90736   2
  -2   2   4 214.581 19.0058   1
  -2  -2  -4 261.932 11.4897   2
  -2  -2  -4 340.111 24.5634   1
   2  -2  -4 218.279 21.3981   1
  -2  -2   4 272.804 19.0204   1
   2  -2   4 161.837 11.1410   1
  -2   2  -5 292.515 16.2922   3
  -2   2  -5 195.185 8.01988   2
   2   2   5 257.874 16.9866   1
  -2  -2  -5 316.906 12.9189   2
   2   2  -5 323.706 25.8020   1
  -2  -2   5 250.460 17.1446   1
  -2  -2  -5 402.183 24.9686   1
   2  -2   5 319.162 18.2257   1
   2  -2  -5 213.035 17.5634   1
   2   2  -5 349.334 13.4817   3
  -2   2   5 312.148 22.1646   1
  -2   2  -6 4283.42 56.9436   3
   2   2  -6 4149.73 40.6067   3
  -2   2   6 4233.51 68.7012   1
   2   2   6 4040.39 60.3753   1
  -2  -2  -6 4156.68 40.4753   2
   2  -2  -6 4140.93 48.8155   2
  -2  -2   6 3736.93 58.0838   1
   2  -2   6 4516.98 59.3226   1
  -2  -2  -6 4752.51 64.7845   1
   2  -2  -6 3827.22 75.9681   1
   2   2  -6 4024.94 71.1641   1
  -2   2  -7 226.672 14.5705   3
   2   2  -7 253.346 24.0321   1
   2   2   7 277.995 21.1267   1
  -2  -2  -7 271.662 13.0616   2
   2  -2  -7 286.010 17.0916   2
  -2   2   7 273.563 22.3292   1
   2  -2   7 258.142 18.3303   1
  -2  -2   7 233.997 18.2386   1
   2  -2  -7 275.099 30.5704   1
   2   2  -8 504.560 32.4278   1
  -2   2  -8 463.107 19.9044   3
   2   2   8 707.959 31.9230   1
  -2   2   8 582.680 30.5285   1
  -2  -2  -8 580.465 18.1328   2
  -2  -2   8 467.713 25.4388   1
  -2  -2  -8 745.718 34.9774   1
   2  -2  -8 484.060 35.0338   1
  -2  -2  -9 1080.71 27.1075   2
   2   2  -9 725.175 32.9367   1
   2   2   9 1126.60 41.0665   1
  -2   2   9 922.639 37.2591   1
  -2  -2   9 602.524 28.1104   1
   2  -2  -9 830.465 44.8966   1
   2   2  10 3872.24 75.1075   1
  -2   2  10 3271.97 68.1494   1
  -2  -2 -10 3405.94 48.4382   2
  -2  -2  10 3025.62 69.6085   1
   2  -2 -10 3216.89 81.8088   1
  -2  -2 -10 3692.68 71.9809   1
   2   2  11 75.8989 20.9680   1
  -2  -2  11 33.8061 24.1664   1
  -2  -2 -11 30.8516 15.1517   2
  -2   2  11 57.5986 18.8118   1
   2   2 -11 50.3598 18.2679   2
  -2   2 -11 33.2138 13.3165   2
   2   2  12 1207.74 55.7411   1
  -2   2  12 827.585 44.5938   1
  -2  -2 -12 1006.67 33.8821   2
  -2  -2  12 845.060 53.8469   1
   2  -2 -12 603.214 44.3515   1
   2  -2 -13-5.11095 21.5791   1
  -2  -2  13 77.8465 44.5874   1
  -2  -2 -13 43.5066 24.7526   2
   2   2 -13-9.96393 28.2602   2
  -2   2 -13 16.5367 19.3747   2
  -2   2  13 29.8014 24.0739   1
   2   2  13 100.219 34.9539   1
   2   2 -14 345.839 50.5333   2
  -2   2 -14 96.0418 27.0140   2
  -2  -2 -15 122.208 65.6073   2
   2   2 -15 162.745 85.5188   2
  -2   2 -15 80.3515 37.5380   2
  -2   2  15 92.6808 71.3580   1
  -3   2   0-3.27790 9.53831   1
   3   2   0-12.4911 10.6102   2
   3   2   0 3.53466 16.5378   1
  -3  -2   0-7.69062 12.2885   1
   3  -2   0 9.67822 9.31882   1
  -3  -2  -1 254.975 11.9331   2
  -3   2   1 214.506 16.2198   1
  -3  -2  -1 261.100 20.4332   1
   3  -2   1 203.698 16.3796   1
   3  -2  -1 210.724 16.9814   1
  -3   2  -2 8586.57 72.3121   3
   3   2  -2 9791.76 107.606   1
   3   2   2 8580.77 92.3298   1
  -3  -2  -2 8569.79 53.6460   2
  -3   2   2 8080.44 76.6427   1
  -3   2  -2 8451.42 34.7827   1
  -3  -2  -2 9331.08 85.6741   1
   3  -2  -2 7918.44 86.2381   1
  -3  -2   2 8164.94 76.8952   1
   3  -2   2 7862.58 68.0852   1
   3   2  -3 25.1156 5.52071   3
  -3   2  -3 10.4261 9.18041   3
   3  -2  -3-5.34474 15.1305   1
   3  -2   3-23.4759 14.9533   1
  -3  -2   3 12.4937 8.70573   1
  -3  -2   3-11.0101 10.3609   2
  -3   2   3-23.2574 15.5217   1
   3   2  -3-1.22672 10.5560   2
   3   2  -3 12.7641 21.3369   1
   3   2   3-4.58912 15.5954   1
  -3  -2  -3-10.8552 15.2284   1
  -3  -2  -4-15.5295 15.1758   1
  -3  -2   4-3.74547 11.9196   1
   3  -2  -4 1.78569 16.9764   1
   3   2  -4 8.48416 5.70836   3
  -3   2  -4 8.73532 9.57066   3
  -3   2  -4-6.83052 4.71068   2
  -3  -2  -4-5.72619 5.87885   2
  -3   2   4 14.8683 13.9357   1
   3  -2   4 3.10732 10.0450   1
   3   2  -4-6.07110 10.4736   2
  -3   2  -4 10.1488 8.71835   2
   3   2  -4 0.55094 18.9698   1
   3   2   4 6.37383 12.5210   1
   3   2  -5 406.068 29.7314   1
   3   2  -5 445.171 14.4944   3
   3   2   5 311.596 21.2583   1
  -3   2  -5 263.946 15.6645   3
  -3  -2  -5 299.316 11.3610   2
  -3   2   5 306.784 22.6327   1
  -3  -2  -5 405.929 23.9477   1
  -3  -2   5 291.066 19.3756   1
   3  -2  -5 237.573 20.6846   1
   3  -2   5 291.640 15.3047   1
   3   2  -6 3830.69 74.5197   1
   3   2   6 3771.73 58.2507   1
  -3   2  -6 4197.62 58.0925   3
  -3   2   6 3950.65 65.9378   1
  -3  -2  -6 4051.81 38.3372   2
  -3  -2   6 3863.14 62.6364   1
  -3  -2  -6 4189.53 58.4417   1
   3  -2  -6 4127.20 88.6743   1
   3   2  -7 117.063 22.9556   1
  -3   2  -7 87.6766 11.6660   3
   3   2   7 99.1608 14.0091   1
  -3  -2  -7 96.9266 9.20361   2
  -3   2  -7 44.9107 10.3558   2
  -3   2   7 79.9783 15.6482   1
   3   2  -7 53.8338 12.8062   2
  -3  -2  -7 146.989 21.5789   1
   3  -2  -7 100.787 27.4340   1
  -3   2  -8 786.873 25.8752   3
   3   2  -8 1072.41 47.4111   1
   3   2   8 1313.00 39.7428   1
  -3   2   8 968.283 35.5166   1
  -3  -2  -8 1284.74 25.6224   2
  -3  -2   8 898.651 34.6254   1
  -3  -2  -8 1097.94 34.9419   1
   3  -2  -8 792.398 39.3438   1
  -3   2  -9 51.4315 12.8576   3
   3   2   9 71.3676 17.8262   1
   3  -2  -9 28.0576 22.4148   1
  -3  -2  -9 64.3688 18.9593   1
  -3  -2  -9 64.5999 10.4717   2
  -3   2   9 27.8515 14.8476   1
   3   2  -9 61.4971 15.4882   2
  -3   2  -9 20.3064 10.5498   2
  -3  -2   9 49.6580 16.1477   1
   3   2  -9 52.5570 19.0440   1
   3   2 -10 178.041 23.3864   1
  -3   2  10 217.346 22.7221   1
   3   2 -10 135.277 19.7465   2
  -3  -2  10 223.538 23.0258   1
   3  -2 -10 195.889 30.9228   1
   3   2  11 19.8643 18.9116   1
   3  -2 -11 1.60841 24.9114   1
  -3  -2 -11 46.5875 13.7786   2
  -3  -2  11-20.8166 24.5722   1
   3   2 -11 22.0231 19.5930   2
  -3   2 -11-13.6833 12.1960   2
  -3   2  11 15.9302 17.2611   1
   3   2  12 1719.13 67.4431   1
  -3   2  12 1041.34 49.4311   1
  -3  -2 -12 1438.18 41.4997   2
  -3  -2  12 1066.17 58.1284   1
   3  -2 -12 683.587 44.4121   1
   3   2  13 233.087 44.7059   1
   3  -2 -13 89.3912 23.2430   1
   3   2 -13 98.0856 34.4159   2
  -3   2 -13 41.0330 18.0373   2
  -3  -2  13 168.720 45.8731   1
  -3   2  13 135.950 29.6070   1
   3  -2 -14 69.6008 25.3161   1
   3   2 -14 100.666 53.4762   2
  -3   2 -14 29.5327 22.0859   2
  -3   2  14 122.150 38.9562   1
  -3  -2 -15-13.6033 70.7703   2
  -3   2 -15 37.8570 31.1750   2
  -3   2  15 0.21653 68.9141   1
   4  -2   0 63.3851 13.1180   1
  -4   2   0 45.5086 8.28168   1
   4   2   0 49.3467 19.0095   1
  -4   2  -1 220.297 13.4064   3
  -4  -2  -1 277.811 12.1728   2
   4   2   1 221.552 20.5009   1
  -4   2  -1 160.193 7.73160   2
  -4   2   1 221.511 14.2817   1
  -4   2  -1 241.561 7.21613   1
  -4  -2  -1 317.134 20.8294   1
   4  -2   1 225.826 16.3139   1
   4  -2  -1 186.830 17.1446   1
  -4   2  -2 1290.07 31.2512   3
   4   2   2 1595.19 46.2201   1
  -4  -2  -2 1223.33 20.2458   2
  -4   2  -2 955.893 15.7474   2
  -4   2   2 1208.95 30.2203   1
  -4  -2  -2 1323.11 32.7872   1
   4  -2  -2 940.160 30.0675   1
   4   2  -2 1617.53 49.7858   1
  -4  -2   2 1580.24 37.2080   1
   4  -2  -3-4.84323 15.7229   1
   4   2  -3 10.4121 4.82973   3
  -4   2  -3 0.88922 9.02555   3
  -4  -2   3 5.79640 10.1004   1
  -4  -2   3 10.9349 8.96830   2
  -4   2  -3-3.07407 4.94464   2
   4   2  -3 0.61377 10.5146   2
  -4   2   3 4.66591 11.9642   1
  -4   2  -3 0.08268 8.64466   2
   4  -2   3 5.12265 10.2867   1
   4   2  -3 11.8052 20.2417   1
   4   2   3 19.4533 14.5736   1
  -4  -2  -3-6.75604 12.7027   1
  -4   2  -4 48.4752 11.5552   3
   4   2  -4 61.3942 6.45143   3
  -4  -2  -4 79.1445 14.7187   1
  -4  -2   4 29.6882 10.9439   1
   4   2  -4 55.8410 12.0708   2
  -4   2  -4 29.7135 9.30088   2
  -4   2   4 52.3415 13.7806   1
   4  -2  -4 55.8027 12.8201   1
   4   2   4 44.9847 11.8954   1
   4  -2   4 37.4808 11.1068   1
   4   2  -4 88.0908 23.7492   1
  -4   2   5 73.3531 16.4471   1
  -4   2  -5 30.0171 9.79671   2
  -4  -2  -5 24.5566 6.62448   2
   4   2  -5 25.3608 11.7213   2
  -4  -2  -5 63.4044 16.3992   1
   4  -2  -5 65.4863 22.2094   1
   4   2  -5 29.1972 21.4527   1
  -4   2  -5 51.4566 11.3385   3
   4   2   5 36.3630 12.9922   1
  -4  -2   5 27.1202 14.7460   1
  -4   2  -6 1105.31 33.0110   3
   4   2   6 1275.34 39.1516   1
  -4  -2  -6 1130.87 19.9728   2
  -4   2   6 1109.21 36.8887   1
  -4  -2   6 1089.65 36.6451   1
  -4  -2  -6 1217.22 33.9158   1
   4  -2  -6 1207.89 51.7542   1
   4   2  -6 1137.68 47.5863   1
   4  -2  -7 61.1454 21.7850   1
  -4  -2  -7 84.0748 9.03352   2
  -4   2   7 116.077 18.0251   1
   4   2   7 71.2868 17.2788   1
   4   2  -7 63.9781 13.4952   2
  -4   2  -7 37.7557 9.71799   2
   4   2  -7 79.9258 24.3385   1
  -4   2  -7 57.2134 11.3103   3
   4   2   8 56.4886 14.2420   1
  -4   2  -8 35.7425 10.2481   3
   4  -2  -8 28.2432 15.8512   1
  -4  -2  -8 70.0136 16.4890   1
  -4   2   8 60.5960 17.1458   1
  -4   2  -8 46.3050 10.0040   2
   4   2  -8 17.5605 13.8048   2
  -4  -2   8 55.9911 15.4416   1
   4   2  -8 40.4824 22.4311   1
  -4   2  -9 225.636 18.7634   3
  -4  -2  -9 347.989 15.8581   2
  -4   2   9 288.809 24.5302   1
  -4  -2   9 290.838 24.4570   1
   4   2  -9 269.021 30.3498   1
   4  -2  -9 280.665 34.8866   1
   4   2  10 1177.42 48.3785   1
  -4  -2 -10 1080.61 29.2803   2
  -4   2  10 625.585 33.1675   1
  -4  -2  10 597.941 34.9307   1
   4   2 -10 543.118 36.5435   1
   4  -2 -10 538.027 39.7608   1
   4   2 -11 561.444 40.1688   1
   4   2  11 845.570 47.7708   1
  -4  -2 -11 623.160 24.0466   2
  -4   2  11 391.522 28.7733   1
  -4  -2  11 467.030 34.9732   1
   4  -2 -11 263.455 36.1318   1
   4  -2 -12 16.7384 25.0888   1
  -4  -2 -12 56.4717 17.0413   2
   4   2 -12 8.96449 30.7577   2
  -4   2 -12 18.2155 13.7393   2
  -4  -2  12 53.4118 28.3017   1
  -4   2  12 22.7425 21.1352   1
   4  -2 -13 54.1019 22.8848   1
  -4  -2  13 151.733 41.4439   1
  -4   2 -13 54.4924 17.1644   2
  -4   2  13 120.868 32.2056   1
   4  -2 -14 61.3321 22.6015   1
  -4   2 -14 64.5896 21.5255   2
  -4  -2  15 2480.57 279.657   1
   4  -2 -15 287.624 33.8053   1
  -5   2   0-1.32554 7.85018   3
  -5  -2   0 3.37847 9.08811   1
   5   2   0 37.2361 16.2685   1
   5  -2   0 31.9902 13.7009   1
  -5   2  -1 242.953 15.1218   3
  -5  -2  -1 257.440 11.0808   2
  -5  -2  -1 316.957 20.7147   1
   5  -2   1 260.333 18.2065   1
   5  -2  -1 270.683 21.4470   1
   5   2   1 257.400 21.4139   1
   5   2  -2 1122.46 44.5522   1
  -5  -2  -2 907.998 18.6003   2
  -5   2   2 875.561 25.3844   1
   5   2   2 814.827 30.3516   1
   5  -2   2 899.168 27.6111   1
  -5  -2  -2 928.242 27.7411   1
   5  -2  -2 873.430 35.5359   1
  -5  -2   2 1169.65 33.8450   1
  -5   2  -2 867.860 26.3546   3
   5  -2  -3 3.71752 10.7403   1
  -5   2  -3 4.71165 10.4421   3
  -5  -2   3 4.71030 12.5826   1
  -5  -2  -3-2.35163 6.44620   2
   5   2  -3-6.53729 24.5229   1
  -5   2   3-6.57496 13.4253   1
   5   2   3-5.18065 14.3680   1
  -5  -2  -3-0.54263 12.1276   1
   5   2   4 931.787 35.0738   1
  -5   2  -4 899.044 29.1859   3
  -5  -2  -4 866.596 17.2873   2
  -5   2   4 898.056 30.4898   1
  -5  -2  -4 967.950 30.2598   1
   5  -2  -4 729.201 33.1295   1
  -5  -2   4 783.099 24.7287   1
  -5   2  -5 153.915 15.3707   3
   5   2   5 128.482 15.0438   1
  -5   2  -5 112.298 5.57289   2
  -5  -2  -5 184.471 9.81878   2
  -5   2   5 154.129 16.9636   1
  -5  -2  -5 253.199 20.6136   1
  -5  -2   5 193.217 20.7799   1
   5   2  -5 237.477 35.0079   1
  -5   2  -6 455.571 22.7840   3
  -5  -2  -6 555.233 14.4852   2
  -5   2   6 575.958 27.4781   1
  -5  -2  -6 746.488 27.3043   1
   5  -2  -6 622.253 42.1163   1
   5   2   6 594.618 27.8092   1
   5   2  -6 677.496 47.2972   1
  -5  -2  -7 20.7242 14.4275   1
   5  -2  -7 17.5712 17.7962   1
  -5  -2  -7 7.05513 7.02867   2
  -5   2  -7 10.0439 8.46100   2
  -5   2  -7 14.5830 10.1008   3
  -5   2   7 50.5830 15.6535   1
   5   2  -7-3.27502 27.6761   1
  -5  -2   7 7.33532 14.6962   1
   5   2   7 21.6445 16.4206   1
  -5   2  -8 1702.93 39.3702   3
  -5  -2  -8 2589.79 33.7731   2
  -5   2   8 1995.45 50.8053   1
   5   2  -8 2493.81 79.5413   1
  -5  -2   8 2199.71 57.8216   1
   5  -2  -8 1966.92 64.6585   1
   5  -2  -9 62.1932 24.8679   1
  -5  -2  -9 118.479 11.4097   2
  -5   2  -9 54.3020 10.1450   2
  -5   2   9 79.7695 19.5177   1
  -5  -2   9 80.5717 18.8551   1
  -5  -2  10 1037.30 45.4763   1
   5  -2 -10 974.120 52.1525   1
   5   2 -10 917.020 50.0202   1
   5   2 -11 223.082 30.5566   1
   5  -2 -11 142.514 29.8637   1
  -5  -2 -11 337.681 20.5239   2
  -5   2  11 265.838 28.2239   1
  -5   2 -11 90.8432 12.4845   2
  -5  -2  11 204.275 28.4558   1
  -5   2  12 1674.34 63.6589   1
  -5  -2  12 1596.50 70.6043   1
   5  -2 -13 11.9827 23.7414   1
  -5  -2 -13 88.5964 27.5030   2
  -5   2 -13 35.8959 14.9126   2
  -5  -2  13 37.1139 46.0522   1
  -5   2  13 51.9235 31.5100   1
  -5   2 -14 61.0841 17.2445   2
   5  -2 -14 86.4340 25.3342   1
  -6   2   0 6922.31 69.1991   3
  -6  -2   0 6989.26 66.2034   1
   6   2   0 6978.60 94.8147   1
  -6   2  -1 552.815 22.3096   3
  -6  -2   1 509.502 16.0028   2
  -6   2   1 494.542 19.8547   3
  -6   2   1 491.634 15.4757   1
   6  -2   1 656.709 28.8448   1
   6  -2  -1 719.070 37.0312   1
  -6  -2   1 602.202 25.2372   1
   6   2  -1 560.757 36.1835   1
   6   2   2 192.776 20.0055   1
  -6   2  -2 182.293 14.9145   3
  -6  -2  -2 179.596 9.50158   2
  -6   2   2 168.119 12.7291   1
  -6  -2  -2 226.607 18.8757   1
   6  -2  -2 160.559 19.2689   1
  -6  -2   2 218.508 18.0389   1
   6   2   3 458.504 25.0452   1
  -6   2  -3 466.962 22.1127   3
  -6   2   3 478.026 19.8545   1
  -6  -2  -3 509.109 14.3326   2
  -6  -2  -3 495.021 22.5934   1
   6  -2  -3 470.870 28.0197   1
  -6  -2   3 637.050 26.9093   1
   6   2  -3 670.115 39.5945   1
  -6   2  -4 3405.25 52.9628   3
  -6  -2  -4 3642.22 34.8973   2
  -6   2   4 3758.58 55.4423   1
  -6  -2  -4 3577.16 49.5870   1
   6   2   4 4179.43 70.5069   1
   6  -2  -4 4121.48 86.7522   1
  -6  -2   4 3905.09 55.1344   1
  -6   2  -5 687.172 28.4684   3
  -6  -2  -5 751.716 17.0830   2
  -6   2   5 780.831 30.6495   1
   6   2   5 938.955 37.7164   1
  -6  -2  -5 756.114 24.8152   1
  -6  -2   5 851.962 30.0085   1
   6  -2  -5 833.644 46.2237   1
   6   2  -5 944.179 48.9970   1
   6   2   6 330.139 22.4268   1
  -6  -2  -6 301.395 11.8109   2
  -6   2   6 300.443 22.9755   1
   6  -2  -6 281.573 30.7470   1
   6   2  -6 331.119 35.2875   1
  -6  -2  -7 283.537 12.0667   2
  -6   2  -7 179.424 13.5207   3
  -6   2   7 251.167 23.3404   1
   6  -2  -7 204.468 24.8378   1
   6   2   7 257.295 24.5417   1
   6   2  -7 265.503 35.3657   1
  -6   2  -8 227.900 17.3441   3
   6   2   8 518.038 33.3432   1
  -6  -2  -8 407.946 15.5347   2
  -6   2   8 345.801 26.3317   1
   6  -2  -8 253.841 34.1610   1
   6   2  -8 350.183 36.5232   1
   6   2   9 32.9855 18.8338   1
  -6  -2  -9 1.82967 8.98537   2
  -6   2  -9 19.8614 8.98730   2
   6  -2  -9-36.9393 27.5445   1
   6   2  -9 22.0590 32.7714   1
  -6  -2   9 35.3698 20.1048   1
  -6   2   9 10.3472 17.6126   1
  -6   2  10 305.908 27.7816   1
   6   2 -10 354.490 42.6568   1
  -6  -2  10 280.832 28.8524   1
   6  -2 -10 232.026 32.0573   1
   6  -2 -11-15.0301 30.8187   1
  -6  -2 -11-8.88836 12.0795   2
  -6   2 -11 12.4488 9.87950   2
  -6  -2  11 12.9204 24.0060   1
   6   2 -11-8.37140 27.0320   1
  -6   2  11-11.3656 21.1756   1
   6  -2 -12 86.3656 29.8547   1
  -6   2 -12 45.4277 10.9032   2
   6   2 -12 110.591 26.0750   1
  -6   2  12 105.781 26.2020   1
   6  -2 -13 33.7090 27.5341   1
  -6  -2 -13 119.861 31.6923   2
  -6   2 -13 5.88141 10.8971   2
  -6  -2  13 128.368 56.1146   1
  -6   2  13 80.3328 29.5437   1
  -6  -2 -14 2704.29 106.387   2
  -6  -2  14 1799.14 173.473   1
   7  -2   0 14.0261 19.1560   1
  -7   2   0 6.43780 8.98847   3
  -7  -2   0 14.8252 11.9867   1
  -7  -2   0-0.06380 6.55557   2
   7   2   0-14.3774 19.9565   1
   7  -2  -1 18.9370 11.6843   1
  -7   2   1 13.7437 9.64814   3
  -7   2  -1 22.0781 9.55263   3
  -7  -2  -1 43.7478 7.47611   2
   7   2   1 17.6344 16.2531   1
  -7  -2   1 50.6014 13.2974   1
  -7  -2  -1 27.7413 12.6621   1
  -7   2  -2 641.666 25.5926   3
  -7  -2  -2 635.989 15.7905   2
  -7   2   2 624.851 16.9060   1
  -7  -2  -2 598.549 22.9690   1
   7  -2  -2 555.942 32.1337   1
   7   2   2 676.618 31.7390   1
  -7   2   2 548.376 19.9265   3
  -7   2   3-6.63684 11.8760   1
   7  -2  -3-16.2417 23.6655   1
  -7   2  -3-17.1183 12.9172   3
  -7  -2  -3-8.29279 6.64288   2
   7   2  -3-27.0609 22.0475   1
  -7  -2   3 20.8762 12.3099   1
   7   2   3-5.42570 16.9398   1
  -7  -2  -3-14.6073 10.9747   1
   7   2   4 304.975 24.4558   1
  -7   2  -4 254.962 19.1273   3
  -7  -2  -4 315.333 12.3600   2
  -7   2   4 324.103 18.7187   1
  -7  -2  -4 260.180 17.9672   1
   7  -2  -4 375.344 35.1566   1
  -7  -2   4 354.534 20.5736   1
   7   2  -4 427.407 34.0222   1
  -7   2  -5 2.84875 11.4982   3
   7  -2  -5-10.1790 21.6474   1
  -7  -2   5 4.26554 9.48955   1
  -7  -2  -5-2.18068 6.26095   2
   7   2  -5-2.81987 21.1375   1
   7   2   5 32.6109 19.0079   1
  -7   2   5 8.03376 12.1431   1
  -7  -2   6 10.3199 15.6532   1
  -7   2  -6 5.47120 9.72109   3
   7  -2  -6-21.3818 19.9386   1
  -7  -2  -6-1.49174 7.53746   2
   7   2  -6 6.18634 22.4447   1
   7   2   6 20.6313 17.8969   1
  -7   2   6 2.84048 14.0974   1
  -7   2  -7-1.95970 9.59299   3
   7  -2  -7 41.7185 26.7205   1
  -7  -2  -7-6.03228 7.56345   2
   7   2  -7-12.1090 23.0394   1
  -7   2   7 7.48262 15.3919   1
   7   2   7 31.4566 17.6761   1
  -7  -2   7 0.52200 15.9917   1
  -7   2  -8 292.037 20.6669   3
  -7   2   8 392.606 26.8358   1
  -7  -2   8 317.332 25.3177   1
   7  -2  -8 359.894 40.0569   1
   7   2  -8 359.555 37.4147   1
   7  -2  -9-25.6760 31.1950   1
  -7  -2  -9 23.3434 9.52534   2
   7   2  -9 8.89626 26.0771   1
  -7   2   9 12.3936 17.4546   1
  -7  -2   9 11.5623 16.9927   1
   7  -2 -10-5.99303 31.3893   1
  -7  -2 -10-8.80275 11.4987   2
  -7   2 -10 14.8926 7.85788   2
   7   2 -10 10.2378 32.7730   1
  -7  -2  10 39.0387 23.1058   1
  -7   2  10-1.52944 18.6111   1
  -7  -2 -11 230.153 20.4259   2
  -7   2  11 130.960 23.4182   1
  -7  -2  11 196.979 36.0291   1
   7  -2 -11 165.199 39.3932   1
   7   2 -11 133.761 34.1966   1
  -7  -2 -12 147.624 26.7800   2
   7  -2 -12 29.6886 31.2695   1
  -7   2 -12 22.4973 7.75882   2
   7   2 -12 90.5323 26.1444   1
  -7  -2  12 118.813 43.2659   1
  -7   2  12 125.435 22.8438   1
   7  -2 -13 14.5538 28.7694   1
  -7   2  13 92.6831 28.6140   1
  -7  -2 -13 127.471 38.5284   2
  -7   2 -13 1.57705 7.21623   2
  -7  -2  13 78.9181 58.3035   1
  -8   2   0 462.348 22.0195   3
  -8  -2   0 539.919 16.5862   2
  -8   2   1 9.95187 9.98103   3
  -8   2  -1-3.69618 11.8086   3
  -8  -2   1 4.73174 8.09814   2
   8  -2  -1 6.98638 20.6416   1
   8   2  -1-9.92281 19.5908   1
   8   2   1 14.2705 20.5328   1
  -8  -2  -1 1.97219 11.8522   1
  -8  -2   1 2.30668 11.3251   1
  -8   2   2 104.283 13.6359   3
  -8   2  -2 117.665 15.5729   3
   8  -2  -2 162.123 30.3976   1
  -8  -2  -2 152.762 10.1017   2
  -8  -2   2 128.676 18.3071   1
   8   2  -2 96.0452 25.2555   1
   8   2   3 902.682 39.7990   1
  -8   2  -3 750.994 29.1936   3
  -8  -2  -3 867.265 19.1457   2
  -8  -2  -3 682.537 24.2971   1
   8  -2  -3 1061.84 56.8877   1
  -8  -2   3 929.102 31.5017   1
   8   2  -3 848.983 44.7961   1
  -8   2   3 691.954 23.9581   3
   8   2   4 1399.21 52.0865   1
  -8   2  -4 894.577 34.2158   3
  -8  -2  -4 1124.33 22.6198   2
  -8   2   4 879.998 24.6277   1
   8  -2  -4 1082.01 54.1229   1
  -8  -2   4 1240.32 36.9072   1
   8   2  -4 1188.54 51.7421   1
  -8   2   4 976.131 30.4705   3
  -8   2  -5 20.8649 11.3193   3
   8  -2  -5 71.3194 21.6922   1
  -8  -2  -5 79.7919 8.70634   2
  -8   2   5 106.762 16.0907   1
   8   2  -5 62.7512 23.5166   1
  -8  -2   5 85.3090 15.0420   1
   8   2   5 66.8459 20.8970   1
   8   2   6 2134.04 68.9875   1
  -8   2  -6 786.728 26.5783   3
  -8  -2  -6 1626.14 27.1408   2
  -8   2   6 1357.96 39.7205   1
  -8  -2   6 1080.30 30.8783   1
   8  -2  -6 1552.26 68.8565   1
   8   2  -6 1362.82 56.6577   1
  -8  -2  -7 960.947 21.2778   2
  -8   2   7 889.817 37.2966   1
  -8  -2   7 900.553 39.0652   1
   8  -2  -7 929.291 57.8012   1
   8   2  -7 795.247 46.3982   1
  -8  -2  -8 377.883 15.0576   2
  -8   2   8 347.630 27.9980   1
  -8  -2   8 331.315 27.9105   1
  -8   2  -8 312.710 23.9412   3
   8  -2  -8 431.014 47.4128   1
   8   2  -8 337.034 37.7578   1
  -8   2   9 244.079 25.3060   1
  -8  -2   9 185.809 23.6954   1
   8   2  -9 236.623 35.9974   1
  -8   2  10 834.993 38.6748   1
   8   2 -10 764.384 51.0111   1
  -8   2  11 111.689 21.0172   1
  -8  -2  11 176.563 34.1215   1
   8  -2 -12 177.921 44.9216   1
  -8   2  12 116.210 23.2039   1
   8   2 -12 161.748 31.0562   1
   8   2 -13 95.3675 24.5104   1
  -9   2   0 5.72012 13.4199   3
   9   2   0-4.13670 23.4754   1
  -9  -2   0 13.4830 15.1927   1
  -9   2   1 675.755 30.2614   3
  -9  -2   1 816.743 23.3148   2
  -9   2  -1 608.893 28.1100   3
  -9  -2  -1 600.735 25.5945   1
  -9  -2  -1 658.143 19.3498   2
  -9  -2   1 588.612 22.4220   1
   9   2  -1 675.836 42.7114   1
   9   2   1 833.612 47.7771   1
  -9   2   2 2124.20 47.6034   3
  -9  -2   2 2348.70 38.9965   2
  -9  -2  -2 1996.77 30.7144   2
  -9  -2   2 2086.83 46.3938   1
   9   2  -2 1847.12 63.9793   1
   9   2   2 2275.62 67.6334   1
   9   2   3 129.712 25.6827   1
  -9   2   3 162.191 18.6703   3
  -9   2  -3 112.854 18.3796   3
  -9  -2  -3 138.117 10.9296   2
  -9   2   4 8.65573 14.1454   3
   9  -2  -4 14.3185 25.6743   1
  -9   2  -4-16.7413 12.8326   3
  -9  -2  -4 2.23705 8.03990   2
   9   2   4-34.7236 25.5572   1
  -9  -2   4 8.26672 13.1628   1
   9   2   5 285.102 32.0577   1
  -9   2  -5 146.067 16.9972   3
  -9  -2  -5 202.701 11.5406   2
   9  -2  -5 199.364 41.9611   1
  -9  -2   5 208.577 21.0318   1
   9   2  -5 244.692 31.8180   1
  -9   2   5 226.532 19.0058   3
  -9  -2  -6 1061.80 23.0157   2
  -9   2   6 821.337 30.4505   1
  -9  -2   6 665.414 30.6107   1
   9  -2  -6 1160.32 70.6308   1
  -9   2  -6 627.576 29.2883   3
   9   2  -6 905.428 52.3349   1
  -9   2   6 1077.34 39.3166   3
  -9   2   7 96.4881 16.0767   1
  -9   2  -7 48.9231 16.7280   3
  -9  -2   7 30.3849 11.7711   1
  -9  -2  -7 109.561 11.8249   2
   9   2  -7 55.5557 27.1516   1
   9  -2  -7 162.453 43.0291   1
  -9  -2   8 39.8495 16.3410   1
  -9   2   8-11.9737 16.1577   1
   9  -2  -8-25.0214 41.7098   1
  -9   2  -8 2.71797 3.32033   2
   9   2  -8 7.80033 29.0657   1
  -9   2   9 161.170 22.0414   1
  -9  -2   9 182.200 27.6754   1
   9   2  -9 197.552 36.4457   1
  -9   2  10 2.03753 16.8578   1
   9  -2 -10-27.1584 51.6901   1
  -9  -2 -10 6.94580 16.5955   2
   9   2 -10-37.2701 29.8671   1
  -9  -2  10-36.0876 31.1714   1
  -9   2  11-2.30479 16.7361   1
   9  -2 -11 13.0882 54.4665   1
  -9  -2 -11 6.95029 23.1064   2
   9   2 -11 21.4514 26.4640   1
  -9  -2  11-12.8345 28.7686   1
 -10   2   0 159.096 20.5622   3
 -10  -2   0 161.423 13.5577   2
  10   2   0 208.828 33.5851   1
 -10   2  -1 57.4040 16.5276   3
 -10  -2   1 87.5436 13.1513   2
 -10   2   1 89.6094 17.7257   3
 -10  -2   1 74.3005 15.7432   1
  10   2  -1 73.4140 25.6109   1
 -10   2   2 66.8227 18.2143   3
 -10   2  -2 52.2391 17.3104   3
 -10  -2   2 30.3166 10.3118   1
  10   2  -2 22.2262 24.7013   1
  10   2   2 59.7064 27.9492   1
 -10   2   3 366.772 26.6295   3
 -10   2  -3 276.016 22.9913   3
 -10  -2  -3 314.253 15.1500   2
 -10  -2   3 262.279 22.1549   1
  10   2  -3 346.277 39.1538   1
  10   2   3 395.839 40.2593   1
 -10   2  -4 185.722 19.9675   3
 -10  -2  -4 189.227 12.6457   2
 -10   2  -5-7.32978 14.4496   3
  10  -2  -5 23.0485 47.7696   1
 -10   2   5-26.1685 28.6885   2
 -10  -2  -5 0.82475 8.60898   2
  10   2  -5-21.6064 30.8414   1
 -10  -2   5 8.01464 14.7220   1
 -10   2  -6 25.0413 17.4336   3
 -10  -2  -6 83.8767 11.0188   2
  10  -2  -6 117.553 55.0638   1
 -10   2   6 130.092 39.0881   2
 -10  -2   6 24.2937 15.3399   1
  10   2  -6 82.0818 34.7553   1
  10  -2  -7-17.2870 60.0687   1
 -10  -2   7 0.69178 14.5772   1
 -10  -2  -7 23.1106 12.6087   2
  10   2  -7 23.7006 30.9879   1
  10  -2  -8 46.4278 66.6735   1
 -10  -2   8 30.2551 13.1904   1
  10   2  -8 28.9244 33.4983   1
 -10   2   9 10.2506 16.6989   1
 -10  -2   9 3.68331 13.2405   1
  10  -2  -9-7.56161 68.4038   1
 -10  -2  -9 19.1977 16.4704   2
  10   2  -9 29.2795 35.1778   1
 -10  -2  10-1.67250 20.3630   1
 -10   2  10 16.0732 15.1025   1
 -10  -2 -10 84.3830 24.1201   2
  10   2 -10 22.9072 31.5888   1
 -11   2   0-1.54676 20.4065   3
 -11  -2   0-15.4260 13.0184   2
  11   2   0-9.70801 36.4007   1
 -11   2   1 211.975 26.3302   3
 -11  -2  -1 196.968 16.6462   2
  11   2   1 194.480 46.2988   1
 -11   2  -1 174.683 27.8198   3
  11   2  -1 201.480 40.4674   1
 -11   2  -2 93.0067 21.9855   3
 -11   2   2 75.6572 25.7885   2
  11   2  -2 98.6274 37.1403   1
  11   2   2 134.231 40.7777   1
 -11   2   2 151.559 28.4864   3
 -11  -2   3 11.9750 11.1999   1
 -11   2   3-2.37378 28.9288   2
 -11  -2  -3 9.29397 10.9782   2
  11   2  -3-31.0885 35.7560   1
 -11   2  -3 8.45153 19.0288   3
 -11  -2  -4 859.417 26.6960   2
  11   2  -4 917.576 69.2190   1
 -11  -2  -5 982.542 28.6620   2
  11   2  -5 873.777 69.7180   1
 -11  -2  -6 477.691 22.8519   2
 -11   2  -6 464.614 45.8461   3
 -11  -2  -7 79.5613 19.2947   2
 -11  -2   7-6.87045 14.0190   1
  11   2  -7 5.87220 42.2705   1
 -11  -2   8 270.407 22.2040   1
  11   2  -8 612.536 66.8291   1
 -12  -2   0 880.406 38.8125   2
  12   2   0 788.573 83.6936   1
 -12   2  -1 746.090 57.2459   3
 -12  -2  -1 610.946 31.8436   2
  12   2  -1 724.319 82.9341   1
 -12   2  -2-25.9836 32.2008   3
 -12   2  -2 22.2354 21.3761   2
 -12   2   2 15.7009 36.0748   2
 -12  -2  -2 32.9248 18.8430   2
  12   2  -2-27.8804 53.3694   1
 -12   2  -3 205.657 39.9856   3
 -12   2  -3 76.0385 17.4660   2
 -12   2   3 68.5275 39.3553   2
  12   2  -3 157.576 62.4937   1
 -12   2  -4 932.702 65.8885   3
 -12  -2  -4 915.943 35.8670   2
  12   2  -4 857.289 93.4196   1
 -12   2  -5 462.928 65.1445   3
 -12   2   5 314.138 70.0629   2
 -12  -2  -5 435.033 29.5612   2
 -12  -2   5 89.6753 14.4194   1
  12  -2  -5 703.676 195.488   1
  12   2  -5 351.437 75.9976   1
 -12  -2   6 73.9566 16.8719   1
 -12   2  -6 37.5837 6.45678   2
  12  -2  -7 1502.94 293.951   1
 -12  -2   7 54.5639 16.1576   1
 -13   2   0 25.3130 31.4679   2
 -13  -2   0-76.5360 46.2200   2
 -13   2  -1 108.441 28.7913   2
 -13  -2  -1 163.046 40.5533   2
  13   2  -2 1303.85 170.489   1
  13   2  -3 834.743 159.673   1
 -13  -2  -4 197.803 55.2958   2
 -13   2   4 289.936 121.076   2
 -13   2   5 1435.73 361.302   2
   0   3   0 2.29656 22.2340   1
   0   3   0 10.3529 11.2991   2
   0  -3   0-16.7710 15.7222   1
   0   3   1 244.847 25.2302   1
   0  -3  -1 191.296 23.1678   1
   0  -3   1 233.092 21.7145   1
   0   3  -3 209.653 15.7282   3
   0   3  -3 243.076 24.1092   1
   0   3   3 269.417 27.8129   1
   0  -3  -3 236.167 24.7527   1
   0  -3   3 212.039 21.8901   1
   0  -3   4 34.9226 19.0742   1
   0   3  -4 34.7938 10.4655   3
   0   3  -4 4.10638 20.1960   1
   0   3   4 45.4606 21.1838   1
   0   3  -4 27.4025 13.2800   2
   0  -3  -4 22.1097 19.0733   1
   0   3  -5 724.973 24.4145   3
   0   3  -5 649.330 26.1767   1
   0   3   5 714.651 35.2223   1
   0  -3  -5 641.526 35.3540   1
   0  -3   5 741.743 32.3825   1
   0   3  -6 49.3479 12.3094   3
   0  -3   6 87.9704 21.9891   1
   0  -3  -7 1.64961 16.6577   1
   0   3  -7 20.4751 11.1898   3
   0   3   7-4.06927 16.6303   1
   0   3  -7 5.84453 14.5955   2
   0  -3  -8 36.1813 25.9982   1
   0   3  -8-6.89012 12.0475   3
   0  -3   8 36.7905 20.0835   1
   0   3   8 36.8830 18.4051   1
   0   3  -8 28.8157 16.7133   2
   0   3  -9 202.019 14.9216   3
   0  -3  -9 207.008 32.1464   1
   0   3   9 240.182 26.5191   1
   0  -3 -10 26.8426 17.4625   1
   0   3  10 26.1150 24.8129   1
   0   3 -10 17.1914 21.5559   2
   0  -3 -11 3.26509 24.2053   1
   0   3  11 1.47204 26.7928   1
   0   3 -11-10.8628 26.9344   2
   0   3  12 143.567 51.3735   1
   0   3 -12 211.074 47.3080   2
   0   3  13 682.421 91.8728   1
   0   3 -13 479.385 81.6298   2
   1   3   0 6.14955 18.4632   1
  -1   3   0-11.2022 15.5840   1
   1   3   0-7.98184 13.4610   2
  -1  -3   0-4.42460 19.2414   1
   1  -3   0-25.0817 15.6162   1
   1   3  -1 67.7182 16.9265   1
  -1  -3  -1 122.958 17.6186   1
   1  -3  -1 127.218 19.6846   1
  -1  -3   1 96.7279 18.6501   1
   1   3  -2 1518.17 41.3905   1
   1   3   2 1973.91 54.0190   1
  -1   3  -2 1659.22 39.7486   1
  -1   3   2 1870.03 49.4874   1
  -1  -3  -2 1636.11 48.0850   1
   1  -3  -2 1662.17 49.1765   1
  -1  -3   2 1904.45 46.4495   1
   1  -3   2 1375.45 34.2564   1
   1   3  -2 1803.01 32.1040   3
  -1   3  -2 1648.39 32.5423   3
  -1   3  -3 730.901 24.5865   3
   1   3  -3 623.140 28.3299   1
   1   3   3 743.712 38.7695   1
  -1   3  -3 673.008 24.9312   1
  -1   3   3 717.328 35.2518   1
  -1  -3  -3 582.006 31.8811   1
   1  -3  -3 626.302 37.0565   1
  -1  -3   3 693.605 29.8434   1
   1  -3   3 740.964 31.2939   1
   1   3  -3 827.239 23.2652   3
   1   3  -4 617.774 21.9926   3
  -1   3  -4 601.449 23.1574   3
   1   3  -4 507.077 27.1366   1
   1   3   4 809.163 46.6358   1
  -1   3  -4 526.050 19.8520   1
  -1   3   4 552.965 30.7381   1
  -1  -3  -4 631.665 39.1640   1
   1  -3  -4 430.927 28.0963   1
  -1  -3   4 656.951 31.9745   1
   1  -3   4 700.897 33.1082   1
   1  -3  -5 28.9242 20.7537   1
  -1  -3  -5-22.0463 18.1836   1
   1   3  -5 5.07881 13.1949   1
  -1   3  -5-4.35221 11.7579   3
   1   3  -5-4.71883 9.75390   3
   1   3   5-6.18798 19.3554   1
  -1   3   5 55.0916 19.3365   1
  -1   3  -5 21.0535 12.9023   2
  -1  -3   5 25.0978 15.4585   1
   1  -3   5-32.3879 18.0734   1
  -1   3  -6 1402.21 33.9955   3
   1   3  -6 1458.82 31.3364   3
   1   3  -6 1119.11 33.6963   1
   1   3   6 1727.52 56.4309   1
  -1   3   6 1514.28 48.6850   1
  -1  -3  -6 1597.72 58.5090   1
   1  -3  -6 1039.01 41.7755   1
  -1  -3   6 1594.80 49.8263   1
   1  -3   6 1687.00 49.7385   1
  -1   3  -7 148.960 15.6226   3
   1   3  -7 145.040 13.4173   3
   1  -3  -7 81.5079 20.7278   1
   1   3   7 170.475 24.1406   1
  -1   3   7 141.756 19.9467   1
  -1  -3   7 91.9348 21.4436   1
   1   3  -7 112.741 18.6085   2
  -1   3  -7 57.9324 15.2148   2
   1  -3   7 186.972 25.6601   1
  -1   3  -8 379.920 19.8450   3
   1   3   8 584.252 37.3445   1
  -1   3   8 422.163 29.1889   1
  -1  -3  -8 610.194 44.1546   1
   1  -3  -8 400.266 38.0527   1
  -1  -3   8 521.788 29.8292   1
  -1   3  -9 185.332 15.6570   3
   1   3   9 246.264 27.4011   1
  -1   3   9 269.493 26.4226   1
  -1  -3   9 329.832 35.3216   1
  -1  -3  -9 203.086 32.9080   1
   1  -3  -9 294.613 37.0151   1
   1   3  10 494.543 42.8559   1
  -1   3  10 412.267 37.0622   1
  -1  -3  10 750.334 64.8278   1
   1  -3 -10 161.311 23.5469   1
   1  -3 -11 30.8935 25.5428   1
  -1  -3 -11 16.8849 24.1547   1
   1   3  11 89.4647 32.8487   1
  -1   3  11 35.1077 27.6965   1
  -1   3 -11-7.72173 26.4598   2
   1   3  12 2524.97 115.601   1
  -1   3  12 2383.51 97.8793   1
   1   3  13 876.411 122.287   1
  -1   3  13 617.454 79.0817   1
  -2   3   0 1678.09 41.8450   1
  -2  -3   0 1733.49 50.3316   1
   2   3   1 90.9492 26.9844   1
  -2   3   1 91.6276 18.5835   1
  -2  -3   1-2.58489 11.1281   1
   2   3  -1 11.3948 12.9513   2
   2  -3   1 60.0393 18.9334   1
  -2  -3  -1 55.7514 18.2473   1
  -2   3  -1 12.4343 11.0765   3
   2   3  -1-4.27540 24.0724   1
   2   3   2 63.6086 16.8582   1
   2   3  -2 63.2086 8.84278   3
  -2   3   2 68.6174 18.7482   1
  -2   3  -2 47.7044 11.9487   1
   2   3  -2 24.2266 12.1941   2
  -2  -3   2 79.6583 16.0823   1
  -2  -3  -2 53.9686 15.8613   1
   2  -3  -2 36.5467 19.6380   1
   2   3  -2 58.1015 22.0291   1
   2  -3  -3-11.2754 20.9574   1
   2   3   3 13.0803 16.5537   1
   2   3  -3 4.52238 9.83987   3
  -2   3  -3 32.5919 12.0712   3
  -2  -3   3 11.0044 17.3899   1
  -2   3   3-12.4221 18.9433   1
   2  -3   3 22.1980 12.8701   1
  -2  -3  -3 8.49538 17.2094   1
   2   3  -3 8.80412 24.5759   1
   2   3  -4 1998.51 32.6882   3
  -2   3  -4 1845.64 39.5891   3
   2   3  -4 2124.73 61.4749   1
   2   3   4 1957.35 54.0081   1
  -2   3   4 1919.54 50.6244   1
   2   3  -4 1387.31 34.8567   2
  -2  -3  -4 2099.34 59.5079   1
   2  -3  -4 1589.53 51.2378   1
  -2  -3   4 2068.12 51.7021   1
   2  -3   4 2050.32 49.3524   1
  -2  -3  -5 8.38992 17.6763   1
   2  -3  -5 11.8241 22.0446   1
   2   3   5 23.2552 16.3951   1
  -2   3  -5 28.0870 11.6479   3
   2   3  -5 40.1661 9.22577   3
   2  -3   5 26.6371 20.8716   1
  -2   3   5 32.0394 16.1351   1
   2   3  -5-8.19980 14.2390   2
  -2   3  -5-14.9905 12.9797   2
  -2  -3   5-10.1644 16.4558   1
   2   3  -5 36.2372 21.1283   1
  -2   3  -6 838.320 28.8628   3
   2   3  -6 1013.74 42.8627   1
   2   3   6 1412.12 57.9524   1
  -2   3   6 1077.87 41.2110   1
  -2  -3  -6 1131.84 50.4519   1
   2  -3  -6 596.823 30.1669   1
  -2  -3   6 1182.37 43.5677   1
   2  -3   6 1193.30 43.2918   1
  -2   3  -7 166.791 17.4538   3
  -2  -3  -7 93.1066 18.2830   1
   2  -3  -7 75.9323 20.9626   1
   2   3   7 153.422 23.7257   1
  -2   3   7 136.337 20.6404   1
   2   3  -7 91.7140 19.8927   2
  -2   3  -7 64.3981 15.1432   2
  -2  -3   7 151.528 18.9923   1
   2   3  -7 157.680 23.6519   1
  -2   3  -8 151.362 15.9402   3
   2   3   8 247.529 29.0689   1
  -2   3   8 212.529 25.1978   1
  -2  -3  -8 221.513 33.8405   1
  -2  -3   8 163.895 21.5542   1
   2  -3  -8 187.516 31.6202   1
  -2  -3   9-28.1836 22.6756   1
  -2   3  -9-3.71609 11.5896   3
  -2  -3  -9 0.26028 24.4018   1
   2  -3  -9-31.0686 28.3618   1
   2   3   9 2.37810 20.5149   1
  -2   3   9 9.07538 18.9849   1
   2   3  -9-7.78359 23.2549   2
  -2   3  -9-4.11352 16.2253   2
  -2   3 -10 560.278 27.7307   3
   2   3  10 914.278 56.5181   1
  -2   3  10 828.130 44.2605   1
  -2  -3  10 1207.00 74.1966   1
  -2  -3 -10 346.656 27.2216   1
   2  -3 -10 447.097 32.2719   1
   2   3  11 683.958 58.6447   1
  -2   3  11 527.952 43.3751   1
   2  -3 -12-15.4696 22.4101   1
   2   3  12 44.6047 46.6781   1
  -2   3  12 0.10116 36.7593   1
   2   3 -12-21.4984 59.2132   2
   2  -3 -13 65.7020 22.6836   1
  -2   3  13 248.041 59.2832   1
  -2   3 -13 203.304 52.3210   2
  -3   3   0-0.84828 12.7043   1
  -3  -3   0-21.9515 18.4904   1
   3  -3   0-15.7764 19.1133   1
   3   3   0 20.1687 23.3831   1
   3   3  -1 350.818 29.9103   1
   3   3   1 397.182 32.4678   1
  -3   3  -1 313.177 16.2171   1
  -3  -3  -1 322.898 24.0933   1
   3  -3   1 340.340 23.5665   1
   3  -3  -1 347.501 26.6063   1
  -3  -3   1 301.288 19.5072   1
  -3   3  -1 343.708 18.9570   3
   3   3  -2 221.142 27.0020   1
   3   3   2 215.481 28.6581   1
  -3   3   2 216.551 20.8003   1
  -3   3  -2 175.685 16.6647   3
   3  -3   2 225.967 25.8149   1
  -3  -3  -2 186.386 19.6087   1
   3  -3  -2 211.991 26.8099   1
  -3  -3   2 172.660 18.8283   1
   3   3  -3 453.069 15.9371   3
  -3   3  -3 492.010 23.5435   3
   3   3  -3 513.965 34.3083   1
   3   3   3 606.659 39.7370   1
  -3   3   3 689.708 32.5523   1
  -3  -3  -3 433.904 29.0005   1
   3  -3  -3 576.797 31.8807   1
  -3  -3   3 507.906 28.7403   1
   3  -3   3 523.680 30.4514   1
  -3   3   4-30.2957 19.4877   1
   3   3  -4-22.5227 14.3928   2
  -3   3  -4-19.3282 13.3991   2
   3   3  -4-26.1482 23.2098   1
  -3  -3   4-26.9808 18.0396   1
  -3  -3  -4-18.7714 17.9041   1
   3   3  -5 151.519 24.8612   1
   3   3   5 135.774 21.1901   1
  -3   3   5 134.741 20.4490   1
  -3  -3  -5 129.733 19.9020   1
   3  -3  -5 120.980 22.5077   1
  -3  -3   5 139.917 19.9684   1
  -3   3  -5 146.090 17.4783   3
  -3   3  -6 288.427 19.6327   3
   3   3  -6 281.246 28.4072   1
   3   3   6 316.265 26.7500   1
  -3   3   6 275.225 24.7571   1
  -3  -3  -6 306.779 30.0830   1
  -3  -3   6 376.581 29.1677   1
  -3   3  -7 359.568 23.6988   3
   3   3  -7 340.236 30.4517   1
  -3   3   7 359.573 27.2931   1
  -3  -3  -7 264.374 24.2474   1
   3  -3  -7 348.042 38.1272   1
  -3  -3   7 389.037 28.6809   1
  -3  -3  -8 4.32856 22.9430   1
  -3   3  -8 13.5917 11.3931   3
   3  -3  -8 6.71392 26.0064   1
   3   3   8 6.88034 21.9438   1
  -3  -3   8 0.73296 14.8971   1
  -3   3   8-24.6873 18.9581   1
   3   3  -8 12.4261 21.6735   2
  -3   3  -8 8.55573 12.9996   2
   3   3  -8-2.35109 21.2058   1
  -3   3  -9 139.973 16.0357   3
  -3  -3  -9 125.006 25.5300   1
   3   3   9 225.214 32.0005   1
  -3   3   9 233.009 26.8577   1
   3   3  -9 85.6058 25.7742   2
  -3   3  -9 82.2809 17.7891   2
  -3  -3   9 227.862 31.0029   1
   3  -3  -9 128.904 30.3196   1
  -3   3 -10 1.52386 12.3229   3
  -3  -3  10-20.0920 41.0951   1
   3  -3 -10-16.7576 26.1554   1
   3   3  10 3.43805 30.0958   1
  -3   3  10 14.4949 21.5774   1
   3   3 -10-25.8857 33.8057   2
  -3   3 -10-7.98792 18.9047   2
   3   3  11 314.384 53.2289   1
  -3   3  11 188.082 31.0516   1
  -3   3 -11 77.9760 23.5257   2
  -3  -3  11 283.168 71.4674   1
   3  -3 -11 157.844 33.8269   1
   3  -3 -12-24.0101 24.5056   1
   3   3  12 13.7074 59.7022   1
  -3   3 -12-3.02682 29.1098   2
  -3   3  12 20.2258 33.3419   1
  -3  -3  12 100.014 95.6378   1
   3  -3 -13 11.7460 21.2825   1
   3   3  13 210.346 143.960   1
   4   3   0 2664.73 66.3678   1
  -4   3   0 2747.93 41.6829   1
  -4  -3   0 2782.77 62.0075   1
   4  -3   0 2756.17 65.4510   1
  -4   3   0 2653.41 48.7364   3
   4   3  -1 629.988 35.9103   1
   4   3   1 720.625 38.5536   1
  -4   3   1 951.566 29.0346   1
  -4  -3  -1 747.317 33.9415   1
   4  -3   1 824.045 36.9219   1
   4  -3  -1 1161.05 47.3456   1
  -4  -3   1 565.166 24.6579   1
  -4   3  -1 888.589 32.9897   3
  -4   3  -2 179.967 17.2800   3
   4   3  -2 193.575 25.9609   1
  -4   3   2 180.273 17.3892   1
   4  -3   2 209.535 24.9161   1
  -4  -3  -2 151.524 19.4265   1
  -4  -3   2 168.157 19.1793   1
   4   3  -3 195.186 26.4028   1
   4   3   3 260.644 28.4795   1
  -4   3  -3 231.607 18.3687   3
  -4   3   3 219.301 19.8699   1
   4  -3   3 230.674 25.1392   1
  -4  -3  -3 222.960 22.5930   1
   4  -3  -3 304.979 28.2132   1
  -4  -3   3 241.075 23.0032   1
  -4   3  -4 2337.25 49.4887   3
   4   3  -4 2254.61 66.5794   1
  -4   3   4 2264.61 53.1714   1
   4  -3  -4 2421.64 75.4738   1
  -4  -3   4 2221.90 55.5213   1
  -4  -3  -5 41.4398 16.9656   1
   4   3   5 48.9096 17.0052   1
   4  -3  -5 3.80289 16.7204   1
  -4   3  -5 41.7966 13.3124   3
  -4   3   5 45.0609 17.3840   1
  -4   3  -5 31.0695 12.3875   2
  -4  -3   5 57.6551 16.5951   1
   4   3  -5 76.0316 25.8075   1
  -4   3  -6 778.643 31.2554   3
   4   3  -6 748.554 45.5777   1
   4   3   6 878.479 37.6026   1
  -4   3   6 847.280 36.4510   1
   4  -3  -6 723.486 43.8841   1
  -4  -3   6 770.720 37.1600   1
   4   3   7 44.4701 20.1812   1
  -4  -3  -7-18.6035 18.1646   1
   4  -3  -7 20.2322 27.4620   1
  -4   3  -7 19.3035 14.3885   3
  -4  -3   7-6.34885 17.2499   1
  -4   3   7 2.75771 16.7829   1
  -4   3  -7 2.79939 12.6885   2
   4   3  -7-10.0051 22.8898   1
   4   3  -8 315.582 29.2642   1
  -4   3  -8 349.801 21.8423   3
  -4   3   8 442.280 31.1034   1
  -4  -3  -8 476.692 34.4367   1
  -4  -3   8 317.443 25.9039   1
   4  -3  -8 430.886 44.7384   1
  -4   3  -9 0.03202 11.1687   3
  -4  -3   9 4.60982 18.0652   1
   4   3   9-29.7144 28.9856   1
   4  -3  -9 48.0377 25.7944   1
  -4   3  -9 4.40740 15.3280   2
  -4   3   9 3.62170 21.1005   1
   4   3  -9-19.9133 22.2556   1
  -4   3 -10 589.544 27.5295   3
  -4   3  10 856.745 45.5220   1
  -4  -3  10 968.224 61.1461   1
   4  -3 -10 646.880 50.6978   1
  -4  -3  11-102.569 66.2170   1
   4  -3 -11 41.8836 28.6160   1
   4   3  11-69.9597 55.6856   1
  -4   3 -11 31.8280 21.9881   2
  -4   3  11 3.24278 27.3412   1
   4  -3 -12-2.98024 25.0070   1
   4   3  12 51.8072 88.7227   1
  -4   3 -12-4.78167 26.3246   2
  -4   3  12 4.81828 30.3920   1
  -4  -3  12-41.8139 115.098   1
   4   3  13 1632.87 476.958   1
  -5   3   0-12.3219 9.89431   3
  -5  -3   0-10.2069 16.7555   1
   5   3   0 1.93050 19.6087   1
   5  -3   0 0.05744 20.3792   1
  -5   3   1-5.19444 12.1150   3
  -5   3  -1 1.48216 11.4013   3
   5  -3  -1 20.1065 24.4693   1
  -5  -3   1 4.46520 11.3060   1
   5   3  -1-27.0737 24.8674   1
   5   3   1 1.79713 18.4620   1
  -5  -3  -1 24.0999 15.4723   1
  -5   3  -2 1354.11 37.6897   3
   5   3  -2 1430.74 59.1583   1
   5   3   2 1366.31 49.9206   1
  -5   3   2 1478.73 36.4764   1
   5  -3   2 1449.59 48.9276   1
  -5  -3  -2 1183.23 39.4771   1
   5  -3  -2 1525.79 56.0961   1
  -5  -3   2 1234.26 39.5433   1
  -5   3  -3-22.3217 15.8813   3
  -5  -3   3-16.3236 16.2519   1
  -5   3   3-14.2425 16.4504   1
   5   3  -3-7.32926 27.5250   1
   5   3   3-17.2699 22.3439   1
  -5  -3  -3 19.5911 16.5902   1
  -5  -3  -4-4.36510 17.0470   1
   5  -3  -4 3.89686 15.8948   1
  -5   3  -4 19.0159 12.0785   3
  -5   3   4 1.79047 15.2168   1
   5   3  -4-16.3333 25.2034   1
   5   3   4 29.1219 19.9277   1
  -5  -3   4-1.65896 16.7270   1
   5   3  -5 285.878 37.4622   1
   5   3   5 228.631 30.2387   1
  -5   3  -5 139.005 17.4085   3
  -5   3   5 207.425 22.2728   1
  -5  -3  -5 176.877 21.6786   1
  -5  -3   5 69.0054 16.3074   1
   5   3  -6 329.079 43.7333   1
  -5   3  -6 263.791 22.2874   3
   5   3   6 432.743 38.9860   1
  -5  -3  -6 466.412 23.3635   2
  -5   3   6 310.256 26.3221   1
  -5  -3  -6 253.827 22.1894   1
   5  -3  -6 301.155 40.6045   1
  -5  -3   6 165.526 22.8198   1
  -5   3  -7 84.4225 15.7634   3
   5   3   7 84.3587 21.7562   1
   5  -3  -7 149.446 33.1288   1
  -5  -3  -7 197.295 19.8470   2
  -5   3   7 130.125 21.9263   1
  -5   3  -7 48.3300 13.6903   2
  -5  -3  -7 130.703 21.4927   1
  -5  -3   7 105.331 20.6854   1
   5   3  -7 137.011 34.5463   1
  -5   3  -8 89.2288 14.8926   3
   5   3   8 137.082 29.8874   1
   5  -3  -8 81.9312 29.0703   1
  -5  -3   8 77.5201 19.6183   1
  -5   3  -8 47.0484 14.6437   2
  -5   3   8 99.4448 20.3496   1
   5   3  -8 113.032 32.4236   1
   5   3  -9 564.003 43.9624   1
  -5   3  -9 345.349 22.1752   3
   5   3   9 945.573 66.5587   1
  -5  -3  -9 1137.42 44.5197   2
  -5   3   9 532.795 33.8263   1
  -5  -3   9 353.764 32.8404   1
   5  -3  -9 434.387 39.7262   1
  -5   3 -10 88.8095 16.3932   3
  -5  -3  10 131.418 36.9874   1
   5   3  10 272.978 56.6291   1
  -5  -3 -10 350.973 39.0040   2
  -5   3 -10 28.4448 18.8654   2
  -5   3  10 85.9411 23.0287   1
   5  -3 -10 160.264 42.7905   1
  -5  -3  11 21.8638 51.3154   1
   5   3  11 84.0527 76.6606   1
   5  -3 -11 37.6439 32.0560   1
  -5   3 -11-2.27594 20.2370   2
  -5   3  11 23.7166 23.6689   1
  -6   3   0 372.284 23.1283   3
   6   3   0 363.554 35.3611   1
  -6  -3   0 308.415 25.4396   1
   6  -3  -1 63.2054 27.1953   1
  -6   3   1 9.73138 11.4281   3
  -6   3  -1 32.4965 13.4304   3
  -6  -3   1 10.4982 15.0175   1
   6   3  -1-1.91141 25.3249   1
   6   3   1 3.22923 23.1357   1
  -6  -3  -1-5.55414 13.6915   1
  -6   3  -2 112.559 15.5319   3
   6   3  -2 125.064 28.5285   1
   6  -3  -2 170.198 33.9374   1
   6   3   2 118.171 22.0427   1
  -6  -3   2 93.6529 16.5255   1
  -6  -3  -2 53.5914 16.0358   1
  -6   3   2 82.6055 15.2218   3
   6   3   3 124.269 22.5474   1
  -6   3  -3 79.3396 14.7511   3
  -6   3   3 103.070 15.1924   1
  -6  -3   3 76.1852 16.1438   1
  -6  -3  -3 107.250 18.9588   1
   6  -3  -3 112.963 28.4985   1
   6   3  -3 75.0367 26.5645   1
  -6   3  -4 160.806 17.8724   3
   6   3   4 281.108 29.7335   1
  -6  -3   4 147.686 21.2951   1
  -6   3   4 281.628 21.3946   1
  -6  -3  -4 198.608 23.6351   1
   6  -3  -4 354.720 36.4964   1
   6   3  -5 598.565 47.0058   1
  -6   3  -5 455.433 25.2594   3
   6   3   5 772.360 46.1535   1
  -6  -3  -5 750.549 26.2798   2
  -6   3   5 709.699 33.6221   1
  -6  -3  -5 530.843 31.0909   1
   6  -3  -5 819.485 60.0347   1
  -6  -3   5 444.951 28.1579   1
  -6  -3  -6 3.99912 12.0525   1
  -6   3  -6 12.7744 15.2214   3
   6  -3  -6 44.3442 36.0357   1
  -6  -3  -6 8.07574 13.9977   2
  -6  -3   6-3.91049 15.7935   1
  -6   3   6 5.44565 18.3247   1
   6   3  -6 2.98148 25.9031   1
   6   3   6 49.6623 28.4066   1
  -6   3  -7 179.487 19.1791   3
   6   3   7 330.567 36.4411   1
  -6  -3  -7 315.942 23.4954   2
  -6   3   7 266.762 26.8890   1
   6  -3  -7 266.157 46.7950   1
  -6  -3   7 171.048 25.9748   1
   6   3  -8 208.557 33.9663   1
  -6   3  -8 97.3339 13.7116   3
   6   3   8 244.364 36.3253   1
   6  -3  -8 198.676 37.5783   1
  -6  -3  -8 356.863 28.0551   2
  -6   3   8 291.408 28.8394   1
  -6   3  -8 112.039 16.1371   2
  -6  -3   8 184.845 29.7662   1
   6   3  -9 342.769 41.0072   1
  -6   3  -9 249.707 22.1301   3
  -6   3   9 347.083 29.9627   1
  -6  -3   9 316.831 35.2770   1
   6   3  10 154.925 74.9252   1
   6  -3 -10 54.5899 42.2966   1
  -6  -3  10 45.8945 28.5657   1
  -6   3 -10 28.6905 17.4157   2
  -6   3  10 66.2582 21.3534   1
   6   3 -10 75.7023 27.5194   1
  -6  -3  11 120.002 49.2283   1
   6   3  11 696.078 152.400   1
   6  -3 -11 106.816 46.4707   1
  -6  -3 -11 705.913 96.4478   2
  -6   3 -11 30.7999 17.8939   2
  -6   3  11 99.8549 22.8905   1
  -6  -3 -12 1134.34 463.710   2
  -7   3   0 4.42713 14.7240   3
   7   3   0-20.7358 27.0074   1
  -7  -3   0-1.14977 19.5796   1
  -7   3   1 271.295 23.1905   3
  -7   3  -1 271.532 21.9120   3
   7   3  -1 262.920 33.4841   1
  -7  -3  -1 207.900 20.9512   1
  -7  -3   1 237.060 23.4421   1
  -7   3  -2 571.077 29.5224   3
   7   3  -2 597.730 42.4955   1
   7   3   2 668.522 44.6055   1
  -7  -3  -2 524.319 30.4785   1
   7  -3  -2 676.983 43.6784   1
  -7   3   2 543.658 27.0734   3
  -7   3  -3 623.351 31.3257   3
   7   3  -3 614.851 41.6749   1
   7   3   3 691.289 40.5744   1
  -7  -3  -3 497.590 29.5775   1
   7  -3  -3 776.910 56.2358   1
  -7  -3   3 525.963 29.1931   1
  -7   3   3 621.611 30.8879   3
   7   3  -4 294.905 34.4573   1
  -7   3  -4 219.629 21.0697   3
   7   3  -5 182.963 30.0670   1
  -7   3  -5 143.401 19.0120   3
   7   3   5 299.574 36.6779   1
   7  -3  -5 197.547 44.7246   1
  -7  -3  -5 275.954 20.2678   2
  -7   3   5 203.224 20.0774   1
   7   3  -6 644.396 45.5806   1
  -7   3  -6 568.883 33.3369   3
   7   3   6 1167.49 67.3976   1
  -7  -3  -6 1022.23 34.0848   2
  -7   3   6 560.233 29.9258   1
   7  -3  -6 984.012 78.2725   1
   7   3   7 92.3226 46.0019   1
  -7   3  -7 17.9880 15.5479   3
   7  -3  -7-16.3419 36.6849   1
  -7  -3  -7 62.8174 19.5861   2
  -7  -3   7-9.00488 23.0564   1
   7   3  -7 25.0658 26.8423   1
  -7   3   7 9.87491 16.7368   1
   7   3  -8 891.977 53.7617   1
  -7   3  -8 742.757 31.2202   3
   7   3   8 2557.05 109.159   1
  -7  -3  -8 2878.00 68.4715   2
  -7   3   8 1045.87 40.5621   1
   7  -3  -8 1649.88 98.8063   1
  -7  -3   8 1306.77 66.2901   1
  -7   3  -9 98.1059 19.1772   3
   7  -3  -9 102.613 56.2364   1
  -7  -3   9 51.6383 30.5253   1
   7   3  -9 54.1363 26.5659   1
  -7   3   9 74.3183 17.5659   1
   7   3 -10 251.742 34.3372   1
  -7   3  10 326.209 26.2304   1
  -7  -3  10 413.672 49.9835   1
   7  -3 -10 489.344 75.3039   1
  -7  -3 -11-19.1212 158.834   2
  -8   3   0 646.467 34.0921   3
   8   3   0 601.401 45.8420   1
  -8   3  -1 98.8666 20.3146   3
  -8   3   1 50.8345 18.1933   3
   8   3  -1 46.8268 27.0372   1
   8   3   1 72.7750 33.9747   1
  -8  -3   1 24.4249 18.0395   1
  -8  -3  -1 41.0016 16.4942   1
   8  -3  -2 49.0342 42.0423   1
  -8   3   2 18.4951 16.9141   3
  -8   3  -2-10.0406 16.3914   3
  -8  -3   2 2.84387 11.0629   1
   8   3  -2 0.81165 22.6128   1
   8   3   2 15.0364 29.1918   1
  -8  -3  -2-19.0915 17.8155   1
  -8  -3  -3 9.56214 18.1153   1
  -8   3   3 24.8830 19.1192   3
   8  -3  -3 44.9241 57.1902   1
  -8   3  -3 8.34510 16.6732   3
   8   3  -3 2.49665 24.6671   1
  -8  -3   3-0.91093 14.8395   1
   8   3   3-30.9084 29.6145   1
  -8   3  -4 205.920 23.9516   3
   8   3   4 173.687 32.4199   1
  -8   3   4 267.378 28.2214   3
   8   3   5 146.606 39.2334   1
  -8   3  -5 50.4125 19.4356   3
   8  -3  -5 95.7863 60.6853   1
   8   3  -5 83.7220 34.2363   1
  -8  -3   5 88.8140 24.9121   1
  -8   3   5 68.6514 24.8931   3
   8   3  -6 312.273 44.2539   1
  -8   3  -6 199.923 24.2035   3
   8   3   6 435.981 57.9534   1
  -8  -3  -6 378.159 27.6918   2
   8  -3  -6 292.097 64.5875   1
  -8   3  -7 131.645 22.8616   3
  -8  -3  -7 344.276 32.1370   2
   8  -3  -7 300.292 58.0701   1
   8   3  -7 117.938 31.0430   1
   8   3   8-51.9538 85.8188   1
  -8   3  -8-4.47523 18.3708   3
   8  -3  -8 14.4219 71.4011   1
  -8  -3  -8 1.19306 32.9942   2
  -8  -3   8-6.76677 26.0493   1
   8   3  -8 8.23398 23.2663   1
  -8   3   8 11.1300 16.9518   1
  -8   3  -9 36.1899 21.8869   3
   8  -3  -9 201.287 81.4018   1
  -8  -3  -9 264.764 57.9338   2
  -8  -3   9 44.7809 36.3746   1
   8   3  -9-11.3478 21.0900   1
  -8   3   9 61.8654 19.5449   1
  -8   3  10 123.393 19.3531   1
  -9   3   0 9.26070 20.4081   3
   9   3   0-7.71374 32.5663   1
  -9  -3   0 4.91550 13.8287   1
  -9   3  -1 57.3426 24.3093   3
   9   3  -1 15.1965 29.3753   1
   9   3   1 60.6083 35.4270   1
  -9  -3   1 0.33779 19.4819   1
  -9  -3  -1 9.08905 14.9358   1
  -9   3   2 806.299 47.9720   3
  -9   3  -2 710.334 42.2895   3
   9   3   2 825.381 69.7312   1
  -9   3   3-1.75213 25.0646   3
  -9   3  -3 1.85390 20.6468   3
   9  -3  -3 26.2927 86.4720   1
  -9  -3   3-14.9643 12.9157   1
   9   3  -3-16.6444 35.4225   1
   9   3   3 33.7963 41.6234   1
  -9   3   4 26.2788 28.2856   3
  -9   3  -4 15.2001 24.1353   3
   9  -3  -4-17.4957 87.5144   1
  -9  -3   4 9.13634 14.5200   1
   9   3  -4 42.2221 38.3453   1
   9   3   4-10.4818 40.0764   1
  -9   3  -5 80.7908 25.5755   3
   9  -3  -5 64.3875 74.0958   1
  -9  -3   5 76.0889 18.5466   1
   9   3   5 65.7530 50.7586   1
   9   3  -6 553.071 57.1105   1
  -9   3  -6 428.106 34.6483   3
   9   3   6 1147.00 105.646   1
  -9  -3  -6 937.243 47.9483   2
   9  -3  -6 656.684 85.8035   1
  -9  -3   6 530.282 38.5900   1
  -9   3   6 941.840 72.7921   3
  -9   3  -7 134.550 24.6151   3
   9  -3  -7 452.401 115.282   1
  -9  -3  -7 402.208 47.0838   2
   9   3  -7 133.583 39.3618   1
  -9  -3   7 110.611 26.6971   1
   9   3   7 584.241 114.955   1
  -9   3   7 475.054 74.7284   3
  -9   3  -8 38.5442 27.3211   3
   9  -3  -8-65.1705 139.793   1
   9   3  -8-10.2263 31.9464   1
  -9  -3   8 41.7801 24.0302   1
  -9  -3  -9 6175.42 302.140   2
  10   3   0 1476.59 92.4529   1
 -10   3   0 1896.93 86.5708   3
  10   3  -1 1006.51 76.0040   1
 -10   3   1 1482.65 78.9361   3
  10   3   1 1327.54 96.5908   1
 -10   3  -1 1184.01 72.4460   3
 -10   3   2 181.493 45.4835   3
  10   3  -2 111.513 53.0773   1
  10   3   2 201.590 71.8229   1
 -10  -3   2 75.4172 18.2525   1
 -10   3   3 1138.12 77.1963   3
  10   3  -3 953.518 84.5466   1
 -10   3  -3 1019.50 67.2990   3
 -10   3   4 649.970 73.7945   3
  10   3  -4 405.238 59.7630   1
 -10   3  -4 396.697 45.8857   3
  10   3   4 652.642 92.9772   1
  10  -3  -4 543.102 138.933   1
 -10   3   5 899.293 94.3066   3
  10   3  -5 413.510 57.9014   1
 -10   3  -5 310.536 45.2244   3
  10   3   5 570.888 114.441   1
 -10  -3  -5 979.465 69.8560   2
  10  -3  -5 872.866 186.609   1
 -10  -3   5 190.677 19.8385   1
 -10   3   6 3235.84 207.921   3
  10   3  -6 784.938 68.1733   1
 -10   3  -6 643.539 48.6115   3
 -10  -3  -6 2335.95 109.950   2
  10  -3  -6 3230.57 316.509   1
  10  -3  -7 653.793 325.443   1
 -11   3   0 79.9735 69.8064   3
  11   3   0 52.6147 86.2615   1
 -11   3   1 62.4120 73.6807   3
 -11   3  -1-0.73527 58.9393   3
  11   3  -1 86.3606 74.0043   1
  11   3   1 115.739 94.9128   1
 -11   3   2 301.786 95.1262   3
 -11   3  -2 312.171 77.0462   3
  11   3  -2 266.213 92.2162   1
  11   3   2 461.269 152.101   1
 -11   3   3 175.128 115.961   3
 -11   3  -3 24.4233 68.0129   3
  11   3  -3 47.4755 76.4666   1
  11   3   3 57.6253 157.734   1
 -11  -3   3 8.20939 15.0226   1
 -11   3   4 392.281 198.433   3
 -11   3  -4 16.8231 68.6720   3
 -11  -3   4 17.6856 14.7868   1
  11   3   4 17.4238 268.131   1
   0   4   0 5145.53 92.8818   1
   0  -4   0 4949.80 102.190   1
   0   4  -1-2.70550 14.2227   3
   0   4   1-11.8612 30.4228   1
   0  -4  -1 56.6400 31.3534   1
   0   4  -2 12.2308 12.3396   3
   0   4  -2 16.7670 18.9896   1
   0   4   2 18.8017 22.2717   1
   0  -4   2 22.3770 29.0851   1
   0  -4  -2-34.6682 27.7822   1
   0  -4  -3-19.0111 27.3040   1
   0   4  -3-0.47814 13.2103   3
   0   4   3-32.8998 26.7648   1
   0  -4   3-37.4450 34.3880   1
   0   4  -4 1615.36 42.7632   3
   0   4   4 1676.74 57.7653   1
   0  -4  -5-18.8861 29.1425   1
   0   4  -5-2.01301 13.2248   3
   0   4   5 42.6737 21.7141   1
   0  -4   5-56.0044 35.8250   1
   0  -4  -6 32.9170 25.4900   1
   0   4   6 120.934 29.7193   1
   0   4  -6 80.9448 41.3666   2
   0  -4   6 51.9233 58.8674   1
   0  -4  -7-18.5416 24.7217   1
   0   4   7-4.97960 25.6531   1
   0   4  -7-13.1921 45.7413   2
   0  -4   7 21.4987 65.7771   1
   0  -4  -8 199.302 35.1805   1
   0   4   8 327.893 40.4913   1
   0  -4  -9 19.3118 24.9896   1
   0   4   9 68.2915 32.7228   1
   1   4   0-33.8143 31.7638   1
  -1   4  -1-8.39744 13.9476   3
   1   4  -1 64.2579 30.3117   1
   1   4   1-13.8374 26.6445   1
  -1   4   1 9.10082 23.4994   1
  -1   4  -1-0.15685 17.7387   1
  -1  -4   1 50.8831 32.5595   1
   1  -4   1-45.2550 33.4983   1
  -1  -4  -1 7.01587 24.3685   1
   1  -4  -1 25.0021 28.4920   1
   1   4  -1 28.1111 15.2535   3
   1   4  -2 48.9374 12.9909   3
  -1   4  -2 42.4234 13.7285   3
   1   4  -2 62.8315 23.4146   1
   1   4   2 50.2955 26.5952   1
  -1   4   2 59.0296 24.2809   1
  -1  -4   2 26.8132 30.8322   1
   1  -4   2 34.9745 30.6111   1
  -1  -4  -2 17.8483 25.9223   1
   1  -4  -2 54.5887 29.0493   1
   1  -4  -3 40.2130 28.4840   1
   1   4  -3 3.70238 12.1269   3
  -1   4  -3-13.5632 13.3229   3
   1   4  -3 38.6326 23.5673   1
   1   4   3-33.6786 25.0953   1
  -1   4   3-31.7544 21.4511   1
  -1   4  -3 34.7682 27.5426   2
  -1  -4   3 10.7618 30.6724   1
   1  -4   3-50.2579 45.3909   1
  -1  -4  -3 43.4751 27.2751   1
   1   4   4 103.043 26.7310   1
   1  -4  -4 138.283 34.5855   1
  -1  -4  -5 38.8631 26.6364   1
   1  -4  -5 63.2924 33.6223   1
  -1   4  -5 56.5097 14.8379   3
   1   4   5 62.5358 26.2876   1
  -1   4   5 61.0975 19.7756   1
  -1  -4   5 105.021 33.5307   1
  -1   4  -5 52.0615 30.9137   2
   1  -4   5 49.6810 48.5998   1
  -1   4  -6 88.3318 16.6003   3
   1  -4  -6 120.424 24.7416   1
  -1   4   6 132.584 25.0738   1
   1   4   6 144.199 31.8358   1
  -1   4  -6 72.2537 40.4844   2
  -1  -4  -6 81.8748 26.5696   1
  -1  -4   6 109.863 50.4308   1
  -1   4  -7 59.1194 14.9826   3
  -1  -4  -7 2.22436 18.9972   1
   1  -4  -7 24.8154 28.2557   1
   1   4   7 71.6309 27.6364   1
  -1   4   7 66.9546 25.3602   1
  -1   4  -7 8.09549 44.2734   2
   1   4   8 595.398 53.2297   1
  -1   4   8 561.053 43.7088   1
  -1  -4  -9 10.7783 23.5545   1
   1  -4  -9 34.8483 30.5495   1
   1   4   9 3.21517 38.6576   1
  -1   4   9 18.7248 30.6672   1
   2   4   0 227.728 31.1868   1
  -2   4   0 187.109 22.4828   1
  -2  -4   0 239.329 33.1682   1
   2  -4   0 147.836 36.2482   1
  -2   4   0 175.166 19.7193   3
   2   4  -1 0.27671 10.3245   3
   2   4  -1-4.06039 24.8648   1
   2   4   1 1.40542 31.6405   1
  -2   4   1-17.8417 18.8223   1
  -2  -4   1 4.70437 25.5762   1
   2  -4   1-29.5874 32.7438   1
  -2  -4  -1-16.2574 21.3680   1
   2  -4  -1-5.64343 32.9647   1
   2  -4  -2 45.2997 37.3080   1
   2   4   2 102.561 33.6503   1
  -2   4   2 90.4776 21.8780   1
  -2  -4   2 37.8270 31.2923   1
   2  -4   2 98.5737 37.4760   1
  -2  -4  -2 48.4234 25.3384   1
   2  -4  -3 20.1403 28.2569   1
  -2  -4   3-39.6081 33.0307   1
   2   4  -3 17.6987 24.8724   1
   2   4   3 88.7368 29.5965   1
  -2   4   3 52.8643 23.2520   1
   2  -4   3 78.9978 48.5439   1
  -2  -4  -3 65.6616 28.8609   1
  -2  -4   4 64.6644 23.1483   1
  -2  -4  -4 31.2751 23.1225   1
   2  -4  -4 26.9120 33.5199   1
  -2   4  -4 54.5874 14.6948   3
   2   4  -4 87.5864 24.4109   1
   2   4   4 43.1959 25.7015   1
  -2   4   4 62.1337 23.2240   1
  -2   4  -4 69.6152 30.5075   2
   2  -4   4 75.8595 52.0331   1
  -2   4  -5 78.1398 15.6711   3
  -2  -4  -5 61.4773 24.7961   1
   2  -4  -5 83.5924 40.4082   1
  -2  -4   5 43.5648 33.8130   1
   2   4   5 69.4350 28.3915   1
  -2   4   5 20.2234 21.2789   1
  -2   4  -5-24.8885 33.4422   2
  -2   4  -6 580.389 28.0661   3
  -2  -4  -6 597.786 48.3604   1
   2  -4  -6 535.478 41.8860   1
  -2  -4  -7 24.6677 17.5346   1
   2  -4  -7 82.7840 37.0913   1
  -2   4  -7 55.4957 15.1378   3
   2   4   7 76.4517 33.8300   1
  -2  -4   7 93.8306 57.5894   1
  -2   4   7 64.1508 23.0763   1
  -2   4  -8 122.392 16.6073   3
   2  -4  -8 143.064 44.4678   1
  -2   4   8 154.276 26.1467   1
  -2   4  -8 45.9378 60.2153   2
  -2  -4  -8 126.134 28.2649   1
  -2  -4  -9 68.8697 24.0949   1
  -2   4  -9 387.941 103.358   2
   3   4   0-6.66259 23.2973   1
  -3   4   0 17.7098 13.8403   3
  -3  -4   0 30.9323 24.5212   1
   3  -4   0-39.3579 41.4814   1
  -3   4  -1 75.1434 17.9175   3
   3   4  -1 38.1560 21.7907   1
   3   4   1 73.0573 23.8192   1
  -3  -4   1 7.92730 27.6264   1
  -3  -4  -1 67.0843 23.7647   1
   3  -4   1 119.835 44.8706   1
   3  -4  -1 125.095 44.1456   1
  -3   4  -2 1664.70 47.9269   3
   3   4  -2 1392.13 52.2750   1
   3   4   2 1766.46 62.7399   1
  -3   4   2 1638.69 46.6738   1
  -3  -4   2 2022.25 75.7797   1
   3  -4   2 2619.21 101.737   1
  -3  -4  -2 1424.32 61.0785   1
   3  -4  -2 2166.51 91.0829   1
  -3   4  -3 5.67500 16.9101   3
   3  -4  -3-58.9407 40.3248   1
   3   4  -3-8.99797 20.8128   1
  -3  -4   3 17.2082 32.7464   1
   3  -4   3-92.0384 59.7460   1
  -3  -4  -3-37.6072 25.9561   1
  -3  -4  -4-23.0318 24.3176   1
   3  -4  -4 97.4058 44.6011   1
   3   4  -4-0.10544 19.4986   1
  -3   4  -4 6.67616 15.1064   3
   3   4   4 95.8000 38.1449   1
  -3   4   4 3.80773 17.6665   1
  -3  -4   4-19.6481 24.2601   1
   3  -4  -5 76.5661 35.1355   1
  -3   4  -5 42.4986 14.3428   3
   3   4  -5 81.2106 21.9960   1
   3   4   5 94.4587 31.9306   1
  -3   4   5 56.3479 20.4290   1
  -3   4  -5-40.3268 35.8491   2
  -3  -4  -5 64.6254 25.1688   1
  -3  -4   5 72.0826 34.8453   1
  -3   4  -6 667.777 30.9313   3
   3   4   6 1268.95 71.9581   1
  -3   4   6 744.975 35.7152   1
  -3  -4  -6 597.659 43.4997   1
   3  -4  -6 955.606 62.6831   1
  -3  -4   6 1592.59 88.3706   1
  -3  -4  -7 4.42247 15.5894   1
   3  -4  -7-1.56400 52.8432   1
  -3   4  -7-1.89021 14.8056   3
   3   4   7 14.1533 41.7921   1
  -3   4   7 14.0630 17.5872   1
  -3   4  -7-61.0149 44.1652   2
  -3   4  -8 232.059 18.6914   3
  -3   4   8 258.148 26.2826   1
  -3   4  -9 12.6974 11.1088   3
  -3  -4  -9 14.3089 22.0000   1
  -3  -4   9 148.113 206.457   1
   4   4   0-12.1314 22.5910   1
  -4   4   0 1.52135 17.5500   3
  -4  -4   0 13.4457 23.8206   1
   4  -4  -1 95.1705 55.1500   1
   4   4  -1 38.7358 23.0232   1
   4   4   1 14.6774 22.7628   1
  -4   4   1 36.9481 17.3098   3
  -4   4  -1 30.9979 15.5999   3
  -4  -4   1 33.2473 25.9195   1
  -4  -4  -1 37.7499 20.8388   1
   4  -4   1 35.3579 49.7796   1
  -4   4  -2 234.297 23.1631   3
   4  -4  -2 200.055 42.5802   1
   4   4  -2 164.478 27.5933   1
   4   4   2 261.772 32.4633   1
  -4  -4   2 228.960 33.5109   1
  -4  -4  -2 184.438 27.4142   1
  -4   4   2 282.327 26.2109   3
   4   4  -3-16.3114 28.5395   1
   4   4   3 7.60417 24.1501   1
  -4   4  -3-4.46523 16.1061   3
  -4  -4   3-13.7991 26.4418   1
  -4  -4  -3 8.51174 21.7434   1
  -4  -4  -4-7.72877 19.8543   1
   4   4  -4 2.24511 27.6765   1
   4  -4  -4-18.6544 52.9553   1
   4   4   4 28.7701 27.6964   1
  -4   4  -4 26.8829 15.7686   3
  -4   4   4 8.23607 17.8958   1
  -4  -4   4 4.33390 22.3570   1
   4   4  -5 15.8155 22.3433   1
  -4  -4   5-1.22683 34.1738   1
  -4  -4  -5-10.6055 21.6417   1
   4  -4  -5 74.4641 36.4052   1
  -4   4  -5 7.37040 14.2774   3
   4   4   5 79.2601 41.7156   1
  -4   4   5 54.3938 20.7316   1
  -4   4  -6 208.278 20.0607   3
   4   4  -6 214.562 26.5807   1
   4   4   6 420.224 61.0159   1
  -4   4   6 273.394 26.2472   1
  -4  -4  -6 144.727 21.8755   1
   4  -4  -6 337.134 63.9674   1
  -4  -4   6 357.430 54.5391   1
  -4  -4  -7-3.90854 17.2302   1
   4  -4  -7 90.6376 66.5184   1
  -4   4  -7 8.16959 14.6068   3
   4   4   7 67.9800 49.7581   1
  -4  -4   7 64.1237 66.3389   1
  -4   4  -7 82.1464 47.0695   2
  -4   4   7 12.0329 17.8185   1
  -4  -4  -8 39.0079 21.5863   1
  -4   4  -8-1.54536 11.8118   3
   4   4   8 71.0123 65.3060   1
  -4  -4   8 85.0435 114.045   1
  -4   4  -8 25.3017 60.4496   2
  -4   4   8 10.6752 17.2231   1
   5   4   0-15.1399 35.8167   1
   5  -4   0 43.6000 74.8046   1
  -5   4   0-3.40559 19.1956   3
  -5  -4   0-14.8333 23.3979   1
   5  -4  -1 69.8156 52.9203   1
   5   4   1 112.599 39.0786   1
  -5   4  -1 81.2586 20.5264   3
  -5  -4   1 74.9581 23.4282   1
  -5  -4  -1 43.2396 20.2726   1
   5   4  -1 90.3880 31.4847   1
  -5   4  -2 248.971 24.1253   3
   5   4  -2 280.440 39.8058   1
   5   4   2 224.119 35.4847   1
  -5   4   2 293.799 28.3176   3
   5  -4  -3 13.0288 68.0859   1
   5   4   3-32.5397 27.0013   1
  -5   4   3-6.18027 21.6966   3
  -5   4  -3-25.8431 20.4232   3
  -5  -4   3-10.4116 27.8060   1
   5   4  -3 18.1936 28.5753   1
  -5  -4  -3 7.24810 19.5273   1
  -5  -4  -4 95.2869 18.1884   1
  -5   4  -4 191.535 23.3546   3
   5   4  -4 212.487 32.8274   1
   5   4   4 284.386 41.3676   1
   5  -4  -4 302.116 56.1680   1
  -5  -4   4 165.899 28.2722   1
  -5  -4  -5 25.8959 19.3800   1
   5   4   5 19.9143 36.4377   1
  -5   4  -5 25.8410 15.5738   3
  -5  -4   5 54.2506 29.5491   1
   5   4  -5 52.2535 26.8426   1
  -5   4  -6 138.586 21.3341   3
  -5   4   6 144.536 20.1299   1
  -5   4  -7-1.06579 13.0176   3
   5  -4  -7 22.7963 85.8283   1
   5   4   7-97.7324 87.5386   1
  -5  -4   7-19.6310 60.2060   1
  -5   4   7 6.93955 18.3026   1
  -6   4   0 2497.98 74.3124   3
   6   4   0 1985.68 86.1596   1
  -6  -4   1 69.6991 22.2413   1
  -6  -4  -1 63.5063 19.5390   1
   6   4  -1 144.577 39.2342   1
   6   4   1 99.3270 45.4621   1
   6   4   2 92.8517 44.9268   1
   6  -4  -2 132.423 105.426   1
  -6   4   2 93.7195 30.7050   3
  -6   4  -2 84.2782 23.5244   3
  -6  -4   2 56.8828 29.4551   1
   6   4  -2 85.5637 34.7491   1
  -6  -4  -2 29.6569 18.4065   1
   6   4   3 172.803 40.0989   1
   6  -4  -3 218.616 68.8313   1
  -6  -4   3 109.033 33.6288   1
   6   4  -3 30.1899 30.3781   1
  -6   4  -4 976.844 45.1272   3
   6   4  -4 717.126 48.5197   1
   6   4   4 1382.20 76.8697   1
  -6  -4  -4 567.555 30.4668   1
  -6  -4   4 1078.20 66.4644   1
  -6   4  -5 181.631 22.3553   3
   6   4  -5 124.827 29.7243   1
  -6  -4  -5 138.065 24.7601   1
  -6  -4   5 195.969 33.6611   1
  -6   4  -6 106.194 22.7366   3
   6   4  -6 96.6484 28.6677   1
   6   4  -7 11.4165 31.1091   1
  -7   4   0 10.7782 26.3984   3
  -7  -4   0-8.66057 16.0844   1
   7   4   0 36.2529 41.5081   1
  -7   4   1-1.10256 30.8786   3
  -7   4  -1 68.4888 30.7727   3
  -7  -4   1 7.32657 16.0917   1
   7   4  -1-14.9140 37.2812   1
  -7  -4  -1 21.8413 15.7822   1
   7   4   1 45.1858 46.3944   1
  -7   4   2 369.114 45.4407   3
  -7   4  -2 295.819 38.7397   3
   7   4   2 334.232 59.4266   1
  -7  -4   2 102.706 24.8921   1
   7   4  -2 139.963 39.5913   1
  -7  -4  -2 75.5537 18.4636   1
   7   4   3 30.1288 55.3049   1
  -7  -4  -3-5.23180 17.6272   1
   7  -4  -3-70.3484 165.100   1
  -7   4   3-5.96607 41.1491   3
  -7   4  -3-17.6451 27.0874   3
  -7  -4   3-14.1218 24.9579   1
   7   4  -3-36.2134 30.8588   1
  -7  -4  -4 39.5425 17.0868   1
  -7   4  -4 95.3724 24.4051   3
  -7  -4   4 67.9491 31.7197   1
   7   4  -4 43.1576 27.2364   1
   7  -4  -5 52.4918 246.647   1
  -8  -4   0 67.1984 17.1097   1
  -8  -4   1 2.67907 16.4651   1
  -8  -4  -1 14.2483 15.6742   1
  -8  -4  -2 17.3898 17.7213   1
   8  -4  -3 4474.68 995.490   1
   0   0   0    0.00    0.00   0
;
_shelx_hkl_checksum                43391
