# Supplementary material for: Ellinaite, CaCr&lt;sub&gt;2&lt;/sub&gt;O&lt;sub&gt;4&lt;/sub&gt;, a new natural post-spinel oxide from Hatrurim Basin, Israel, and Juína kimberlite field, Brazil
Source: Copernicus journal article supplement (doi:10.5194/ejm-33-727-2021), 2021-12-03
Supplement: Supplementary file 1 [file ejm-33-727-2021-supplement.zip › Suppl-Figs-Ellinaite-pap-EJM-21-07-2121.pdf]

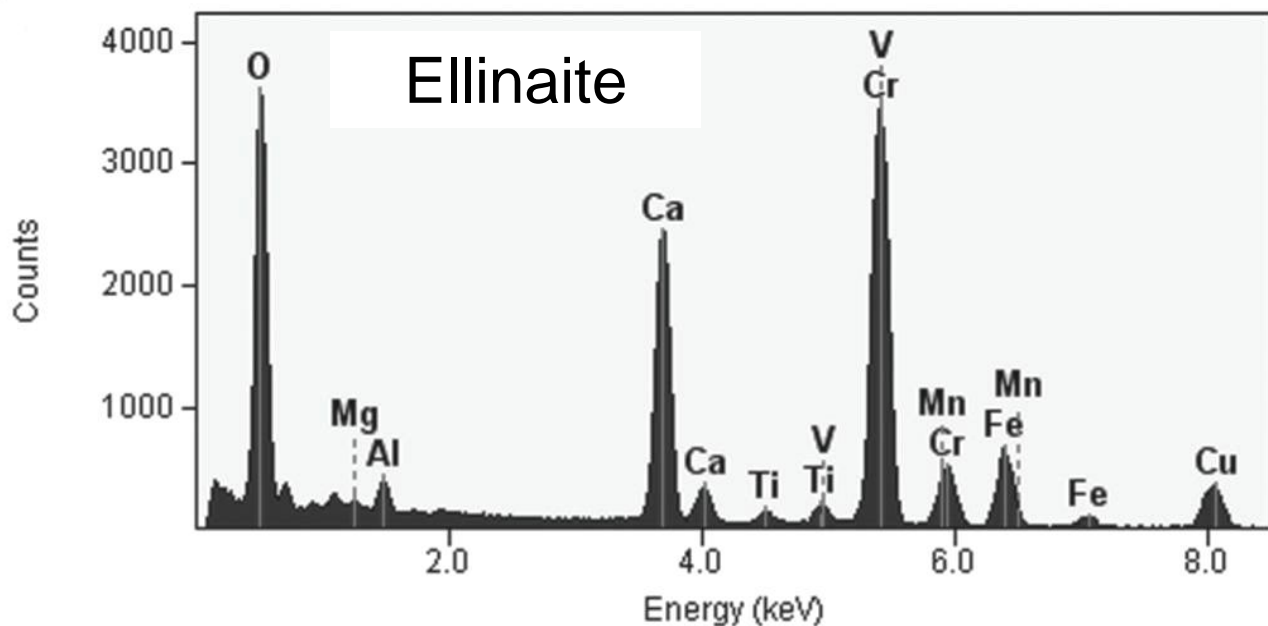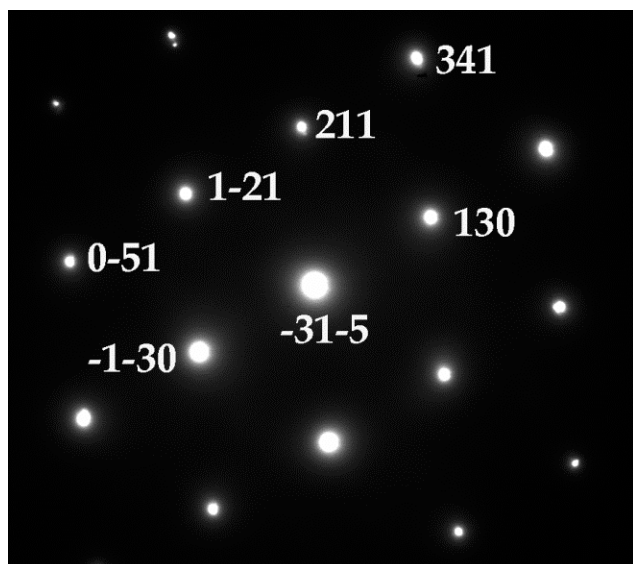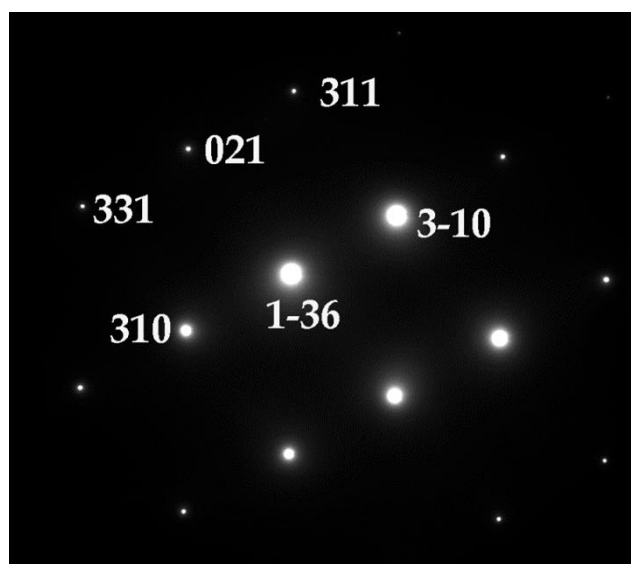

**Figure S1.** EDX spectrum and indexed electron-diffraction patterns (FFT) from HRTEM images for ellinaite from diamond-hosted inclusion, foil #3601, Brazil.  $\text{CuK}_\alpha$  X-ray intensity comes from the copper grid of the TEM foil rests on (adapted from Kaminsky et al., 2015).

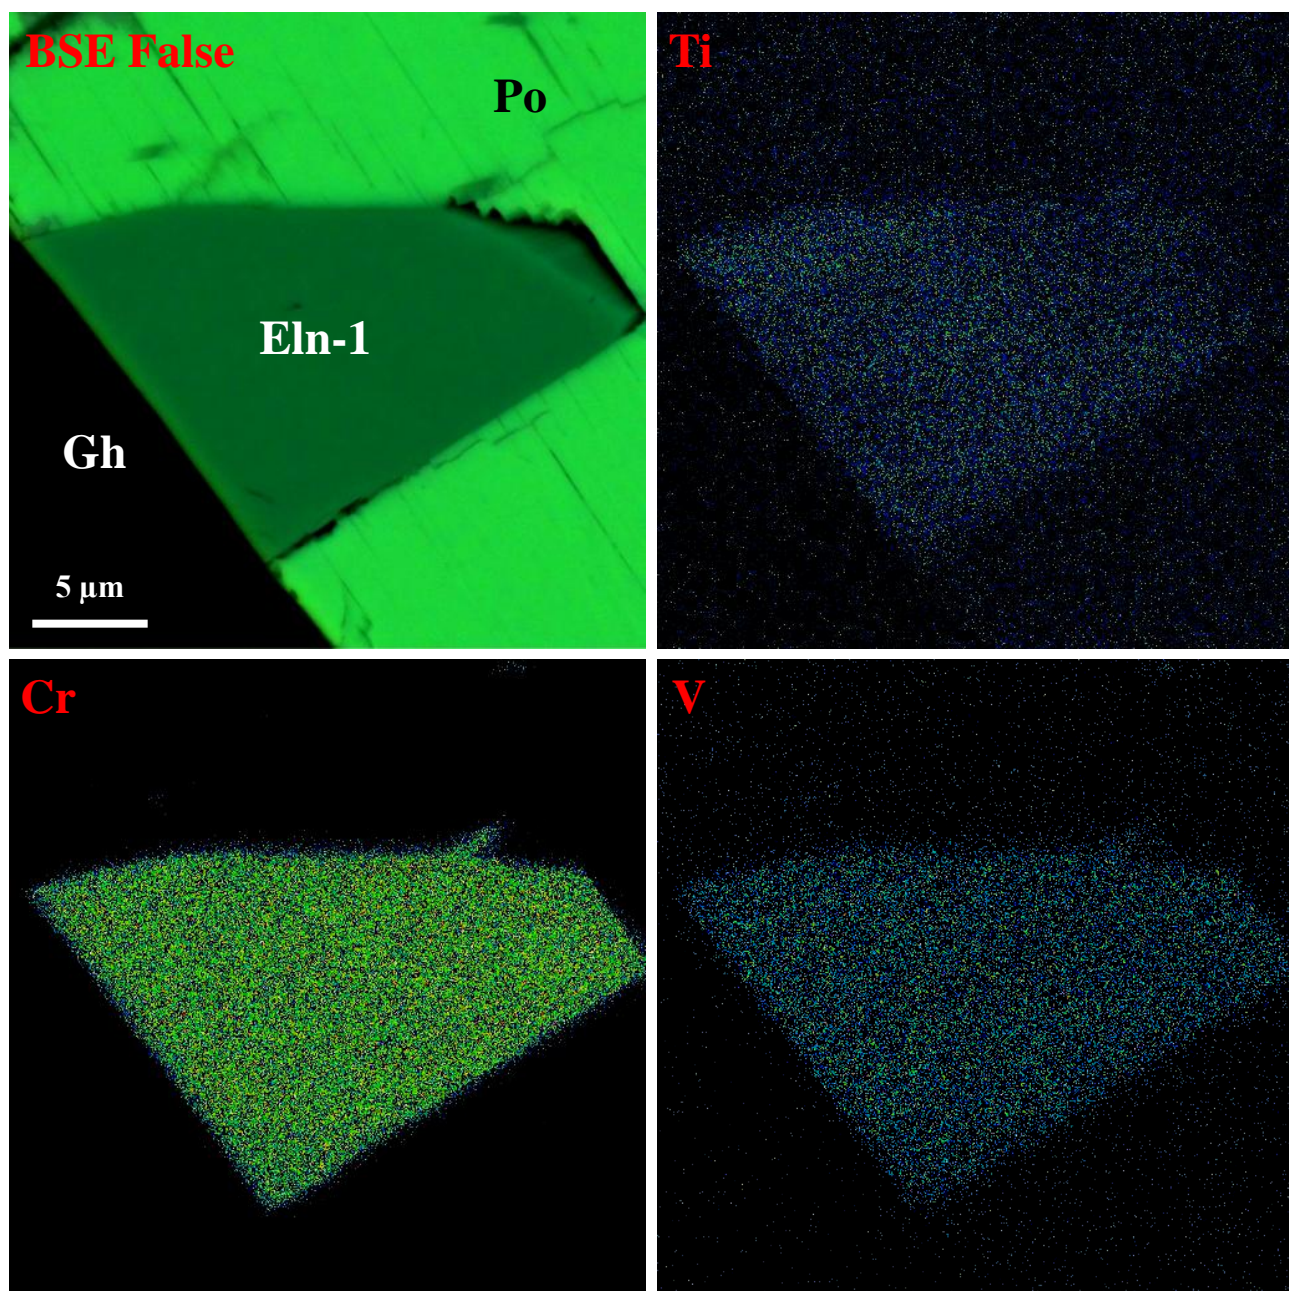

**Figure S2.** Elemental maps for grain of  $\text{CaCr}_2\text{O}_4$  from Hatrurim Basin, Israel. Symbols: Eln-1 – ellinaite-1 grain; Po – pyrrhotite; Gh – gehlenite.

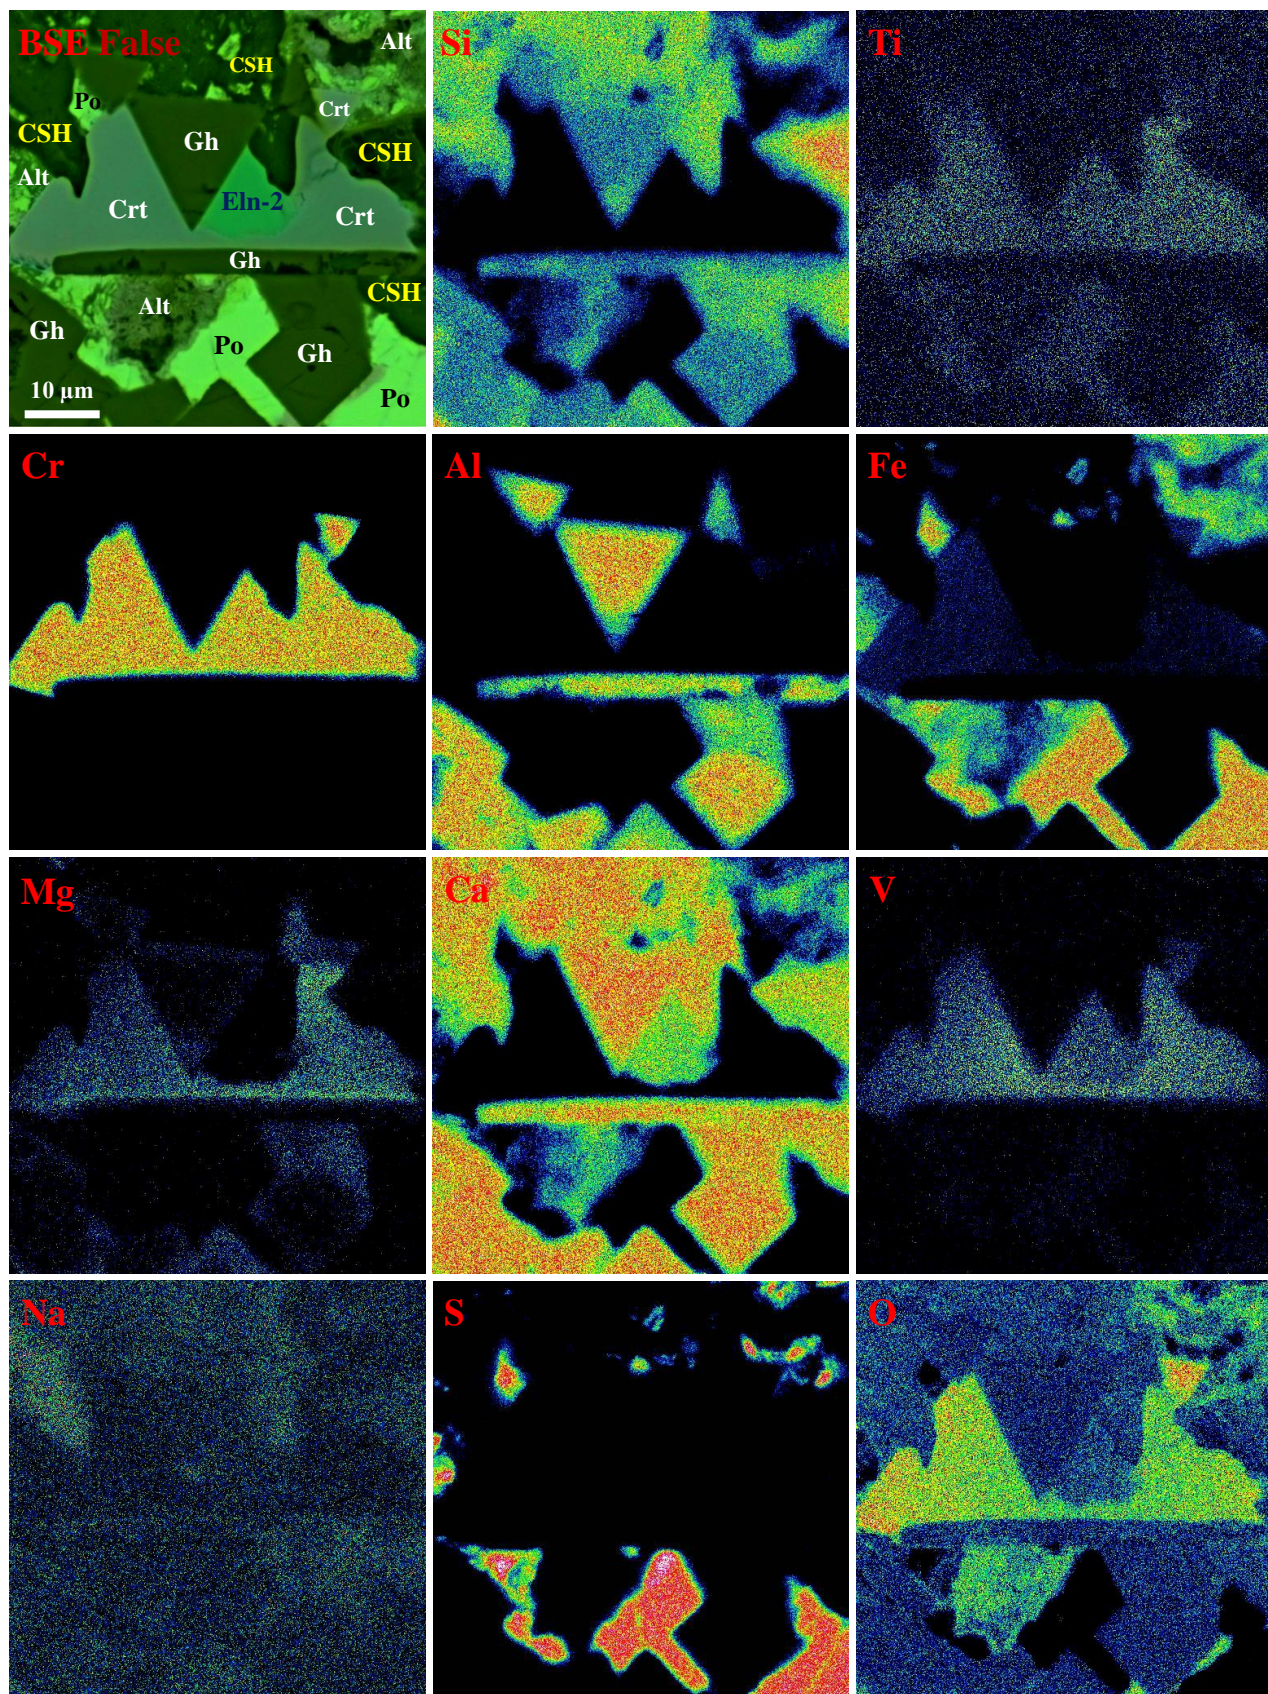

**Figure S3.** Elemental maps for association with the ellinaite-2 grain from gehlenite-rankinite paralava, Hatrurim Basin, Israel. Symbols: Eln-2 – ellinaite; Po – pyrrhotite; Gh – gehlenite; Crt – chromite-magnesiochromite; CSH – hydrated calcium silicates; Alt – alteration products after pyrrhotite. See Figure 3B for details.

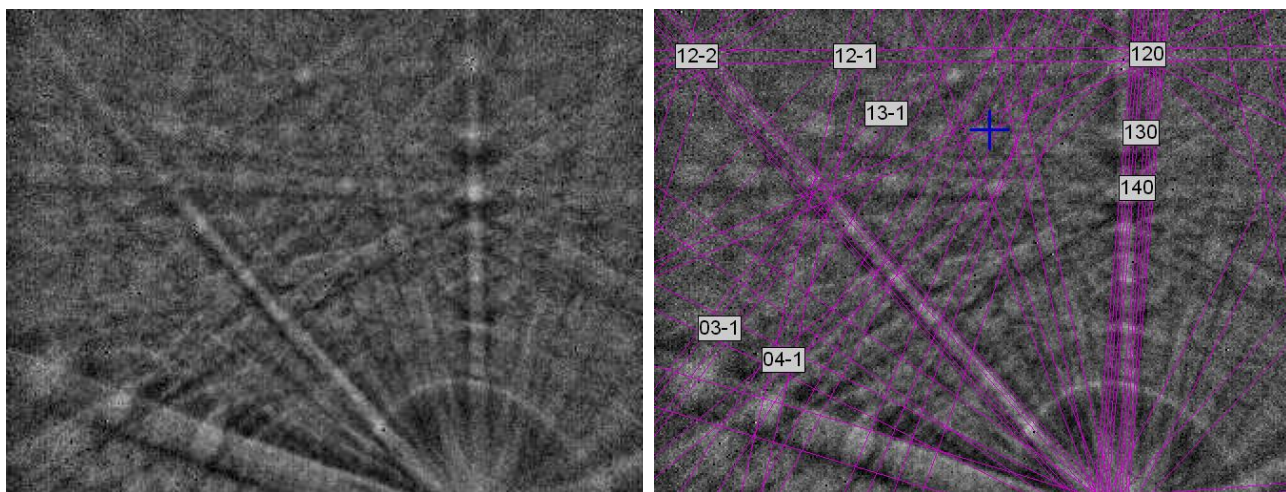

**Figure S4.** Electron backscattered diffraction (EBSD) pattern and the forced Kikuchi pattern for the ellinaite-1 grain from Hatrurim Basin, Israel (see Figures 2, 3, 6 and S2). The structural data for synthetic  $\beta$ - $\text{CaCr}_2\text{O}_4$  (Damay *et al.*, 2010) were used for the Kikuchi pattern simulation. Detector distance – 20 mm. The crystal structure of  $\alpha$ - $\text{CaCr}_2\text{O}_4$  (Pauschand and Müller Buschbaum, 1975) was also used for comparison.

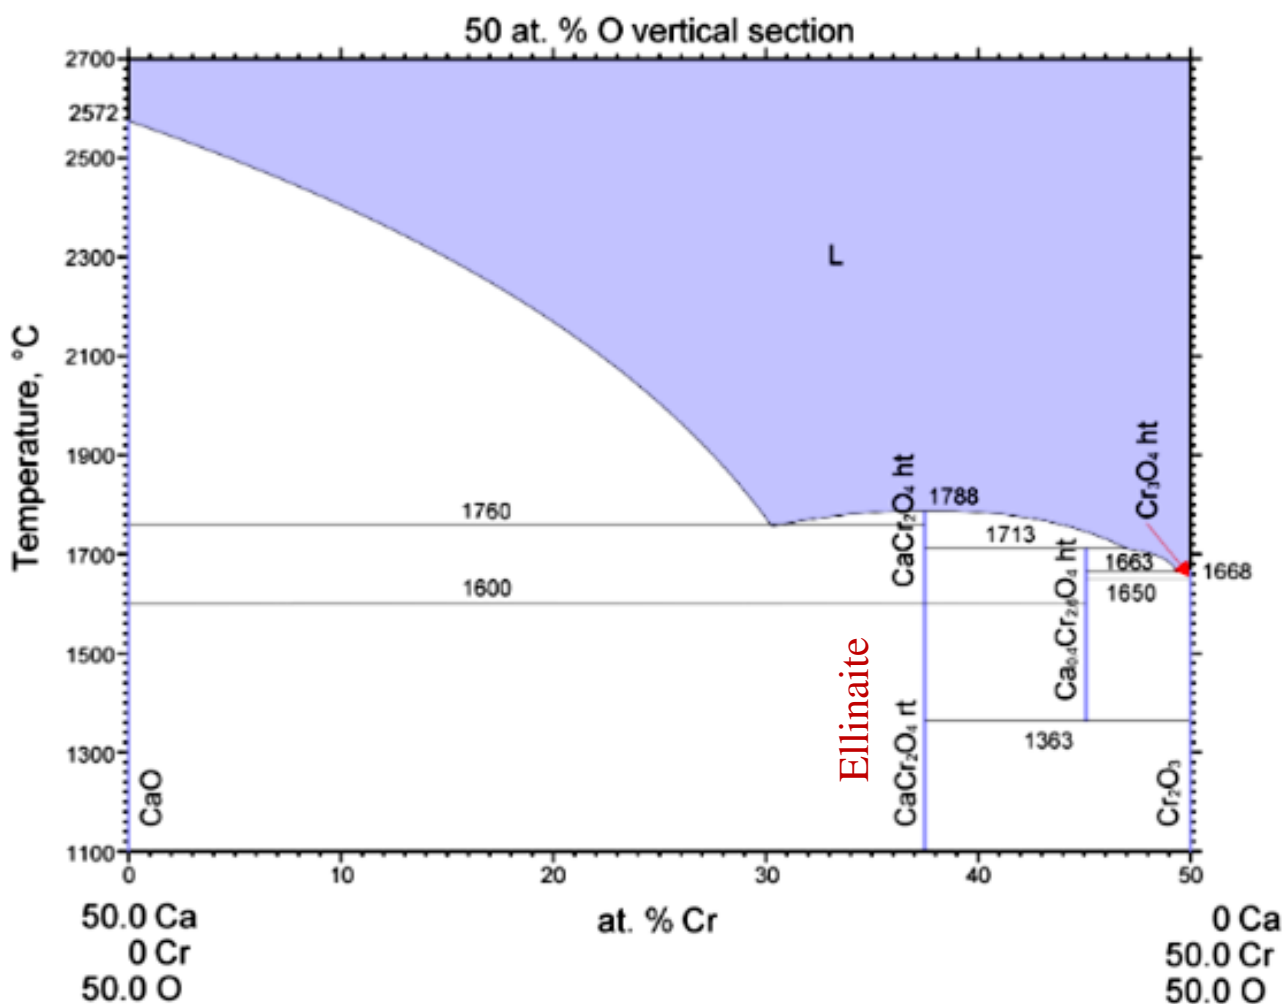

**Figure S5.** The phase diagram for the system  $\text{CaO}-\text{Cr}_2\text{O}_3$  (adapted from Degterov and Pelton, 1996). The phase transition between  $\alpha$ - $\text{CaCr}_2\text{O}_4$  (ht) and  $\beta$ - $\text{CaCr}_2\text{O}_4$  (rt, ellinaite) is near 1600°C.
