# Supplementary material for: Ellinaite, CaCr&lt;sub&gt;2&lt;/sub&gt;O&lt;sub&gt;4&lt;/sub&gt;, a new natural post-spinel oxide from Hatrurim Basin, Israel, and Juína kimberlite field, Brazil
Source: Copernicus journal article supplement (doi:10.5194/ejm-33-727-2021), 2021-12-03
Supplement: Supplementary file 1 [file ejm-33-727-2021-supplement.zip › Tables-Suppl-Eln-EJM-21-07-2021.pdf]

**Table S1.** List of mineral phases found in the rankinite-gehlenite paralava with ellinaite (sample MP-2013-6), Hatrurim Basin, Israel.

| Mineral            | Formula                                                             | Mineral          | Formula                                                                                                                   |
|--------------------|---------------------------------------------------------------------|------------------|---------------------------------------------------------------------------------------------------------------------------|
| Iron (kamacite)    | $\alpha$ -(Fe,Ni)                                                   | Goethite         | FeO(OH)                                                                                                                   |
| Taenite            | $\gamma$ -(Fe,Ni)                                                   | Anhydrite        | CaSO <sub>4</sub>                                                                                                         |
| Tetrataenite       | FeNi                                                                | Baryte           | BaSO <sub>4</sub>                                                                                                         |
| Cohenite           | Fe <sub>3</sub> C                                                   | Fluorapatite     | Ca <sub>5</sub> (PO <sub>4</sub> ) <sub>3</sub> F                                                                         |
| Troilite           | FeS                                                                 | Calcite          | CaCO <sub>3</sub>                                                                                                         |
| Pyrrhotite         | Fe <sub>1-x</sub> S                                                 | Wollastonite     | CaSiO <sub>3</sub>                                                                                                        |
| Pyrite             | FeS <sub>2</sub>                                                    | Larnite          | $\alpha$ -Ca <sub>2</sub> SiO <sub>4</sub>                                                                                |
| Pentlandite        | (Ni,Fe) <sub>9</sub> S <sub>8</sub>                                 | Flamite          | $\alpha'_L$ -Ca <sub>2</sub> SiO <sub>4</sub> = (Na,K)Ca <sub>9</sub> (SiO <sub>4</sub> ) <sub>4</sub> (PO <sub>4</sub> ) |
| “Gmalimite”        | (K,Ba) <sub>6</sub> □Fe <sup>2+</sup> <sub>24</sub> S <sub>27</sub> | Grossular        | Ca <sub>2</sub> Al <sub>3</sub> (SiO <sub>4</sub> ) <sub>3</sub>                                                          |
| Zoharite           | (Ba,K) <sub>6</sub> (Fe,Cu,Ni) <sub>25</sub> S <sub>27</sub>        | Andradite        | Ca <sub>2</sub> Fe <sub>3</sub> (SiO <sub>4</sub> ) <sub>3</sub>                                                          |
| “Ba-Cr-sulfide”    | (Ba,Cr)S                                                            | “Ca-Fe-silicate” | Ca <sub>4</sub> Fe <sub>2</sub> (SiO <sub>4</sub> ) <sub>3</sub>                                                          |
| “Fe-Ni-As phase”   | (Fe,Ni)As                                                           | Rankinite        | Ca <sub>3</sub> (Si <sub>2</sub> O <sub>7</sub> )                                                                         |
| “Ni-Fe-As phase”   | (Ni,Fe) <sub>2</sub> As                                             | Gehlenite        | Ca <sub>2</sub> Al(AlSiO <sub>7</sub> )                                                                                   |
| “Ca-Fe-oxysulfide” | CaFe <sub>3</sub> S <sub>2</sub> O <sub>5</sub>                     | Akermanite       | Ca <sub>2</sub> Mg(Si <sub>2</sub> O <sub>7</sub> )                                                                       |
| Wustite            | (Fe,Mg)O                                                            | Cuspidine        | Ca <sub>4</sub> (Si <sub>2</sub> O <sub>7</sub> )F <sub>2</sub>                                                           |
| Perovskite         | Ca(Ti,Cr,Si,P)O <sub>3</sub>                                        | Thaumasite       | Ca <sub>3</sub> (SO <sub>4</sub> )[Si(OH) <sub>6</sub> ](CO <sub>3</sub> ) 12H <sub>2</sub> O                             |
| Ellinaite          | $\beta$ -CaCr <sub>2</sub> O <sub>4</sub>                           | Jennite          | Ca <sub>9</sub> (Si <sub>3</sub> O <sub>9</sub> ) <sub>2</sub> (OH) <sub>8</sub> 8H <sub>2</sub> O                        |
| Chromite           | (Fe,Mg)Cr <sub>2</sub> O <sub>4</sub>                               | Afwillite        | Ca <sub>3</sub> (HSiO <sub>4</sub> ) <sub>2</sub> 2H <sub>2</sub> O                                                       |
| Magnesiochromite   | (Mg,Fe)Cr <sub>2</sub> O <sub>4</sub>                               | Tobermorite      | Ca <sub>5</sub> Si <sub>6</sub> O <sub>16</sub> (OH) <sub>2</sub> 4H <sub>2</sub> O                                       |
| Magnetite          | FeFe <sub>2</sub> O <sub>4</sub>                                    | Plombierite      | Ca <sub>5</sub> Si <sub>6</sub> O <sub>16</sub> (OH) <sub>2</sub> 8H <sub>2</sub> O                                       |
| Hematite           | Fe <sub>2</sub> O <sub>3</sub>                                      | CSH*             | calcium silicates hydrated                                                                                                |

Identification of mineral phases was based on the EDS, WDS and Raman data (Sharygin, 2019, Sharygin et al., 2019a-b and this work). The names in inverted commas mean poorly identified phases or potentially new mineral species. \* Some of Ca-rich secondary minerals were not identified: it mainly concerns to alteration products after larnite-flamite (hydrated calcium silicates) and pyrrhotite. Fe-rich periclase, Mg-rich wustite and poorly identified oxysulfide Ca<sub>9</sub>Fe<sub>11</sub>S<sub>9</sub>O<sub>13</sub> were observed in other samples of the rankinite-gehlenite paralava.

**Table S2.** Chemical composition (WDS, in wt.%) for essential and minor minerals of the rankinite-gehlenite paralava with ellinaite (sample MP-2013-6), Hatrurim Basin.

| Area            | EDS spot | Phase   | SiO <sub>2</sub> | TiO <sub>2</sub> | ZrO <sub>2</sub> | Cr <sub>2</sub> O <sub>3</sub> | V <sub>2</sub> O <sub>3</sub> | Al <sub>2</sub> O <sub>3</sub> | FeO  | MnO  | MgO  | NiO  | CaO   | SrO  | Na <sub>2</sub> O | K <sub>2</sub> O | P <sub>2</sub> O <sub>5</sub> | SO <sub>3</sub> | F    | Cl   | Sum    | O-F <sub>2</sub> | Sum    |
|-----------------|----------|---------|------------------|------------------|------------------|--------------------------------|-------------------------------|--------------------------------|------|------|------|------|-------|------|-------------------|------------------|-------------------------------|-----------------|------|------|--------|------------------|--------|
| <b>M6-3</b>     | 1        | Gh      | 22.78            | 0.02             | 0.00             | 0.00                           | 0.00                          | 33.94                          | 0.29 | 0.02 | 0.30 | 0.00 | 41.17 | 0.00 | 0.07              | 0.03             | 0.06                          | 0.00            |      | 0.00 | 98.69  | 0.00             | 98.69  |
| <b>M6-3-2</b>   | new      | Gh-c    | 25.43            | 0.04             | 0.00             | 0.00                           | 0.00                          | 31.20                          | 0.54 | 0.00 | 1.47 | 0.00 | 40.43 | 0.00 | 0.27              | 0.08             | 0.00                          | 0.00            |      | 0.00 | 99.47  | 0.00             | 99.47  |
| <b>M6-3-2</b>   | new      | Gh-Ak-r | 31.70            | 0.05             | 0.00             | 0.00                           | 0.00                          | 21.97                          | 0.70 | 0.00 | 4.46 | 0.04 | 39.83 | 0.00 | 0.84              | 0.18             | 0.00                          | 0.00            |      | 0.00 | 99.75  | 0.00             | 99.75  |
| <b>M6-8</b>     | 3        | Gh      | 23.12            | 0.03             | 0.00             | 0.00                           | 0.00                          | 34.07                          | 0.23 | 0.04 | 0.51 | 0.00 | 41.20 | 0.00 | 0.05              | 0.00             | 0.10                          | 0.00            |      | 0.00 | 99.34  | 0.00             | 99.34  |
| <b>M6-n6</b>    | 1        | Gh      | 22.74            | 0.00             | 0.00             | 0.00                           | 0.00                          | 34.50                          | 0.29 | 0.00 | 0.44 | 0.00 | 41.08 | 0.00 | 0.06              | 0.00             | 0.00                          | 0.00            |      | 0.00 | 99.12  | 0.00             | 99.12  |
| <b>M6-n7</b>    | 1        | Gh-Ak-r | 30.89            | 0.22             | 0.00             | 0.00                           | 0.00                          | 23.01                          | 0.50 | 0.00 | 4.73 | 0.00 | 39.51 | 0.00 | 0.97              | 0.10             | 0.00                          | 0.00            |      | 0.00 | 99.93  | 0.00             | 99.93  |
| <b>M6-3</b>     | 2        | Ran     | 41.59            | 0.08             | 0.00             | 0.00                           | 0.00                          | 0.00                           | 0.17 | 0.00 | 0.00 | 0.00 | 58.35 | 0.00 | 0.00              | 0.00             | 0.16                          | 0.00            |      | 0.00 | 100.34 | 0.00             | 100.34 |
| <b>M6-3-2</b>   | 16       | Ran     | 41.51            | 0.08             | 0.00             | 0.00                           | 0.00                          | 0.00                           | 0.17 | 0.00 | 0.07 | 0.00 | 58.25 | 0.00 | 0.06              | 0.00             | 0.21                          | 0.00            |      | 0.00 | 100.35 | 0.00             | 100.35 |
| <b>M6-4</b>     |          | Ran     | 41.84            | 0.06             | 0.00             | 0.00                           | 0.00                          | 0.00                           | 0.14 | 0.00 | 0.08 | 0.00 | 58.05 | 0.00 | 0.00              | 0.00             | 0.20                          | 0.00            |      | 0.00 | 100.38 | 0.00             | 100.38 |
| <b>M6-n6</b>    | 11       | Ran     | 41.38            | 0.20             | 0.00             | 0.00                           | 0.00                          | 0.00                           | 0.15 | 0.00 | 0.08 | 0.00 | 58.27 | 0.00 | 0.00              | 0.00             | 0.18                          | 0.00            |      | 0.00 | 100.26 | 0.00             | 100.26 |
| <b>M6-8</b>     | 2        | Ran     | 41.39            | 0.21             | 0.00             | 0.00                           | 0.00                          | 0.00                           | 0.05 | 0.00 | 0.07 | 0.00 | 58.39 | 0.00 | 0.00              | 0.00             | 0.19                          | 0.00            |      | 0.00 | 100.30 | 0.00             | 100.30 |
| <b>M6-5-new</b> | 2        | Lar     | 32.15            | 0.00             | 0.00             | 0.00                           | 0.00                          | 0.32                           | 0.05 | 0.00 | 0.02 | 0.00 | 63.63 | 0.00 | 0.66              | 0.34             | 2.77                          | 0.00            |      | 0.00 | 98.94  | 0.00             | 98.94  |
| <b>M6-5-new</b> | 3        | Lar     | 32.37            | 0.00             | 0.00             | 0.00                           | 0.00                          | 0.00                           | 0.05 | 0.00 | 0.02 | 0.00 | 63.87 | 0.00 | 0.57              | 0.33             | 3.02                          | 0.00            |      | 0.00 | 100.23 | 0.00             | 100.23 |
| <b>M6-5-new</b> | 9        | Lar     | 32.35            | 0.00             | 0.00             | 0.00                           | 0.00                          | 0.00                           | 0.23 | 0.00 | 0.02 | 0.00 | 63.80 | 0.00 | 0.73              | 0.35             | 2.91                          | 0.00            |      | 0.00 | 100.39 | 0.00             | 100.39 |
| <b>MP6-n7</b>   | 11       | Lar     | 31.36            | 0.00             | 0.00             | 0.00                           | 0.00                          | 0.15                           | 0.02 | 0.00 | 0.02 | 0.00 | 62.26 | 0.00 | 0.71              | 0.46             | 4.61                          | 0.00            |      | 0.00 | 99.59  | 0.00             | 99.59  |
| <b>M6-3</b>     | 3        | Flm     | 28.68            | 0.00             | 0.00             | 0.00                           | 0.00                          | 0.06                           | 0.48 | 0.00 | 2.20 | 0.00 | 58.23 | 0.00 | 0.77              | 0.37             | 8.51                          | 0.22            |      | 0.16 | 99.68  | 0.00             | 99.68  |
| <b>M6-2</b>     | 16       | Flm     | 28.94            | 0.00             | 0.00             | 0.00                           | 0.00                          | 0.11                           | 0.20 | 0.00 | 0.96 | 0.00 | 58.13 | 0.00 | 1.04              | 0.55             | 7.68                          | 0.34            |      | 0.39 | 98.34  | 0.00             | 98.34  |
| <b>M6-2</b>     | 5        | Flm     | 27.01            | 0.00             | 0.00             | 0.00                           | 0.00                          | 0.00                           | 0.09 | 0.00 | 0.16 | 0.00 | 59.17 | 0.00 | 1.09              | 0.64             | 10.34                         | 0.13            |      | 0.15 | 98.77  | 0.00             | 98.77  |
| <b>M6-2</b>     | 8        | Cus     | 32.08            | 1.26             | 0.12             | 0.00                           | 0.00                          | 0.00                           | 0.00 | 0.00 | 0.12 | 0.00 | 60.40 | 0.00 | 0.08              | 0.00             | 0.36                          | 0.00            | 9.74 | 0.00 | 104.16 | 4.10             | 100.06 |
| <b>M6-2</b>     | 15       | Cus     | 31.65            | 1.28             | 0.06             | 0.00                           | 0.00                          | 0.00                           | 0.04 | 0.00 | 0.10 | 0.00 | 60.30 | 0.00 | 0.02              | 0.00             | 0.72                          | 0.00            | 9.72 | 0.00 | 103.89 | 4.09             | 99.80  |
| <b>M6-1</b>     | 15       | Ap      | 3.14             | 0.00             | 0.00             | 0.00                           | 0.03                          | 0.00                           | 0.37 | 0.00 | 0.00 | 0.00 | 55.19 | 0.08 | 0.00              | 0.00             | 39.05                         | 0.10            | 3.33 | 0.00 | 101.28 | 1.40             | 99.88  |
| <b>M6-n1</b>    | 3        | Ap-c    | 3.59             | 0.00             | 0.00             | 0.00                           | 0.00                          | 0.00                           | 0.04 | 0.00 | 0.00 | 0.00 | 55.10 | 0.24 | 0.03              | 0.00             | 39.60                         | 0.07            | 3.59 | 0.00 | 102.26 | 1.51             | 100.75 |
| <b>M6-n1</b>    | 4        | Ap-r    | 2.33             | 0.00             | 0.00             | 0.00                           | 0.00                          | 0.00                           | 0.00 | 0.04 | 0.00 | 0.00 | 55.22 | 0.23 | 0.00              | 0.00             | 40.53                         | 0.10            | 3.44 | 0.00 | 101.88 | 1.45             | 100.43 |
| <b>M6-3-2</b>   | 9        | Ap      | 3.25             | 0.00             | 0.00             | 0.00                           | 0.00                          | 0.00                           | 0.35 | 0.00 | 0.00 | 0.00 | 55.41 | 0.00 | 0.00              | 0.00             | 39.54                         | 0.13            | 3.03 | 0.00 | 101.71 | 1.28             | 100.44 |

Symbols: Gh – gehlenite; Ak – akermanite; Ran – rankinite; Flm – flamite; Cus – cuspidine; Ap – fluorapatite; Si-Prv – Si-rich perovskite; Mg-Crt – magnesiochromite; Crt – chromite; Mgt – magnetite; Wu – wustite; c, r – core, rim of grain. F is determined by EDS.

**Table S2 (cont.).** Chemical composition (WDS, in wt.%) for essential and minor minerals of the rankinite-gehlenite paralava with ellinaite (sample MP-2013-6), Hatrurim Basin.

| Area            | EDS spot | Phase  | SiO <sub>2</sub> | TiO <sub>2</sub> | ZrO <sub>2</sub> | Cr <sub>2</sub> O <sub>3</sub> | V <sub>2</sub> O <sub>3</sub> | Al <sub>2</sub> O <sub>3</sub> | FeO   | MnO  | MgO   | NiO  | CaO   | SrO  | Na <sub>2</sub> O | K <sub>2</sub> O | P <sub>2</sub> O <sub>5</sub> | SO <sub>3</sub> | F | Cl   | Sum    | O-F <sub>2</sub> | Sum    |
|-----------------|----------|--------|------------------|------------------|------------------|--------------------------------|-------------------------------|--------------------------------|-------|------|-------|------|-------|------|-------------------|------------------|-------------------------------|-----------------|---|------|--------|------------------|--------|
| <b>M6-n1</b>    | 5        | Si-Prv | 5.07             | 44.81            | 0.00             | 1.61                           | 1.62                          | 0.79                           | 0.23  | 0.00 | 0.46  | 0.00 | 42.94 | 0.00 | 0.14              | 0.05             | 0.74                          | 0.00            |   | 0.00 | 98.46  | 0.00             | 98.46  |
| <b>M6-n1</b>    | 6        | Si-Prv | 5.76             | 44.20            | 0.05             | 1.62                           | 1.73                          | 0.89                           | 0.18  | 0.00 | 0.47  | 0.00 | 43.13 | 0.00 | 0.15              | 0.05             | 0.76                          | 0.00            |   | 0.00 | 99.00  | 0.00             | 99.00  |
| <b>M6-n1</b>    | 7,12     | Si-Prv | 4.55             | 45.98            | 0.00             | 1.71                           | 1.71                          | 0.90                           | 0.19  | 0.00 | 0.40  | 0.00 | 42.30 | 0.09 | 0.11              | 0.04             | 0.41                          | 0.00            |   | 0.00 | 98.39  | 0.00             | 98.39  |
| <b>M6-n1</b>    | 8        | Si-Prv | 7.22             | 40.87            | 0.37             | 1.95                           | 1.80                          | 1.29                           | 0.26  | 0.00 | 0.98  | 0.00 | 42.56 | 0.00 | 0.09              | 0.03             | 0.71                          | 0.00            |   | 0.00 | 98.13  | 0.00             | 98.13  |
| <b>M6-n1</b>    | 9        | Si-Prv | 6.35             | 42.06            | 0.17             | 1.74                           | 1.63                          | 1.13                           | 0.17  | 0.03 | 0.71  | 0.00 | 42.85 | 0.00 | 0.18              | 0.03             | 0.97                          | 0.00            |   | 0.00 | 98.03  | 0.00             | 98.03  |
| <b>M6-3</b>     | 10       | Si-Prv | 9.74             | 37.61            | 0.15             | 1.71                           | 1.46                          | 1.34                           | 0.26  | 0.00 | 1.10  | 0.00 | 45.04 | 0.00 | 0.38              | 0.13             | 1.38                          | 0.00            |   | 0.00 | 100.31 | 0.00             | 100.31 |
| <b>M6-3-2</b>   | 20       | Si-Prv | 8.49             | 39.48            | 0.22             | 2.21                           | 1.72                          | 1.26                           | 0.22  | 0.04 | 1.01  | 0.00 | 44.68 | 0.00 | 0.23              | 0.06             | 0.71                          | 0.00            |   | 0.00 | 100.34 | 0.00             | 100.34 |
| <b>M6-2</b>     | 3        | Si-Prv | 9.27             | 38.97            | 0.00             | 1.76                           | 1.68                          | 1.21                           | 0.33  | 0.00 | 1.04  | 0.00 | 44.67 | 0.00 | 0.32              | 0.07             | 1.50                          | 0.00            |   | 0.00 | 100.82 | 0.00             | 100.82 |
| <b>M6-11-2</b>  | 7,8,9    | Si-Prv | 8.18             | 40.30            | 0.15             | 2.65                           | 1.79                          | 1.48                           | 0.51  | 0.00 | 0.99  | 0.00 | 41.42 | 0.00 | 0.46              | 0.04             | 0.67                          | 0.00            |   | 0.00 | 98.64  | 0.00             | 98.64  |
| <b>M6-11-2</b>  | 2        | Si-Prv | 10.33            | 36.03            | 0.10             | 2.50                           | 1.92                          | 1.38                           | 0.40  | 0.00 | 1.37  | 0.00 | 44.37 | 0.00 | 0.28              | 0.12             | 1.05                          | 0.00            |   | 0.00 | 99.85  | 0.00             | 99.85  |
| <b>M6-11-2</b>  | 3        | Si-Prv | 8.41             | 40.21            | 0.05             | 2.76                           | 1.89                          | 1.42                           | 0.39  | 0.00 | 1.06  | 0.00 | 42.20 | 0.00 | 0.33              | 0.04             | 0.95                          | 0.00            |   | 0.00 | 99.72  | 0.00             | 99.72  |
| <b>M6-11-2</b>  | 4        | Si-Prv | 8.78             | 39.05            | 0.40             | 2.70                           | 1.93                          | 1.46                           | 0.41  | 0.00 | 1.15  | 0.00 | 41.94 | 0.00 | 0.33              | 0.05             | 0.75                          | 0.00            |   | 0.00 | 98.96  | 0.00             | 98.96  |
| <b>M6-8</b>     | 7        | Si-Prv | 9.27             | 38.44            | 0.24             | 2.45                           | 1.68                          | 1.41                           | 0.18  | 0.00 | 1.04  | 0.00 | 44.37 | 0.00 | 0.30              | 0.07             | 1.04                          | 0.00            |   | 0.00 | 100.51 | 0.00             | 100.51 |
| <b>M6-8</b>     | 8        | Si-Prv | 9.09             | 38.80            | 0.14             | 2.44                           | 1.60                          | 1.43                           | 0.13  | 0.00 | 1.23  | 0.00 | 44.35 | 0.00 | 0.29              | 0.10             | 0.95                          | 0.00            |   | 0.00 | 100.54 | 0.00             | 100.54 |
| <b>M6-n6</b>    | 8,7      | Mg-Crt | 0.17             | 2.20             | 0.00             | 61.95                          | 7.38                          | 1.45                           | 16.30 | 0.49 | 9.17  | 0.00 | 0.45  | 0.00 | 0.00              | 0.00             | 0.00                          | 0.00            |   | 0.00 | 99.57  | 0.00             | 99.57  |
| <b>M6-n6</b>    | 3        | Mg-Crt | 0.20             | 2.27             | 0.00             | 61.32                          | 8.26                          | 1.22                           | 16.56 | 0.52 | 9.26  | 0.00 | 0.58  | 0.00 | 0.00              | 0.00             | 0.00                          | 0.00            |   | 0.00 | 100.21 | 0.00             | 100.19 |
| <b>M6-n7</b>    | 5        | Mg-Crt | 0.24             | 3.24             | 0.00             | 62.29                          | 8.61                          | 0.87                           | 10.61 | 0.50 | 13.33 | 0.00 | 0.56  | 0.00 | 0.00              | 0.00             | 0.00                          | 0.00            |   | 0.00 | 100.25 | 0.00             | 100.25 |
| <b>M6-11-1</b>  | 4        | Crt    | 0.00             | 2.38             | 0.00             | 64.29                          | 3.90                          | 1.09                           | 25.17 | 0.44 | 3.08  | 0.00 | 0.22  | 0.00 | 0.00              | 0.00             | 0.00                          | 0.00            |   | 0.00 | 100.58 | 0.00             | 100.58 |
| <b>M6-11-1</b>  | 3        | Crt    | 0.00             | 1.52             | 0.00             | 62.21                          | 3.31                          | 3.45                           | 25.23 | 0.46 | 3.78  | 0.00 | 0.22  | 0.00 | 0.00              | 0.00             | 0.00                          | 0.00            |   | 0.00 | 100.18 | 0.00             | 100.18 |
| <b>MP6-n1-2</b> | 13       | Wu     | 0.00             | 0.00             | 0.00             | 0.00                           | 0.00                          | 0.00                           | 99.99 | 0.00 | 0.00  | 0.00 | 0.26  | 0.00 | 0.00              | 0.00             | 0.00                          | 0.00            |   | 0.00 | 100.25 | 0.00             | 100.25 |
| <b>MP6-n1-2</b> | 14       | Wu     | 0.00             | 0.00             | 0.00             | 0.00                           | 0.00                          | 0.00                           | 99.59 | 0.00 | 0.68  | 0.00 | 0.23  | 0.00 | 0.00              | 0.00             | 0.00                          | 0.00            |   | 0.00 | 100.50 | 0.00             | 100.50 |
| <b>MP6-n1-3</b> | 13       | Wu     | 0.00             | 0.00             | 0.00             | 0.00                           | 0.00                          | 0.00                           | 99.87 | 0.00 | 0.18  | 0.00 | 0.21  | 0.00 | 0.00              | 0.00             | 0.00                          | 0.00            |   | 0.00 | 100.26 | 0.00             | 100.26 |
| <b>M6-11-1</b>  | 2        | Mgt    | 0.00             | 0.37             | 0.00             | 2.99                           | 0.22                          | 2.22                           | 86.82 | 0.12 | 0.53  | 0.15 | 0.63  | 0.00 | 0.00              | 0.00             | 0.00                          | 0.00            |   | 0.00 | 94.05  | 0.00             | 94.05  |

Symbols: Gh – gehlenite; Ak – akermanite; Ran – rankinite; Flm – flamite; Cus – cuspidine; Ap – fluorapatite; Si-Prv – Si-rich perovskite; Mg-Crt – magnesiochromite; Crt – chromite; Mgt – magnetite; Wu – wustite; c, r – core, rim of grain. F is determined by EDS.

**Table S3.** Variations of chemical composition (in wt.%) for the ellinaite-1 grain from rankinite-gehlenite paralava (sample MP-2013-6), Hatrurim Basin.

| Method | Picture                                | EDS spot | TiO <sub>2</sub> total | Cr <sub>2</sub> O <sub>3</sub> | V <sub>2</sub> O <sub>3</sub> | Al <sub>2</sub> O <sub>3</sub> | FeO  | MnO  | MgO  | CaO   | Na <sub>2</sub> O | Sum    | Sum oxy | Ti <sup>3+</sup> | Ti <sup>4+</sup> | Ti <sub>2</sub> O <sub>3</sub> calc. | TiO <sub>2</sub> calc. | Sum    |
|--------|----------------------------------------|----------|------------------------|--------------------------------|-------------------------------|--------------------------------|------|------|------|-------|-------------------|--------|---------|------------------|------------------|--------------------------------------|------------------------|--------|
|        | ideal CaCr <sub>2</sub> O <sub>4</sub> |          |                        | 73.05                          |                               |                                |      |      |      | 26.95 |                   | 100.00 | 8.000   |                  |                  |                                      |                        | 100.00 |
| EDS    | MP-6-4                                 | 4        | 3.52                   | 62.63                          | 6.66                          | 0.60                           | 0.48 | 0.00 |      | 26.11 | 0.15              | 100.15 | 8.091   | 0.091            | 0.000            | 3.17                                 | 0.00                   | 99.80  |
| EDS    | MP-6-4 2                               | 2        | 3.65                   | 61.69                          | 7.16                          | 0.77                           | 0.49 | 0.00 |      | 26.11 | 0.15              | 100.02 | 8.094   | 0.094            | 0.001            | 3.26                                 | 0.02                   | 99.66  |
| EDS    | MP-6-4 2                               | 3        | 3.54                   | 61.79                          | 7.44                          | 0.74                           | 0.46 | 0.04 |      | 26.16 | 0.15              | 100.32 | 8.092   | 0.092            | 0.000            | 3.19                                 | 0.00                   | 99.97  |
| EDS    | MP-6-4 2                               | 4        | 3.62                   | 62.04                          | 7.19                          | 0.89                           | 0.50 | 0.00 |      | 25.92 | 0.31              | 100.47 | 8.084   | 0.084            | 0.009            | 2.94                                 | 0.35                   | 100.14 |
| EDS    | MP-6-4 2                               | 5        | 3.22                   | 62.67                          | 6.71                          | 0.60                           | 0.54 | 0.00 |      | 26.12 | 0.15              | 100.01 | 8.081   | 0.081            | 0.003            | 2.79                                 | 0.12                   | 99.70  |
| EDS    | MP-6-4 2                               | 6        | 3.44                   | 62.51                          | 6.80                          | 0.67                           | 0.48 | 0.03 |      | 26.12 | 0.15              | 100.20 | 8.089   | 0.089            | 0.000            | 3.08                                 | 0.01                   | 99.86  |
| EDS    | MP-6-4 2                               | 7        | 2.87                   | 63.31                          | 6.69                          | 0.66                           | 0.64 | 0.00 |      | 26.08 | 0.15              | 100.40 | 8.074   | 0.074            | 0.001            | 2.56                                 | 0.02                   | 100.12 |
| EDS    | MP-6-4 2                               | 8        | 3.49                   | 62.00                          | 7.56                          | 0.72                           | 0.66 | 0.00 |      | 26.15 | 0.15              | 100.73 | 8.090   | 0.090            | 0.000            | 3.13                                 | 0.02                   | 100.38 |
| EDS    | M6-4-new                               | 3        | 2.65                   | 63.24                          | 7.55                          | 0.63                           | 0.49 | 0.00 | 0.00 | 26.04 | 0.26              | 100.86 | 8.064   | 0.064            | 0.004            | 2.24                                 | 0.16                   | 100.61 |
| EDS    | M6-4-new                               | 4        | 2.75                   | 61.95                          | 7.91                          | 0.64                           | 0.37 | 0.00 | 0.00 | 26.20 | 0.15              | 99.97  | 8.071   | 0.071            | 0.001            | 2.45                                 | 0.03                   | 99.70  |
| EDS    | M6-4-new                               | 5        | 3.00                   | 62.55                          | 7.52                          | 0.72                           | 0.45 | 0.00 | 0.00 | 25.80 | 0.27              | 100.31 | 8.077   | 0.077            | 0.001            | 2.67                                 | 0.03                   | 100.01 |
| EDS    | M6-4-new                               | 6        | 3.55                   | 62.22                          | 7.11                          | 0.78                           | 0.37 | 0.00 | 0.00 | 25.97 | 0.23              | 100.23 | 8.092   | 0.092            | 0.000            | 3.19                                 | 0.01                   | 99.88  |
| EDS    | M6-4-new                               | 7        | 3.62                   | 62.38                          | 6.87                          | 0.66                           | 0.42 | 0.00 | 0.00 | 26.00 | 0.20              | 100.15 | 8.094   | 0.094            | 0.000            | 3.25                                 | 0.01                   | 99.79  |
| EDS    | M6-4-new                               | 8        | 3.40                   | 62.74                          | 6.87                          | 0.58                           | 0.55 | 0.00 | 0.00 | 25.97 | 0.19              | 100.30 | 8.088   | 0.088            | 0.001            | 3.04                                 | 0.03                   | 99.96  |
| EDS    | M6-4-new                               | 9        | 2.65                   | 63.56                          | 6.68                          | 0.72                           | 0.59 | 0.00 | 0.00 | 26.06 | 0.22              | 100.48 | 8.063   | 0.063            | 0.006            | 2.18                                 | 0.23                   | 100.24 |
| EDS    | M6-4-new                               | 10       | 2.50                   | 63.81                          | 6.66                          | 0.66                           | 0.64 | 0.03 | 0.00 | 25.99 | 0.20              | 100.49 | 8.061   | 0.061            | 0.003            | 2.13                                 | 0.13                   | 100.25 |
| EDS    | M6-4-new                               | 11       | 2.35                   | 63.63                          | 6.56                          | 0.53                           | 0.75 | 0.03 | 0.00 | 25.87 | 0.15              | 99.87  | 8.059   | 0.059            | 0.003            | 2.02                                 | 0.10                   | 99.65  |
| EDS    | M6-4-new                               | 12       | 1.97                   | 63.88                          | 6.55                          | 0.49                           | 0.76 | 0.01 |      | 25.93 | 0.18              | 99.77  | 8.042   | 0.042            | 0.009            | 1.46                                 | 0.35                   | 99.61  |
| WDS    | M6-4-new                               | 12       | 2.10                   | 63.97                          | 6.67                          | 0.40                           | 0.88 | 0.01 | 0.00 | 26.13 | 0.16              | 100.32 | 8.042   | 0.042            | 0.012            | 1.47                                 | 0.47                   | 100.16 |
| WDS    | M6-4-new                               | 10,11    | 2.31                   | 63.60                          | 6.60                          | 0.40                           | 0.71 | 0.03 | 0.00 | 26.19 | 0.15              | 99.99  | 8.048   | 0.048            | 0.012            | 1.67                                 | 0.45                   | 99.81  |
| WDS    | M6-4-new                               | 8,9      | 2.73                   | 63.20                          | 6.94                          | 0.47                           | 0.61 | 0.00 | 0.00 | 26.24 | 0.19              | 100.39 | 8.060   | 0.060            | 0.011            | 2.08                                 | 0.42                   | 100.16 |
| WDS    | M6-4-new                               | 7        | 3.07                   | 63.02                          | 6.84                          | 0.51                           | 0.53 | 0.00 | 0.02 | 26.24 | 0.11              | 100.34 | 8.079   | 0.079            | 0.000            | 2.76                                 | 0.01                   | 100.03 |
| WDS    | M6-4-new                               | 6        | 3.57                   | 62.19                          | 7.21                          | 0.61                           | 0.53 | 0.00 | 0.00 | 26.33 | 0.15              | 100.59 | 8.088   | 0.088            | 0.005            | 3.05                                 | 0.18                   | 100.25 |
| WDS    | M6-4-new                               | 5        | 3.43                   | 62.13                          | 7.43                          | 0.57                           | 0.48 | 0.04 | 0.00 | 26.18 | 0.18              | 100.44 | 8.085   | 0.085            | 0.004            | 2.94                                 | 0.16                   | 100.11 |
| WDS    | M6-4-new                               | 4        | 2.69                   | 62.24                          | 7.97                          | 0.57                           | 0.48 | 0.00 | 0.00 | 26.51 | 0.08              | 100.54 | 8.069   | 0.069            | 0.001            | 2.39                                 | 0.04                   | 100.27 |
| WDS    | M6-4-new                               | 3        | 2.82                   | 62.03                          | 8.11                          | 0.57                           | 0.45 | 0.00 | 0.00 | 26.47 | 0.09              | 100.54 | 8.073   | 0.073            | 0.000            | 2.53                                 | 0.01                   | 100.26 |
| WDS    | M6-4-new                               | new      | 3.28                   | 61.74                          | 7.82                          | 0.62                           | 0.49 | 0.00 | 0.00 | 26.18 | 0.14              | 100.27 | 8.085   | 0.085            | 0.000            | 2.96                                 | 0.00                   | 99.94  |
| WDS    | M6-4-new                               | new      | 4.08                   | 61.38                          | 7.64                          | 0.66                           | 0.56 | 0.00 | 0.00 | 26.10 | 0.18              | 100.60 | 8.104   | 0.104            | 0.001            | 3.63                                 | 0.05                   | 100.19 |
| WDS    | M6-4-new                               | new      | 4.51                   | 60.72                          | 7.43                          | 0.78                           | 0.65 | 0.03 | 0.03 | 25.96 | 0.15              | 100.26 | 8.117   | 0.117            | 0.000            | 4.05                                 | 0.01                   | 99.81  |
| WDS    | M6-4-new                               | new      | 4.71                   | 60.64                          | 7.45                          | 0.68                           | 0.69 | 0.03 | 0.02 | 25.98 | 0.14              | 100.34 | 8.122   | 0.122            | 0.000            | 4.23                                 | 0.01                   | 99.87  |
| WDS    | M6-4-new                               | new      | 3.86                   | 61.96                          | 7.53                          | 0.63                           | 0.52 | 0.03 | 0.00 | 26.17 | 0.18              | 100.89 | 8.099   | 0.099            | 0.001            | 3.44                                 | 0.04                   | 100.51 |
| WDS    | M6-4-new                               | new      | 3.59                   | 62.46                          | 7.16                          | 0.61                           | 0.63 | 0.00 | 0.00 | 26.10 | 0.27              | 100.82 | 8.080   | 0.080            | 0.012            | 2.81                                 | 0.47                   | 100.50 |
| WDS    | M6-4-new                               | new      | 3.04                   | 61.53                          | 7.66                          | 0.61                           | 0.50 | 0.00 | 0.01 | 26.49 | 0.14              | 99.97  | 8.065   | 0.065            | 0.014            | 2.26                                 | 0.53                   | 99.72  |
| WDS    | M6-4-new                               | new      | 3.30                   | 62.61                          | 7.04                          | 0.67                           | 0.56 | 0.00 | 0.00 | 26.38 | 0.15              | 100.71 | 8.080   | 0.080            | 0.006            | 2.77                                 | 0.22                   | 100.40 |
| WDS    | M6-4-new                               | new      | 3.38                   | 62.13                          | 7.45                          | 0.65                           | 0.47 | 0.00 | 0.01 | 26.38 | 0.16              | 100.64 | 8.082   | 0.082            | 0.006            | 2.85                                 | 0.22                   | 100.32 |
| WDS    | M6-4-new                               | new      | 3.54                   | 62.54                          | 7.12                          | 0.58                           | 0.55 | 0.00 | 0.00 | 26.02 | 0.19              | 100.55 | 8.091   | 0.091            | 0.000            | 3.18                                 | 0.01                   | 100.19 |
| WDS    | M6-4-new                               | new      | 3.20                   | 62.55                          | 6.92                          | 0.54                           | 0.64 | 0.03 | 0.00 | 26.01 | 0.17              | 100.06 | 8.078   | 0.078            | 0.005            | 2.70                                 | 0.20                   | 99.75  |
| WDS    | M6-4-new                               | new      | 2.31                   | 63.60                          | 6.80                          | 0.47                           | 0.81 | 0.00 | 0.01 | 26.16 | 0.07              | 100.22 | 8.059   | 0.059            | 0.001            | 2.04                                 | 0.04                   | 100.00 |
|        | Ellinaite-1                            | n=38     | 3.19                   | 62.50                          | 7.17                          | 0.62                           | 0.56 | 0.01 | 0.00 | 26.13 | 0.17              | 100.35 | 8.079   | 0.079            | 0.004            | 2.75                                 | 0.14                   | 100.04 |
|        |                                        | sd       | 0.61                   | 0.82                           | 0.44                          | 0.10                           | 0.12 | 0.01 | 0.01 | 0.17  | 0.05              |        |         |                  |                  | 0.71                                 | 0.19                   |        |
|        |                                        | min      | 1.97                   | 60.64                          | 6.55                          | 0.40                           | 0.37 | 0.00 | 0.00 | 25.87 | 0.07              |        |         |                  |                  | 1.47                                 | 0.00                   |        |
|        |                                        | max      | 4.71                   | 63.97                          | 8.11                          | 0.89                           | 0.88 | 0.04 | 0.03 | 26.51 | 0.31              |        |         |                  |                  | 4.23                                 | 0.53                   |        |

SiO<sub>2</sub>, NiO and SrO are below detection limits (<0.005 wt.%). Formula based on 3 cations and 4 oxygens. Ti<sub>2</sub>O<sub>3</sub> and TiO<sub>2</sub> are calculated by charge balance.

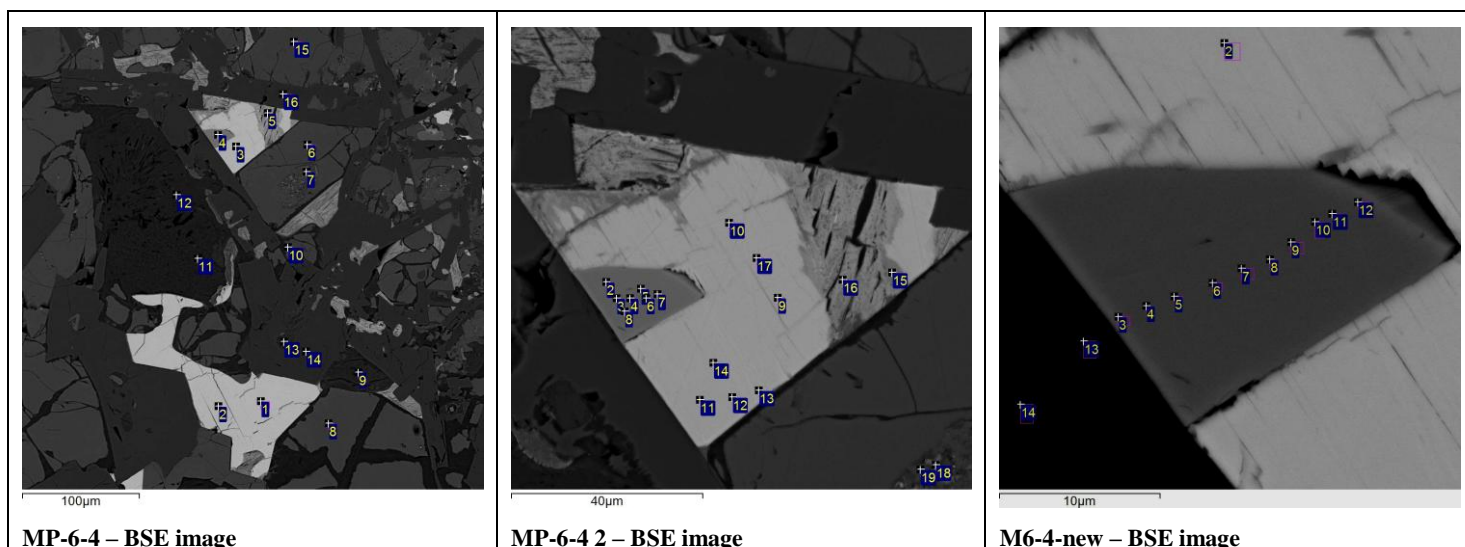

**Table S4.** Variations of chemical composition (in wt.%) for the ellinaite-2 grain from rankinite-gehlenite paralava (sample MP-2013-6), Hatrurim Basin.

| Method      | Picture                                | EDS spot    | TiO <sub>2</sub> total | Cr <sub>2</sub> O <sub>3</sub> | V <sub>2</sub> O <sub>3</sub> | Al <sub>2</sub> O <sub>3</sub> | FeO  | MnO  | MgO  | CaO   | Na <sub>2</sub> O | Sum    | Sum oxy | Ti <sup>3+</sup> | Ti <sup>4+</sup> | Ti <sub>2</sub> O <sub>3</sub> calc. | TiO <sub>2</sub> calc. | Sum    |
|-------------|----------------------------------------|-------------|------------------------|--------------------------------|-------------------------------|--------------------------------|------|------|------|-------|-------------------|--------|---------|------------------|------------------|--------------------------------------|------------------------|--------|
|             | ideal CaCr <sub>2</sub> O <sub>4</sub> |             |                        | 73.05                          |                               |                                |      |      |      | 26.95 |                   | 100.00 | 8.000   |                  |                  |                                      |                        | 100.00 |
| EDS         | MP-13-6-4 2                            | 6           | 1.17                   | 68.07                          | 4.37                          | 0.32                           | 0.85 | 0.00 | 0.50 | 25.08 | 0.22              | 100.58 | 8.028   | 0.028            | 0.002            | 0.97                                 | 0.09                   | 100.47 |
| EDS         | MP-13-6-4 2                            | 17          | 0.97                   | 67.40                          | 4.87                          | 0.32                           | 0.32 | 0.09 | 0.00 | 26.23 | 0.16              | 100.36 | 8.023   | 0.023            | 0.002            | 0.82                                 | 0.06                   | 100.27 |
| EDS         | MP-13-6-4 2                            | 18          | 1.20                   | 67.77                          | 4.49                          | 0.36                           | 0.85 | 0.00 | 0.28 | 25.30 | 0.21              | 100.46 | 8.031   | 0.031            | 0.000            | 1.08                                 | 0.00                   | 100.34 |
| EDS         | MP-13-6-4 2                            | 19          | 1.27                   | 67.96                          | 4.46                          | 0.30                           | 0.82 | 0.00 | 0.32 | 25.16 | 0.25              | 100.54 | 8.032   | 0.032            | 0.001            | 1.12                                 | 0.02                   | 100.41 |
| EDS         | MP-13-6-4 2                            | 20          | 1.20                   | 68.02                          | 4.40                          | 0.40                           | 0.45 | 0.00 | 0.41 | 25.50 | 0.22              | 100.60 | 8.030   | 0.030            | 0.001            | 1.05                                 | 0.03                   | 100.48 |
| EDS         | MP-13-6-4 2                            | 21          | 1.03                   | 67.60                          | 4.33                          | 0.47                           | 0.30 | 0.00 | 0.00 | 26.09 | 0.19              | 100.01 | 8.027   | 0.027            | 0.000            | 0.93                                 | 0.00                   | 99.91  |
| EDS         | MP-13-6-4 2                            | 23          | 0.92                   | 67.38                          | 4.94                          | 0.26                           | 0.39 | 0.00 | 0.00 | 26.17 | 0.21              | 100.27 | 8.018   | 0.018            | 0.006            | 0.61                                 | 0.24                   | 100.20 |
| EDS         | MP-13-6-4 2                            | 24          | 1.28                   | 67.98                          | 4.40                          | 0.38                           | 0.70 | 0.00 | 0.38 | 25.31 | 0.25              | 100.68 | 8.030   | 0.030            | 0.003            | 1.04                                 | 0.12                   | 100.56 |
| EDS         | MP-13-6-4 2                            | 25          | 0.93                   | 66.43                          | 5.49                          | 0.26                           | 0.66 | 0.00 | 0.20 | 26.01 | 0.16              | 100.14 | 8.012   | 0.012            | 0.012            | 0.42                                 | 0.47                   | 100.09 |
| EDS         | MP-13-6-4 2                            | 26          | 1.33                   | 67.79                          | 4.19                          | 0.38                           | 0.56 | 0.05 | 0.23 | 25.60 | 0.23              | 100.36 | 8.030   | 0.030            | 0.004            | 1.04                                 | 0.17                   | 100.24 |
| Ellinaite-2 |                                        | <i>n=10</i> | 1.13                   | 67.64                          | 4.59                          | 0.35                           | 0.59 | 0.01 | 0.23 | 25.65 | 0.21              | 100.40 | 8.026   | 0.026            | 0.003            | 0.91                                 | 0.12                   | 100.30 |
|             |                                        | <i>sd</i>   | 0.15                   | 0.49                           | 0.39                          | 0.07                           | 0.22 | 0.03 | 0.18 | 0.44  | 0.03              |        |         |                  |                  | 0.23                                 | 0.14                   |        |
|             |                                        | <i>min</i>  | 0.92                   | 66.43                          | 4.19                          | 0.26                           | 0.30 | 0.00 | 0.00 | 25.08 | 0.00              |        |         |                  |                  | 0.42                                 | 0.00                   |        |
|             |                                        | <i>max</i>  | 1.33                   | 68.07                          | 5.49                          | 0.47                           | 0.85 | 0.09 | 0.50 | 26.23 | 0.25              |        |         |                  |                  | 1.12                                 | 0.47                   |        |

SiO<sub>2</sub>, NiO and SrO are below detection limits (<0.005 wt.%). Formula based on 3 cations and 4 oxygens. Ti<sub>2</sub>O<sub>3</sub> and TiO<sub>2</sub> are calculated by charge balance.

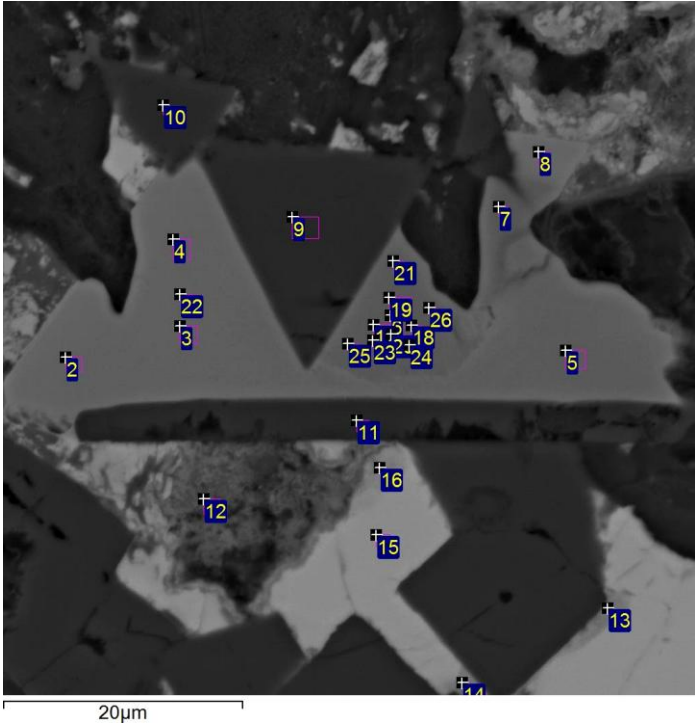

MP-13-6-4 2 – BSE image
